# Supplementary material
Source: Research Square preprint supplement (doi:10.21203/rs.3.rs-9874513/v1)
Supplement: Supplementary file 1 [file c222c5fc22fbbafc0c5fe004.docx]

**ionScell enables microscopy-independent single-cell spectral extraction from MALDI mass spectrometry imaging**

Yanis Zirem1†, Laurine Lagache1†, Léa Ledoux1†, Julie Defrance1†, Isabelle Fournier1,2*, Michel Salzet1,2*

1 *Univ. Lille, Inserm, CHU Lille, U1192 – Proteomics Inflammatory Response Mass Spectrometry – PRISM, F-59000 Lille, France*

2 *Institut Universitaire de France, 75000 Paris, France*

*†Equal contribution *Co-corresponding authors*

Correspondence: michel.salzet@univ-lille.fr; isabelle.fournier@univ-lille.fr


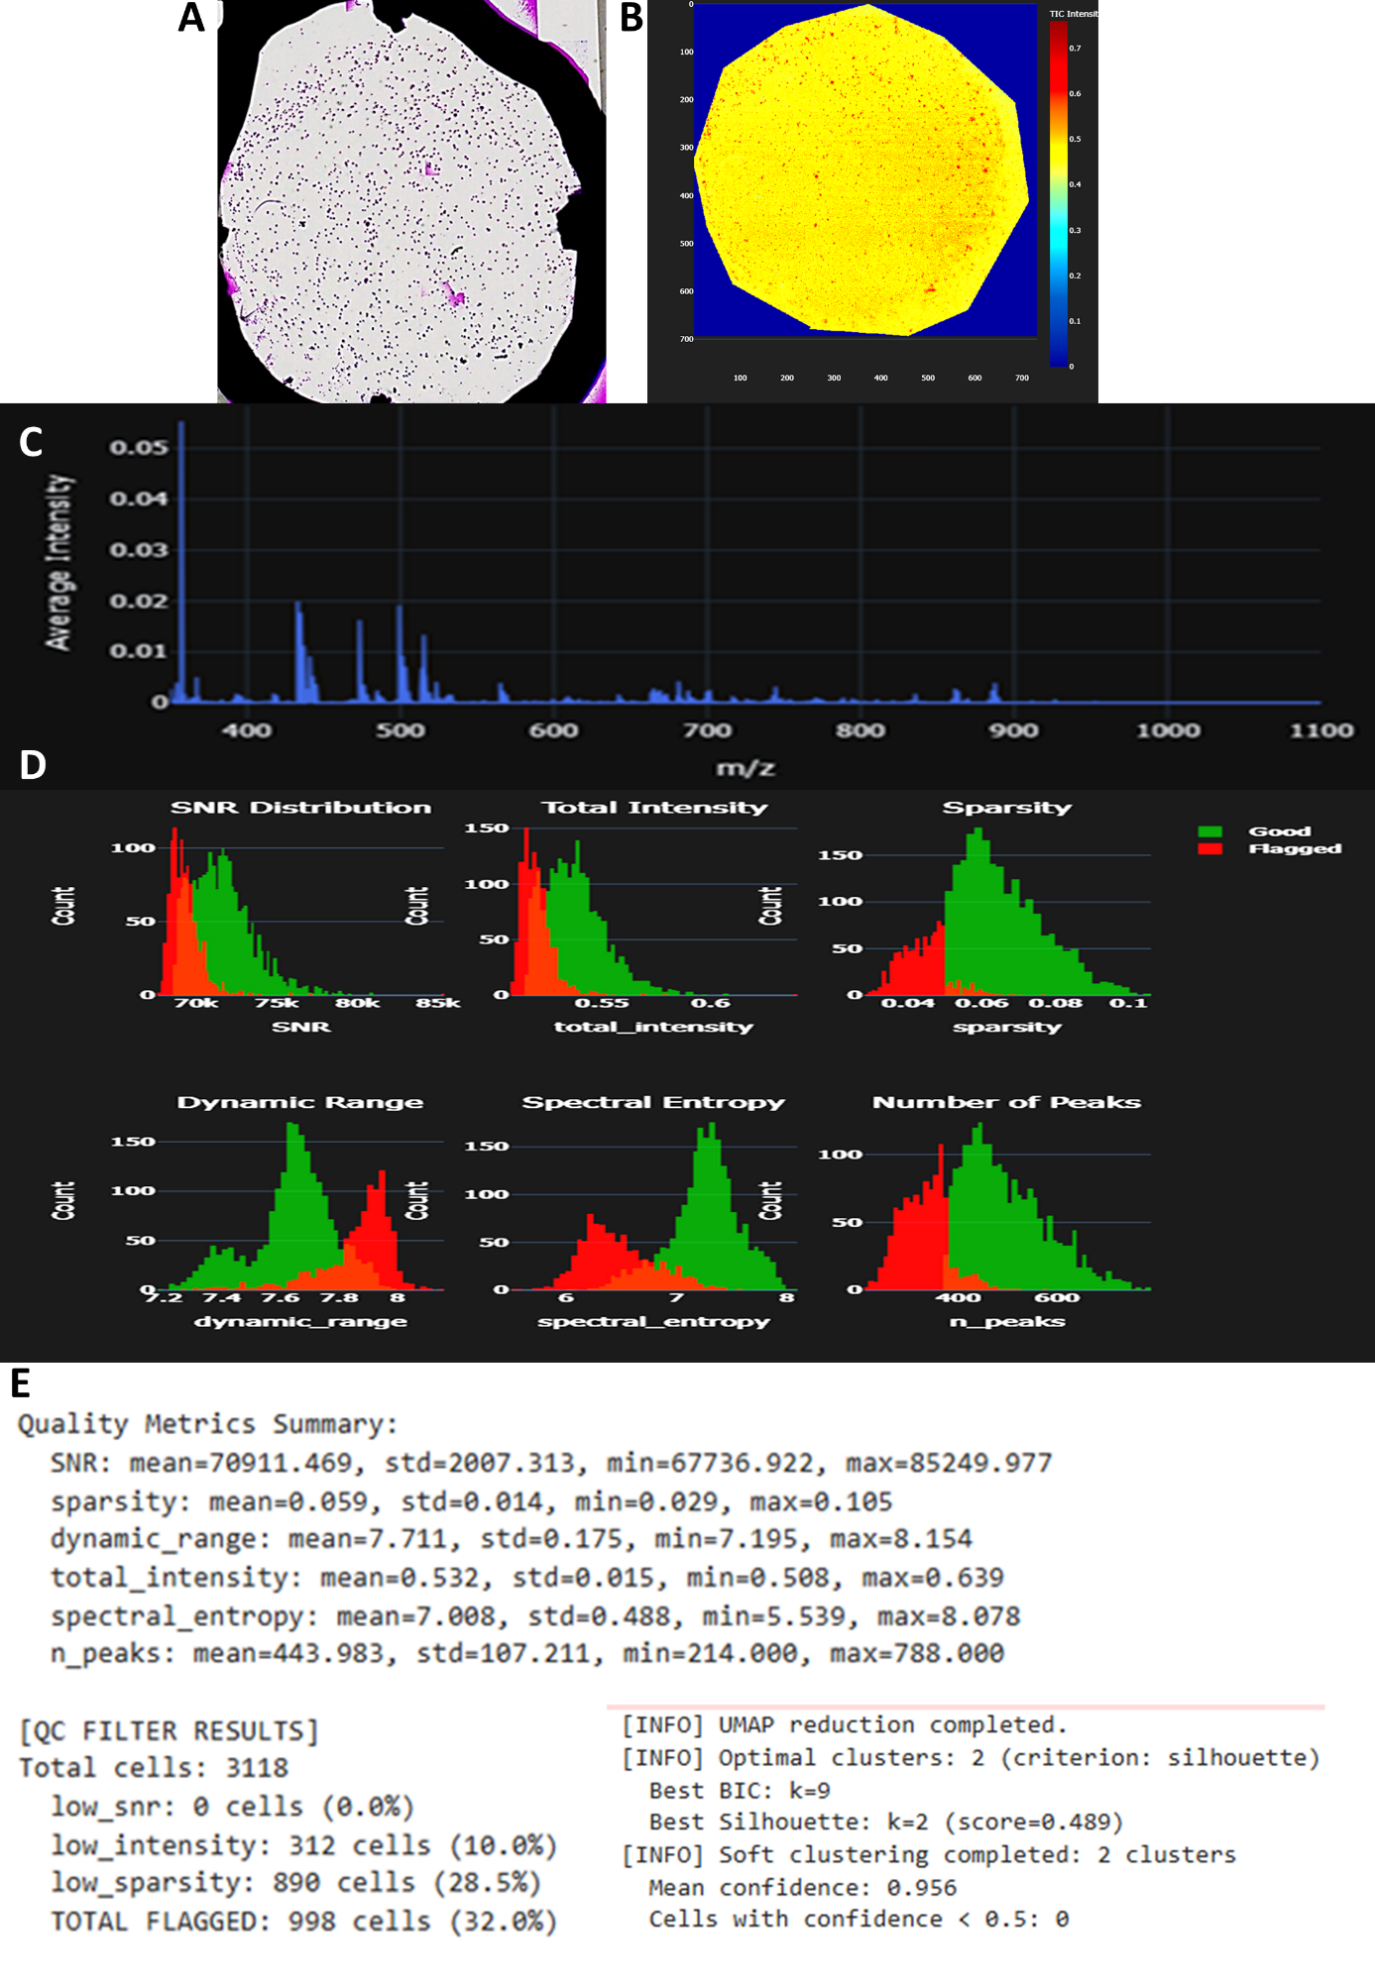


**Figure S1: Quality metrics for MCF7 negative-mode analysis.** (A) Microscopy image of the cells. (B) Corresponding TIC MALDI image. (C) Average mass spectrum. (D) Histograms of quality-control metrics. (E) Summary of quality-control results

**Table S1.** Comparison of existing approaches for single-cell spectral extraction from MALDI-MSI data.

| **Method** | **Key limitation** | **Reference** |
| --- | --- | --- |
| Manual cell selection | Low throughput; impractical for large-scale studies | Cuypers *et al.* [10] |
| ROI segmentation (SCiLS Lab, lipid panel) | Limited to homogeneous populations; no single-cell delineation | Sekera *et al*. [11] |
| Fluorescence microscopy co-registration | Additional experimental step; co-registration error propagation | Bien *et al*. [12] |
| Pre-/post-MALDI ablation mark alignment | High procedural complexity; alignment artefacts | Rappez *et al.* [13] |
| Ion-based DFS segmentation (MSI Parser) | Depends on a single ion; sensitive to ion choice | Zhang *et al.* [14] |
| PRISM-MS (Monte Carlo + GUV calibration) | Requires GUV ground truth; limited to low-mass metabolites | Cairns et al. [47] |

Table S2. Per-cell-line and per-mode cell recovery and QC statistics across all ionScell acquisitions. Retention denotes the proportion of segmented cell objects that passed the six-metric spectral QC filter and therefore represents usable single-cell spectral yield, not formal segmentation recall against an exhaustive ground-truth cell count. The lower retention for MCF-7 negative mode (68.0%) reflects this densely growing epithelial line’s higher rate of cell overlap and is discussed in the main text.

| **Cell Line** | **Condition** | **Segmented** | **Retained** | **Retention** |
| --- | --- | --- | --- | --- |
| **MCF-7** | Negative | 3118 | 2120 | 68.0% |
| Positive | 2827 | 2543 | 90% |
| **AU565** | Negative | 1394 | 1246 | 89.4% |
| Positive | 1328 | 1195 | 90.0% |
| **MDA-MB-231** | Negative | 5476 | 4928 | 90.0% |
| Positive | 4794 | 4314 | 90.0% |
| **NCH82** | Negative | 3,889 | 3509 | 90.0% |
| Positive | 3678 | 3310 | 90.0% |


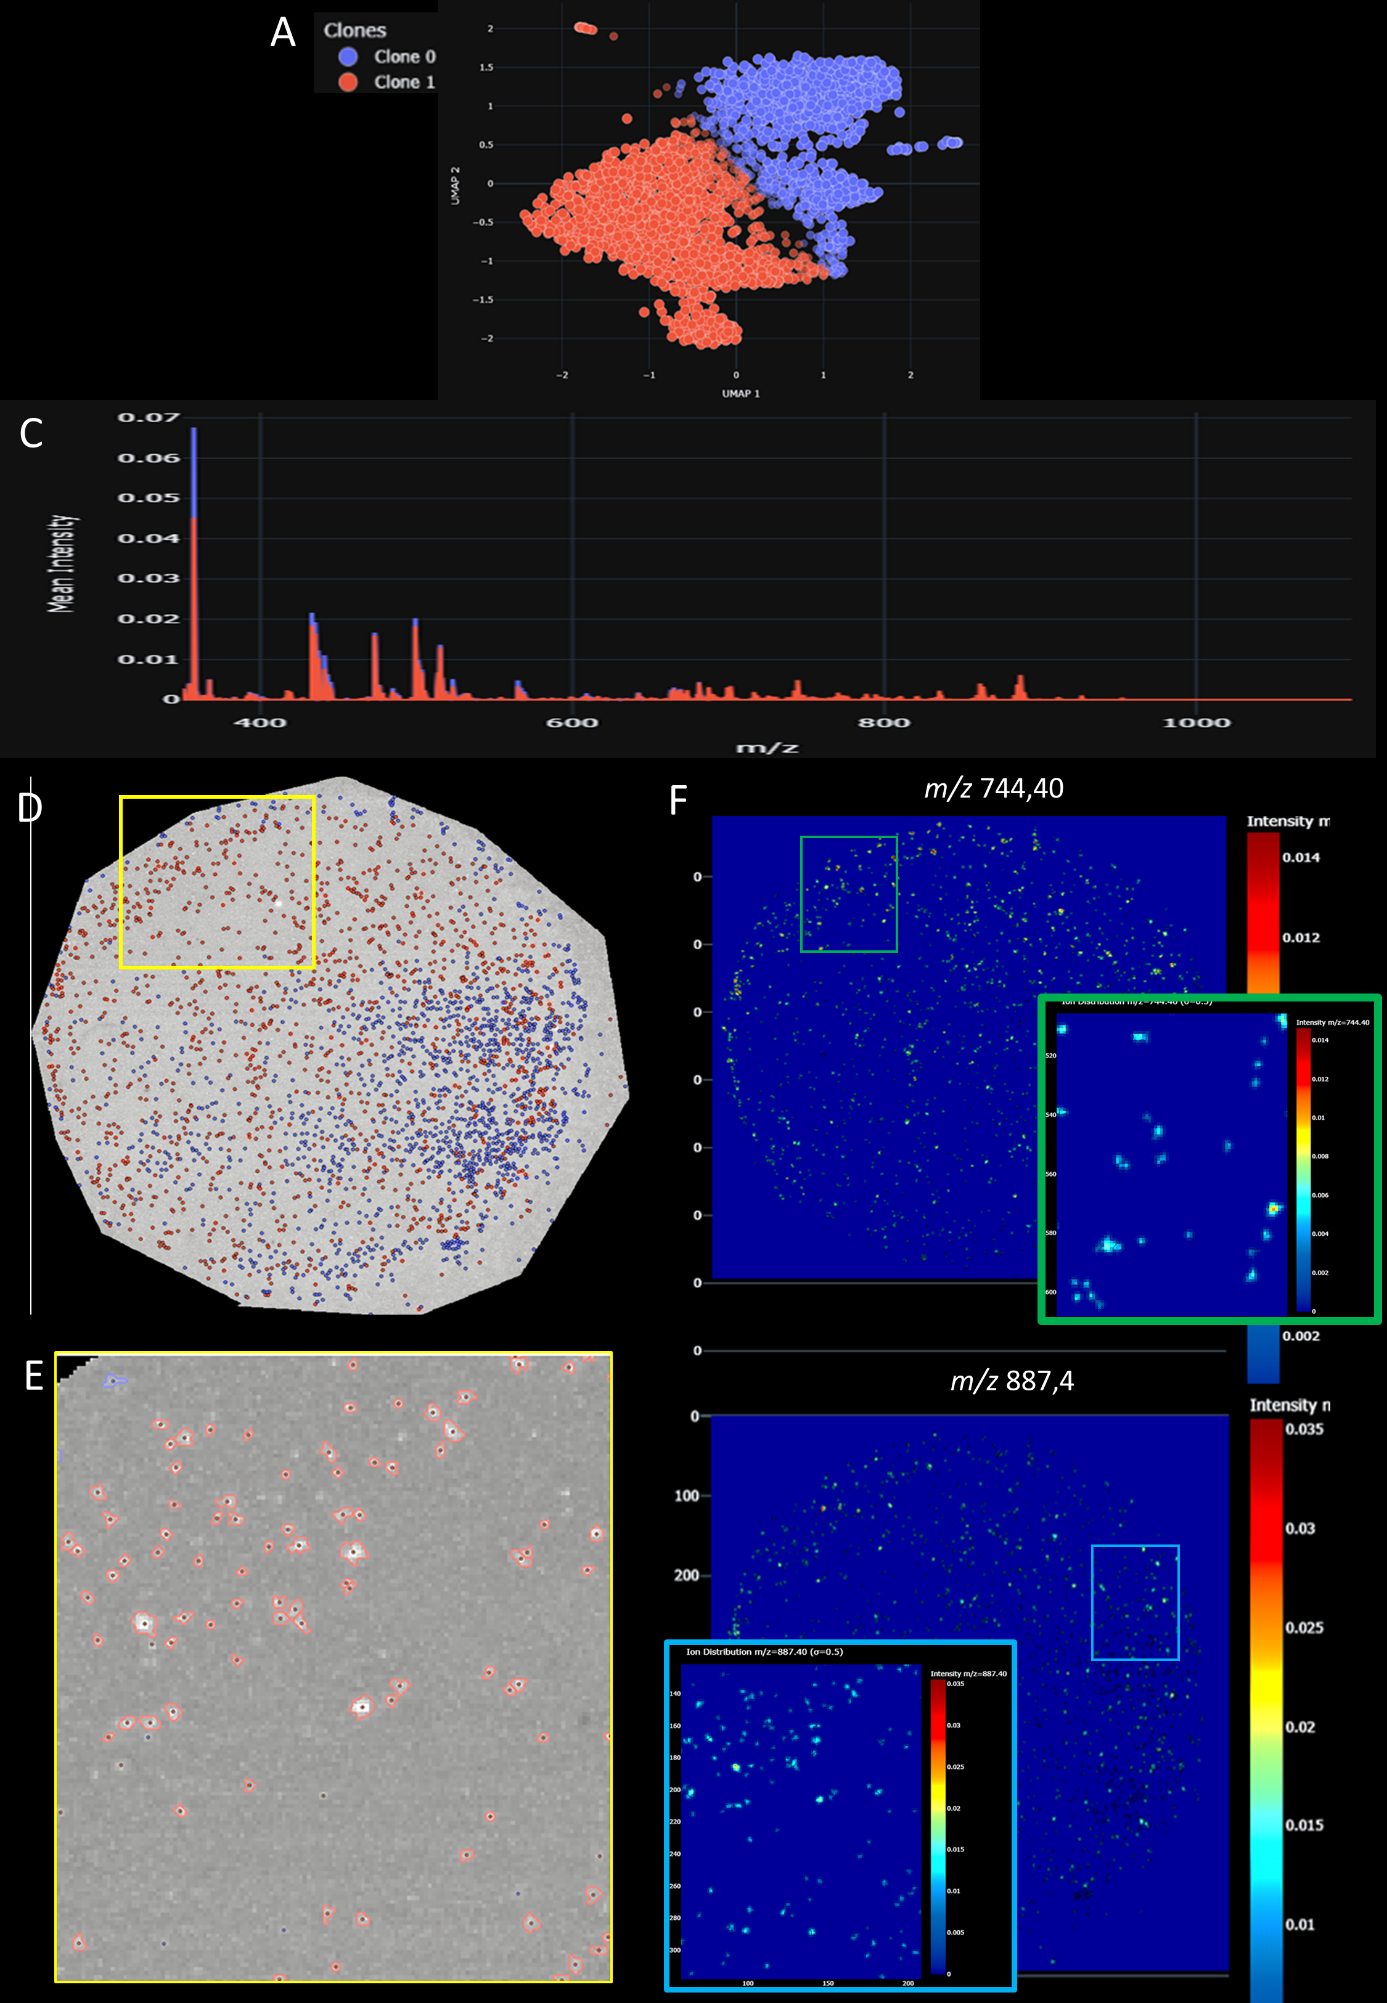


**Figure S2: Spatial and Molecular Characterization of MCF7 negative-mode and Cells molecular Subpopulations.** **(A) UMAP Visualization of Lipidomic Clusters.** Uniform Manifold Approximation and Projection (UMAP) plot showing the dimensionally reduced clustering of single-cell spectra. Cells are color-coded into two distinct molecular subpopulations (0–1), indicating metabolic heterogeneity within the MCF7 population. **(B) Spatial Back-Projection of Molecular Subpopulations.** Spatial map of the entire sample where each dot represents a single cell, color-coded by its molecular subpopulation assignment (MSp 0 and MSp 1). **(C) Representative Negative Mode Mass Spectrum.** Mean intensity spectrum highlighting prominent lipid species identified in negative ion mode. Peaks are color-coded by their contribution to the specific clusters identified in Panel B. **(D) Spatial Distribution Map of molecular Subpopulations.** A reconstructed spatial map of the entire sample where each dot represents a single cell, color-coded by its molecular cell populations. The yellow box indicates the region of interest magnified in Panel E. **(E) High-Magnification Spatial ROI.** Zoomed-in view of the area highlighted in Panel D, showing the precise spatial arrangement and segmentation masks of the different MCF7 subpopulations. **(F) Ion-Specific Intensity Maps.** Spatial distribution and abundance of specific lipid ions (m/z 744.4 and m/z 887.4). The heatmaps (pseudo-colored from blue to red) demonstrate how specific lipid metabolites are differentially expressed across the cell population, corresponding to the clusters identified in the UMAP.


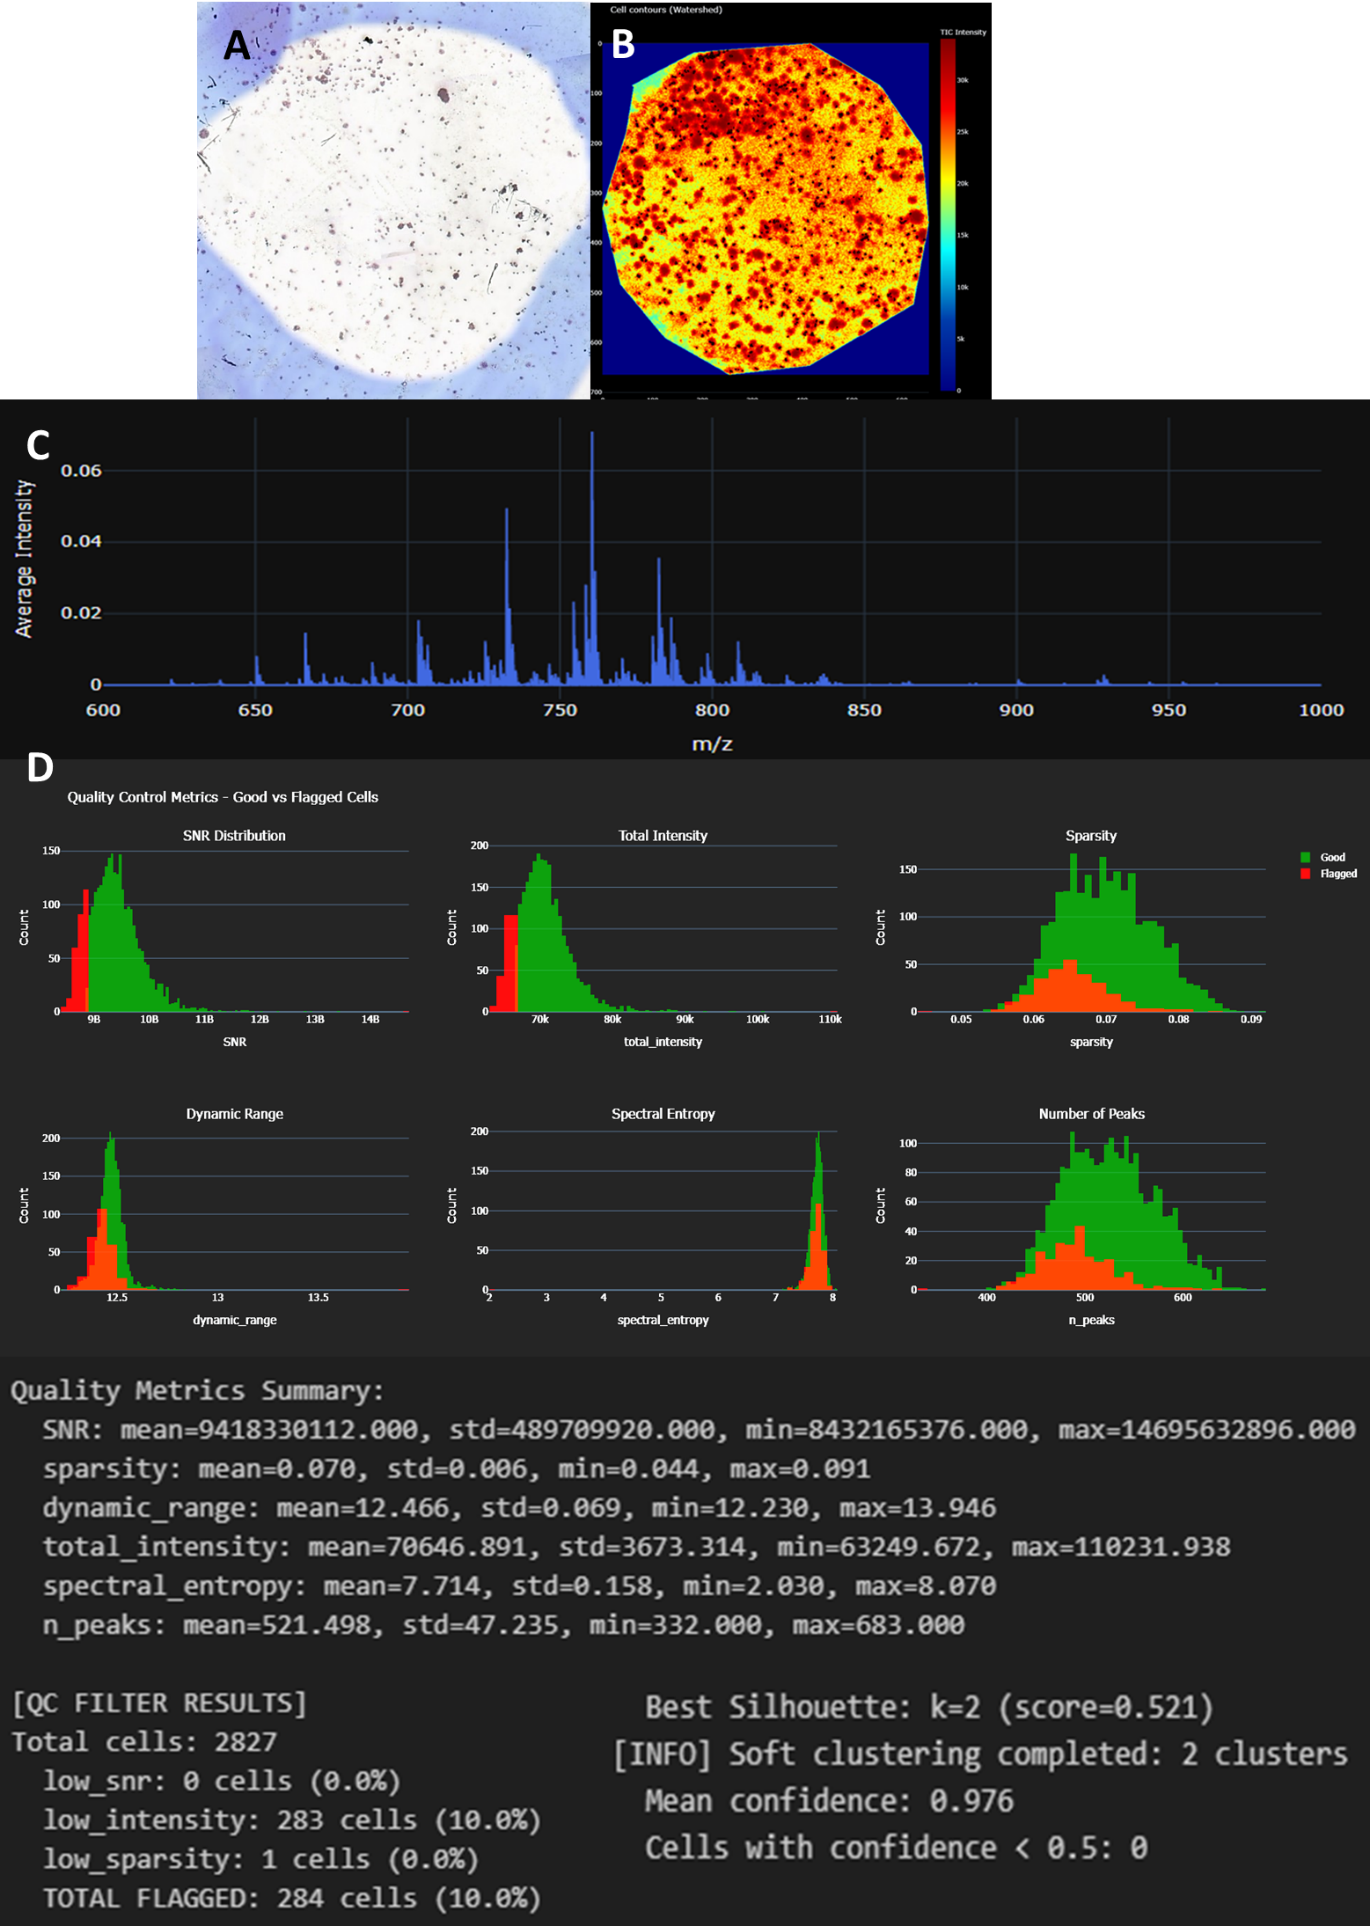


**Figure S3: Quality metrics for MCF7 positive-mode analysis.** (A) Microscopy image of the cells. (B) Corresponding TIC MALDI image. (C) Average mass spectrum zoomed mass range 600-1000 m/z. (D) Histograms of quality-control metrics. (E) Summary of quality-control results.

***
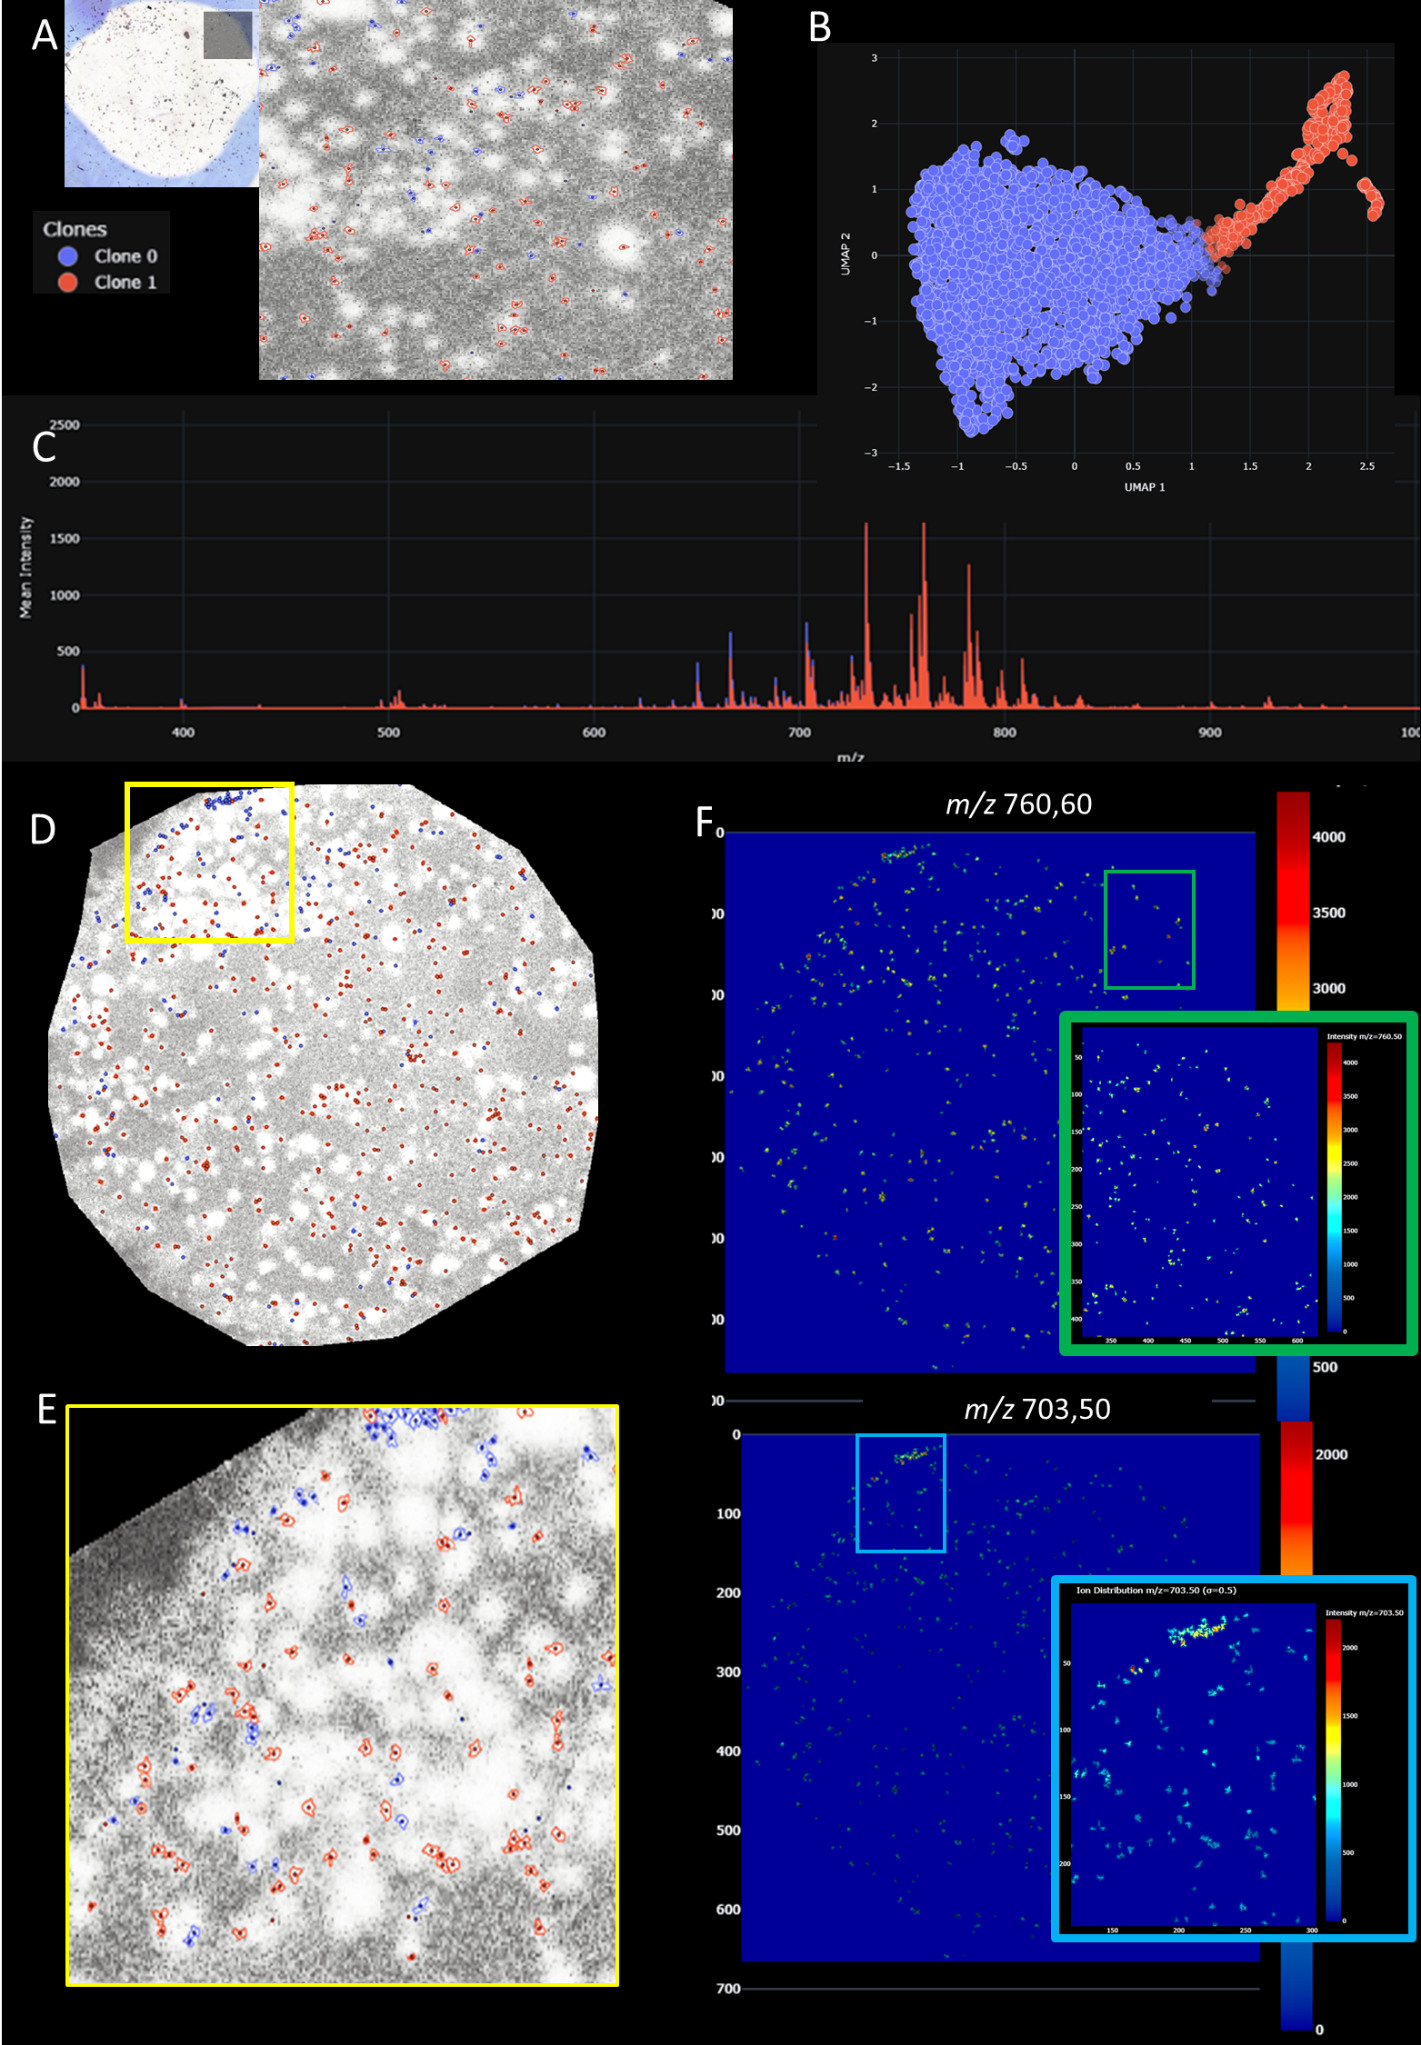
***

**Figure S4: Spatial and Molecular Characterization of MCF7 positive-mode and Cells molecular Subpopulations.** **(A) Optical Microscopy and Cell Segmentation.** High-resolution brightfield image of MCF7 cells pre-MALDI analysis. Inset shows the full sample area, while the main view displays individual cell segmentation and initial assignments based on morphological and spatial features. **(B) UMAP Visualization of Lipidomic Clusters.** Uniform Manifold Approximation and Projection (UMAP) plot showing the dimensionally reduced clustering of single-cell spectra. Cells are color-coded into two distinct molecular subpopulations (0–1), indicating metabolic heterogeneity within the MCF7 population. **(C) Representative Positive Mode Mass Spectrum.** Mean intensity spectrum highlighting prominent lipid species identified in positive ion mode. Peaks are color-coded by their contribution to the specific clusters identified in Panel B. **(D) Spatial Distribution Map** **of molecular Subpopulations.** A reconstructed spatial map of the entire sample where each dot represents a single cell, color-coded by its molecular cell populations. The yellow box indicates the region of interest magnified in Panel E. **(E) High-Magnification Spatial ROI.** Zoomed-in view of the area highlighted in Panel D, showing the precise spatial arrangement and segmentation masks of the different MCF7 subpopulations. **(F) Ion-Specific Intensity Maps.** Spatial distribution and abundance of specific lipid ions (*m/z* 760.60 and *m/z* 703.50). The heatmaps (pseudo-colored from blue to red) demonstrate how specific lipid metabolites are differentially expressed across the cell population, corresponding to the clusters identified in the UMAP.

**
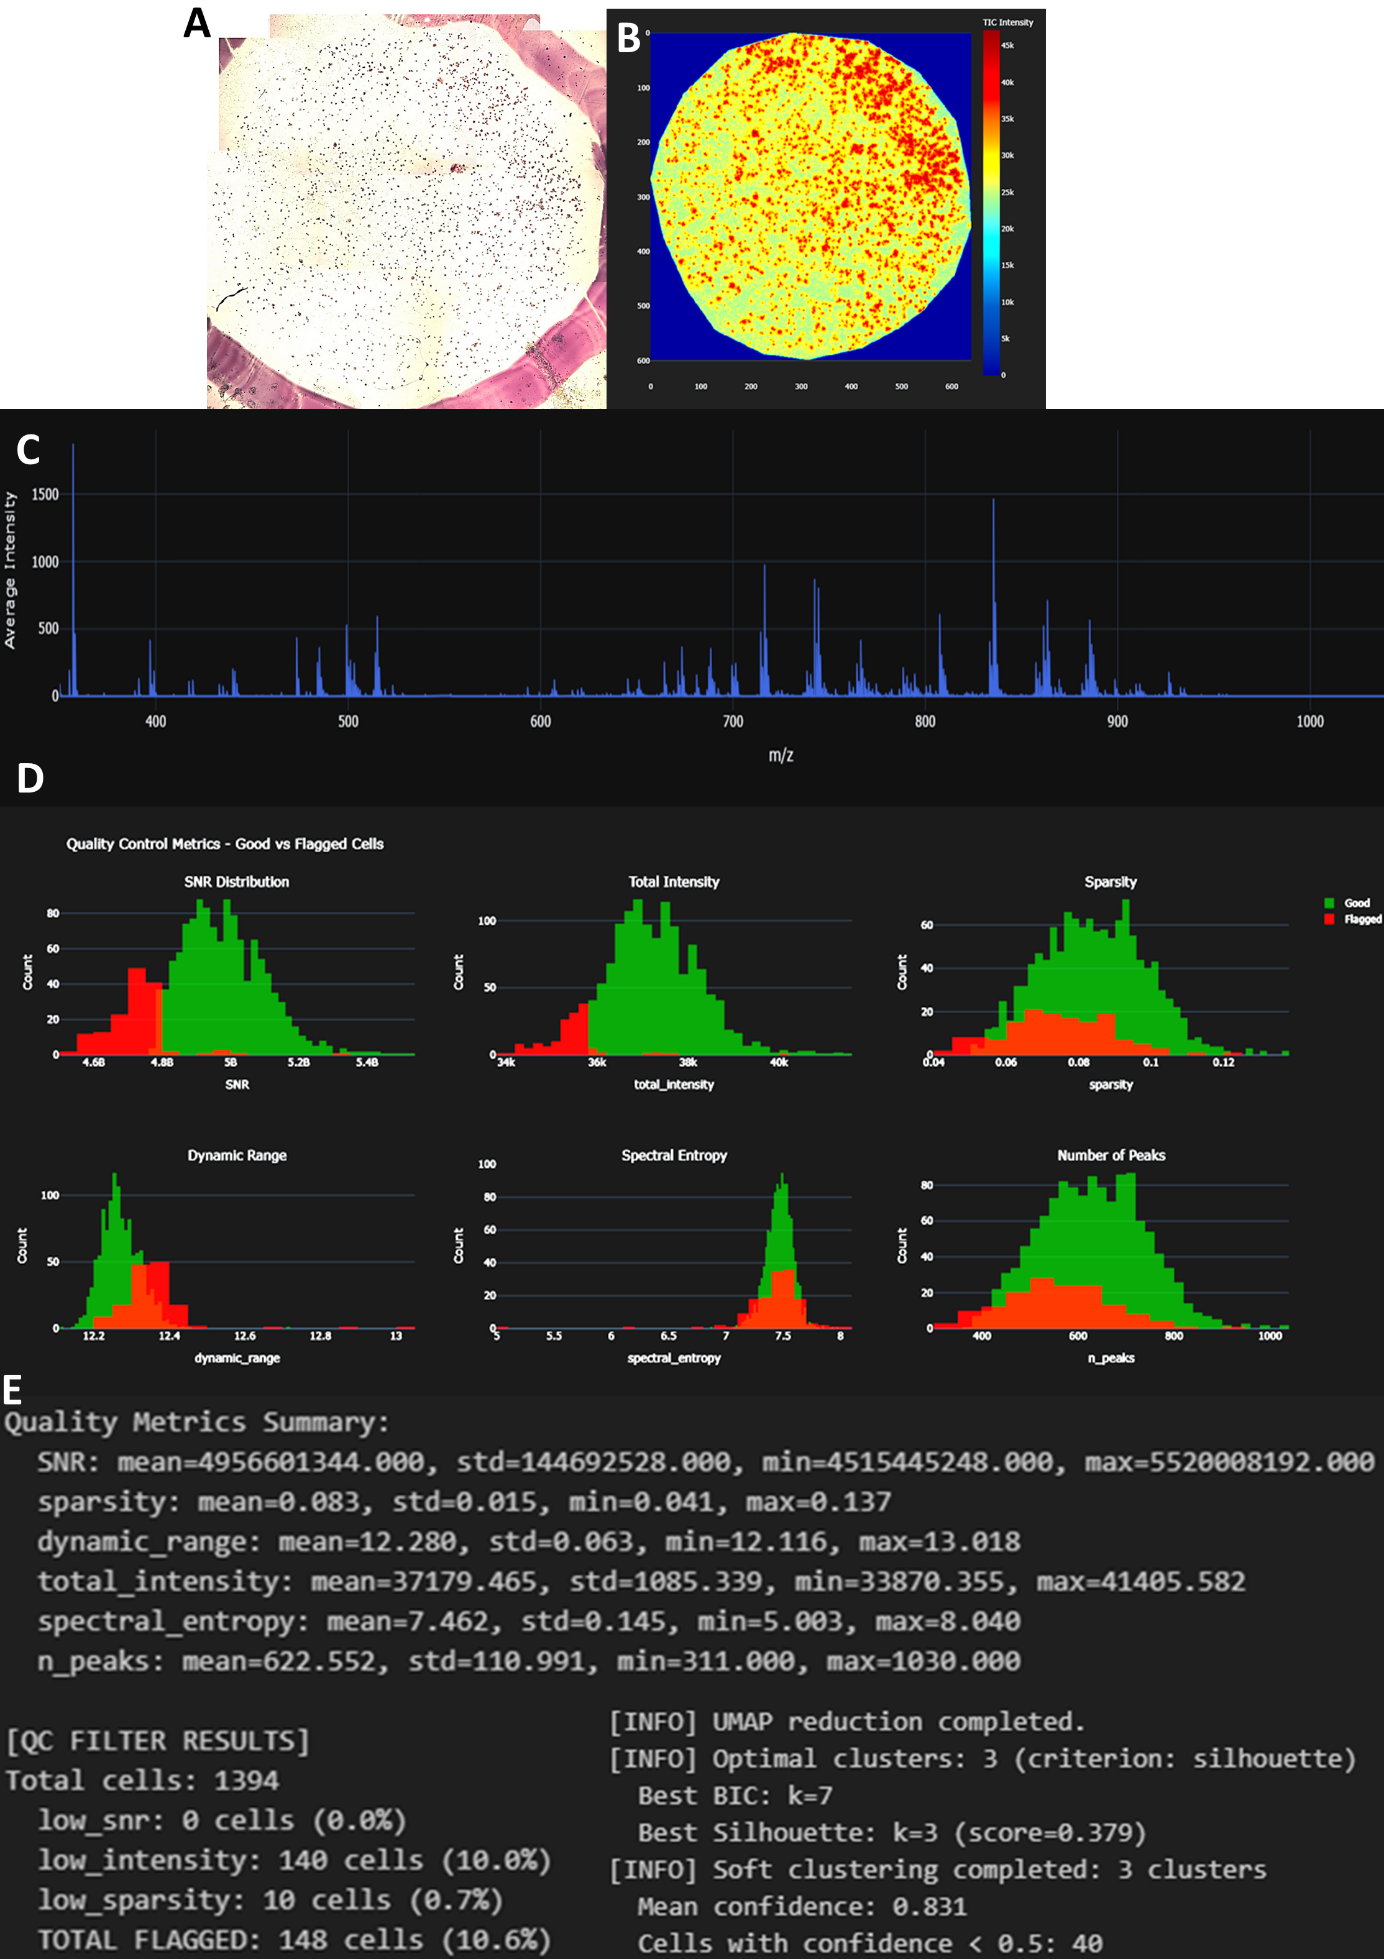
Figure S5:** **Quality metrics for AU565 negative-mode analysis.** (A) Microscopy image of the cells. (B) Corresponding TIC MALDI image. (C) Average mass spectrum. (D) Histograms of quality-control metrics. (E) Summary of quality-control results.


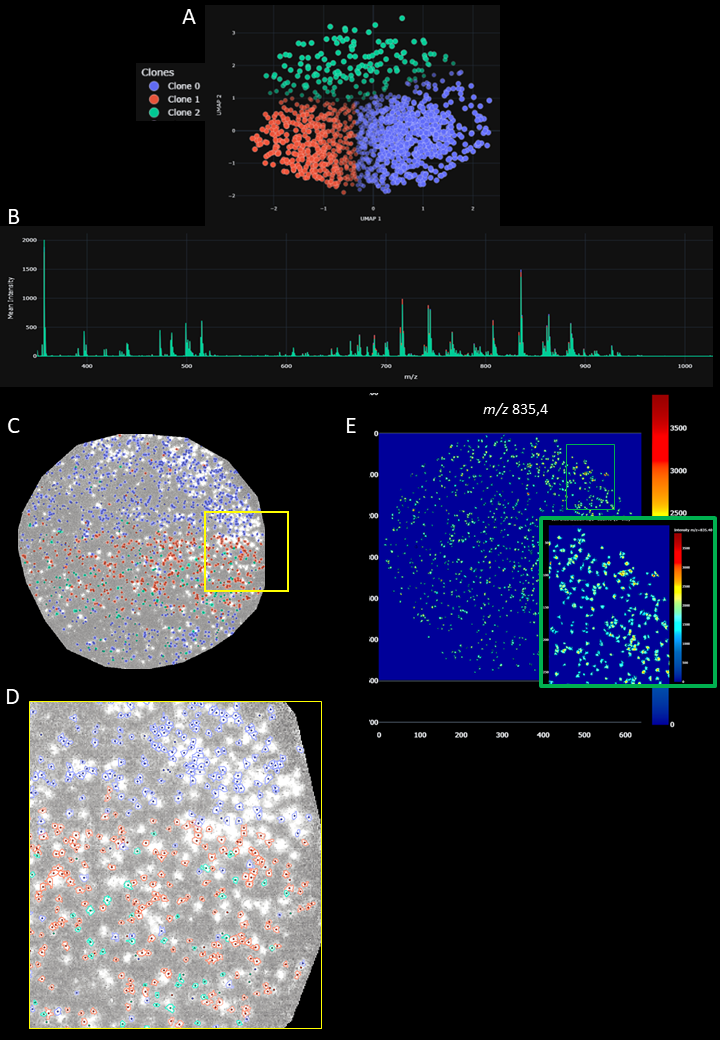


**Figure S6: Spatial and Molecular Characterization of AU565 negative-mode and Cells molecular Subpopulations.** **(A) UMAP Visualization of Lipidomic Clusters.** Uniform Manifold Approximation and Projection (UMAP) plot showing the dimensionally reduced clustering of single-cell spectra. Cells are color-coded into three distinct molecular subpopulations (0-1-2), indicating metabolic heterogeneity within the AU565 population. **(B) Representative Negative Mode Mass Spectrum.** Mean intensity spectrum highlighting prominent lipid species identified in negative ion mode. Peaks are color-coded by their contribution to the specific clusters identified in Panel B. **(C) Spatial Distribution Map of molecular Subpopulations.** A reconstructed spatial map of the entire sample where each dot represents a single cell, color-coded by its molecular cell populations. The yellow box indicates the region of interest magnified in Panel E. **(D) High-Magnification Spatial ROI.** Zoomed-in view of the area highlighted in Panel D, showing the precise spatial arrangement and segmentation masks of the different AU565 subpopulations. **(E) Ion-Specific Intensity Maps.** Spatial distribution and abundance of specific lipid ion (*m/z* 835.4). The heatmaps (pseudo-colored from blue to red) demonstrate how specific lipid metabolites are differentially expressed across the cell population, corresponding to the clusters identified in the UMAP.

*
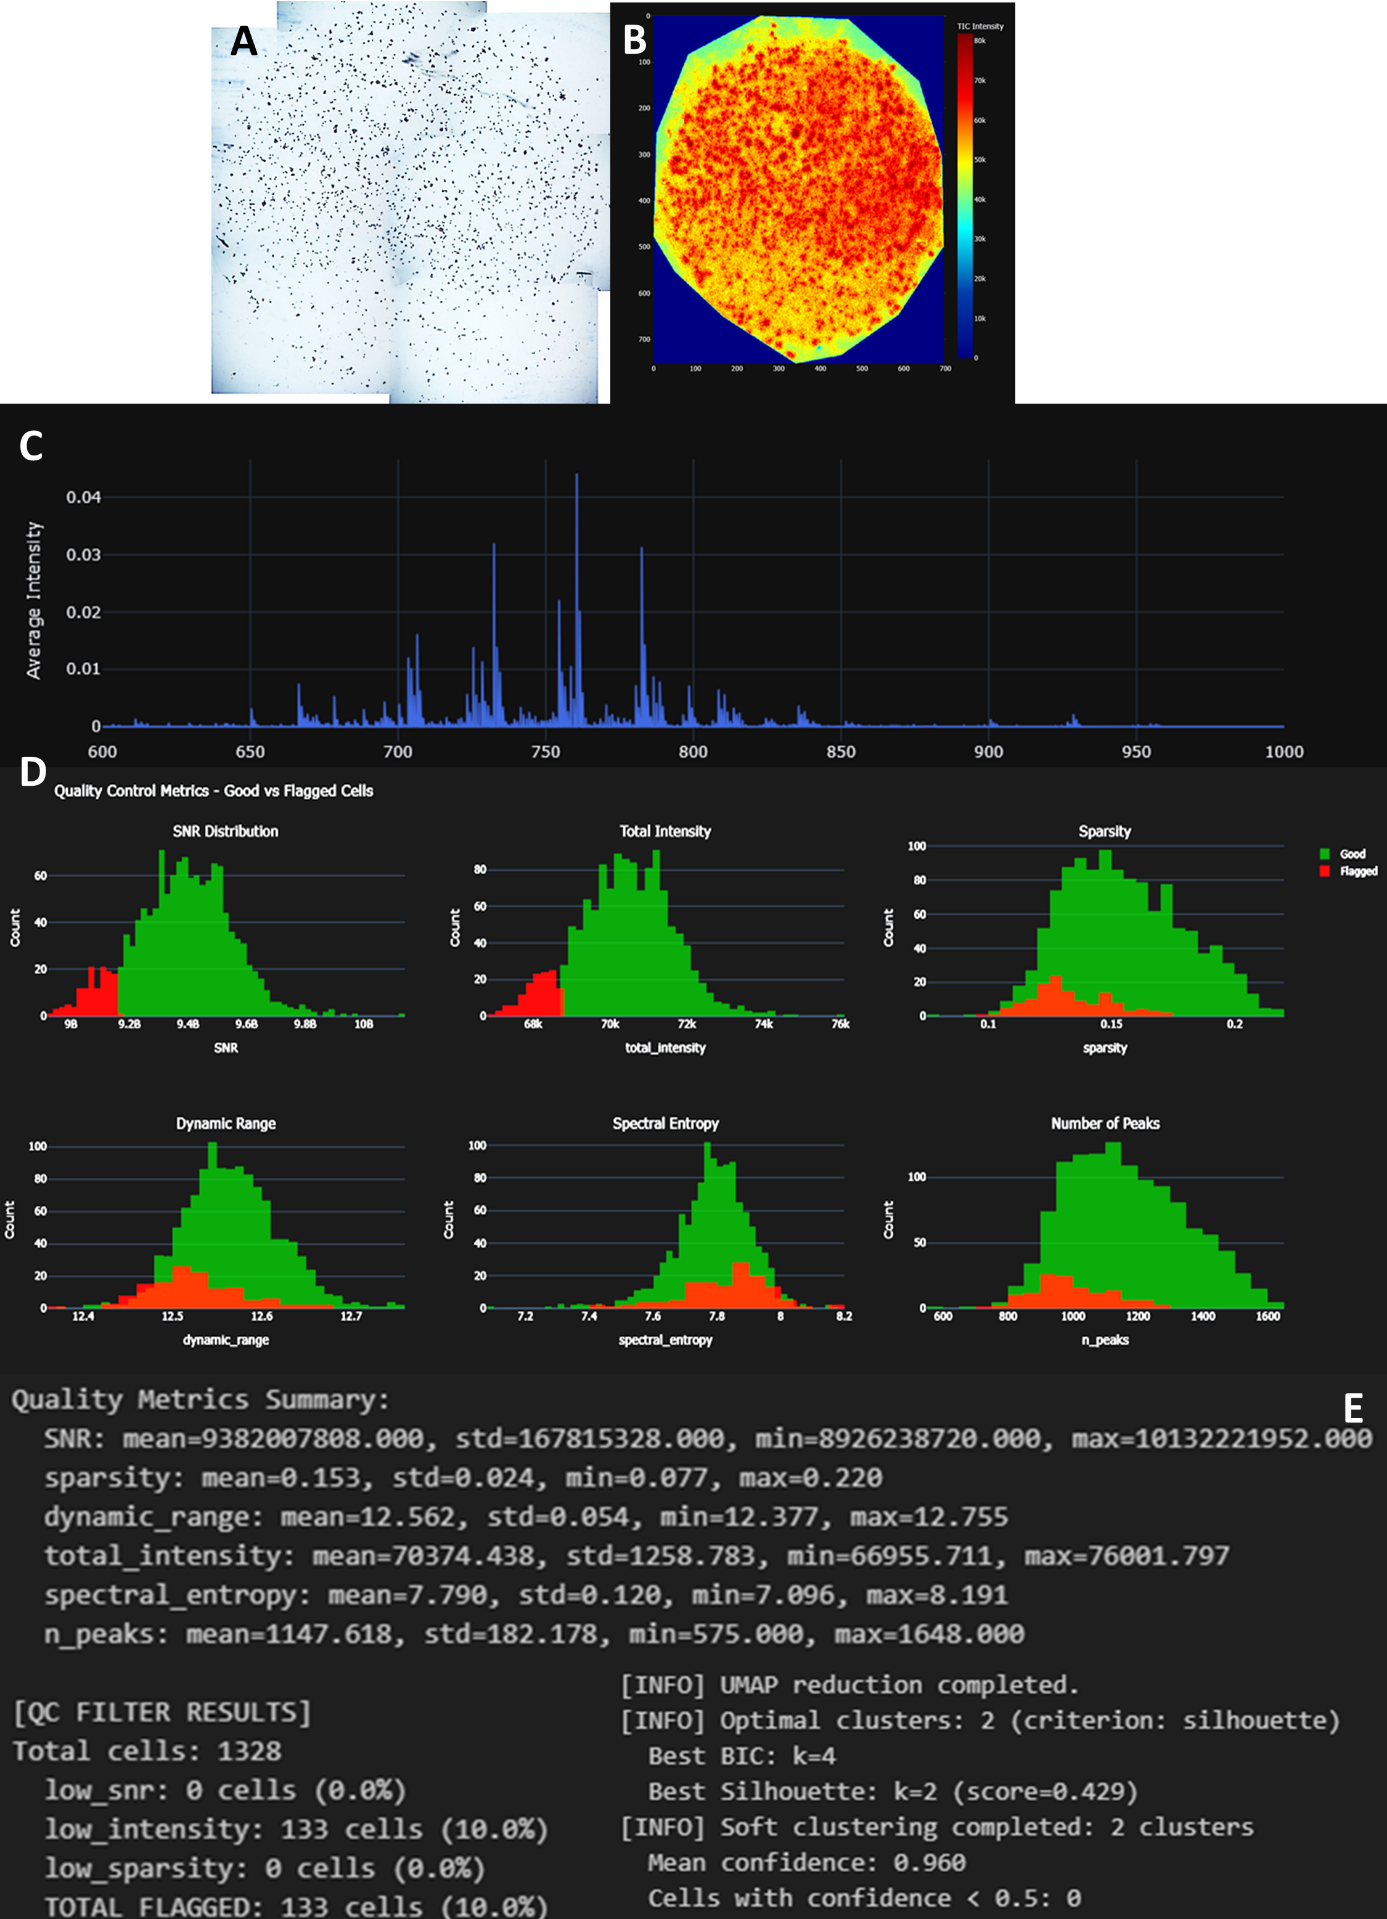
*

**Figure S7: Quality metrics for AU565 positive-mode analysis.** (A) Microscopy image of the cells. (B) Corresponding TIC MALDI image. (C) Average mass spectrum zoomed mass range 600-1000 *m/z*. (D) Histograms of quality-control metrics. (E) Summary of quality-control results.


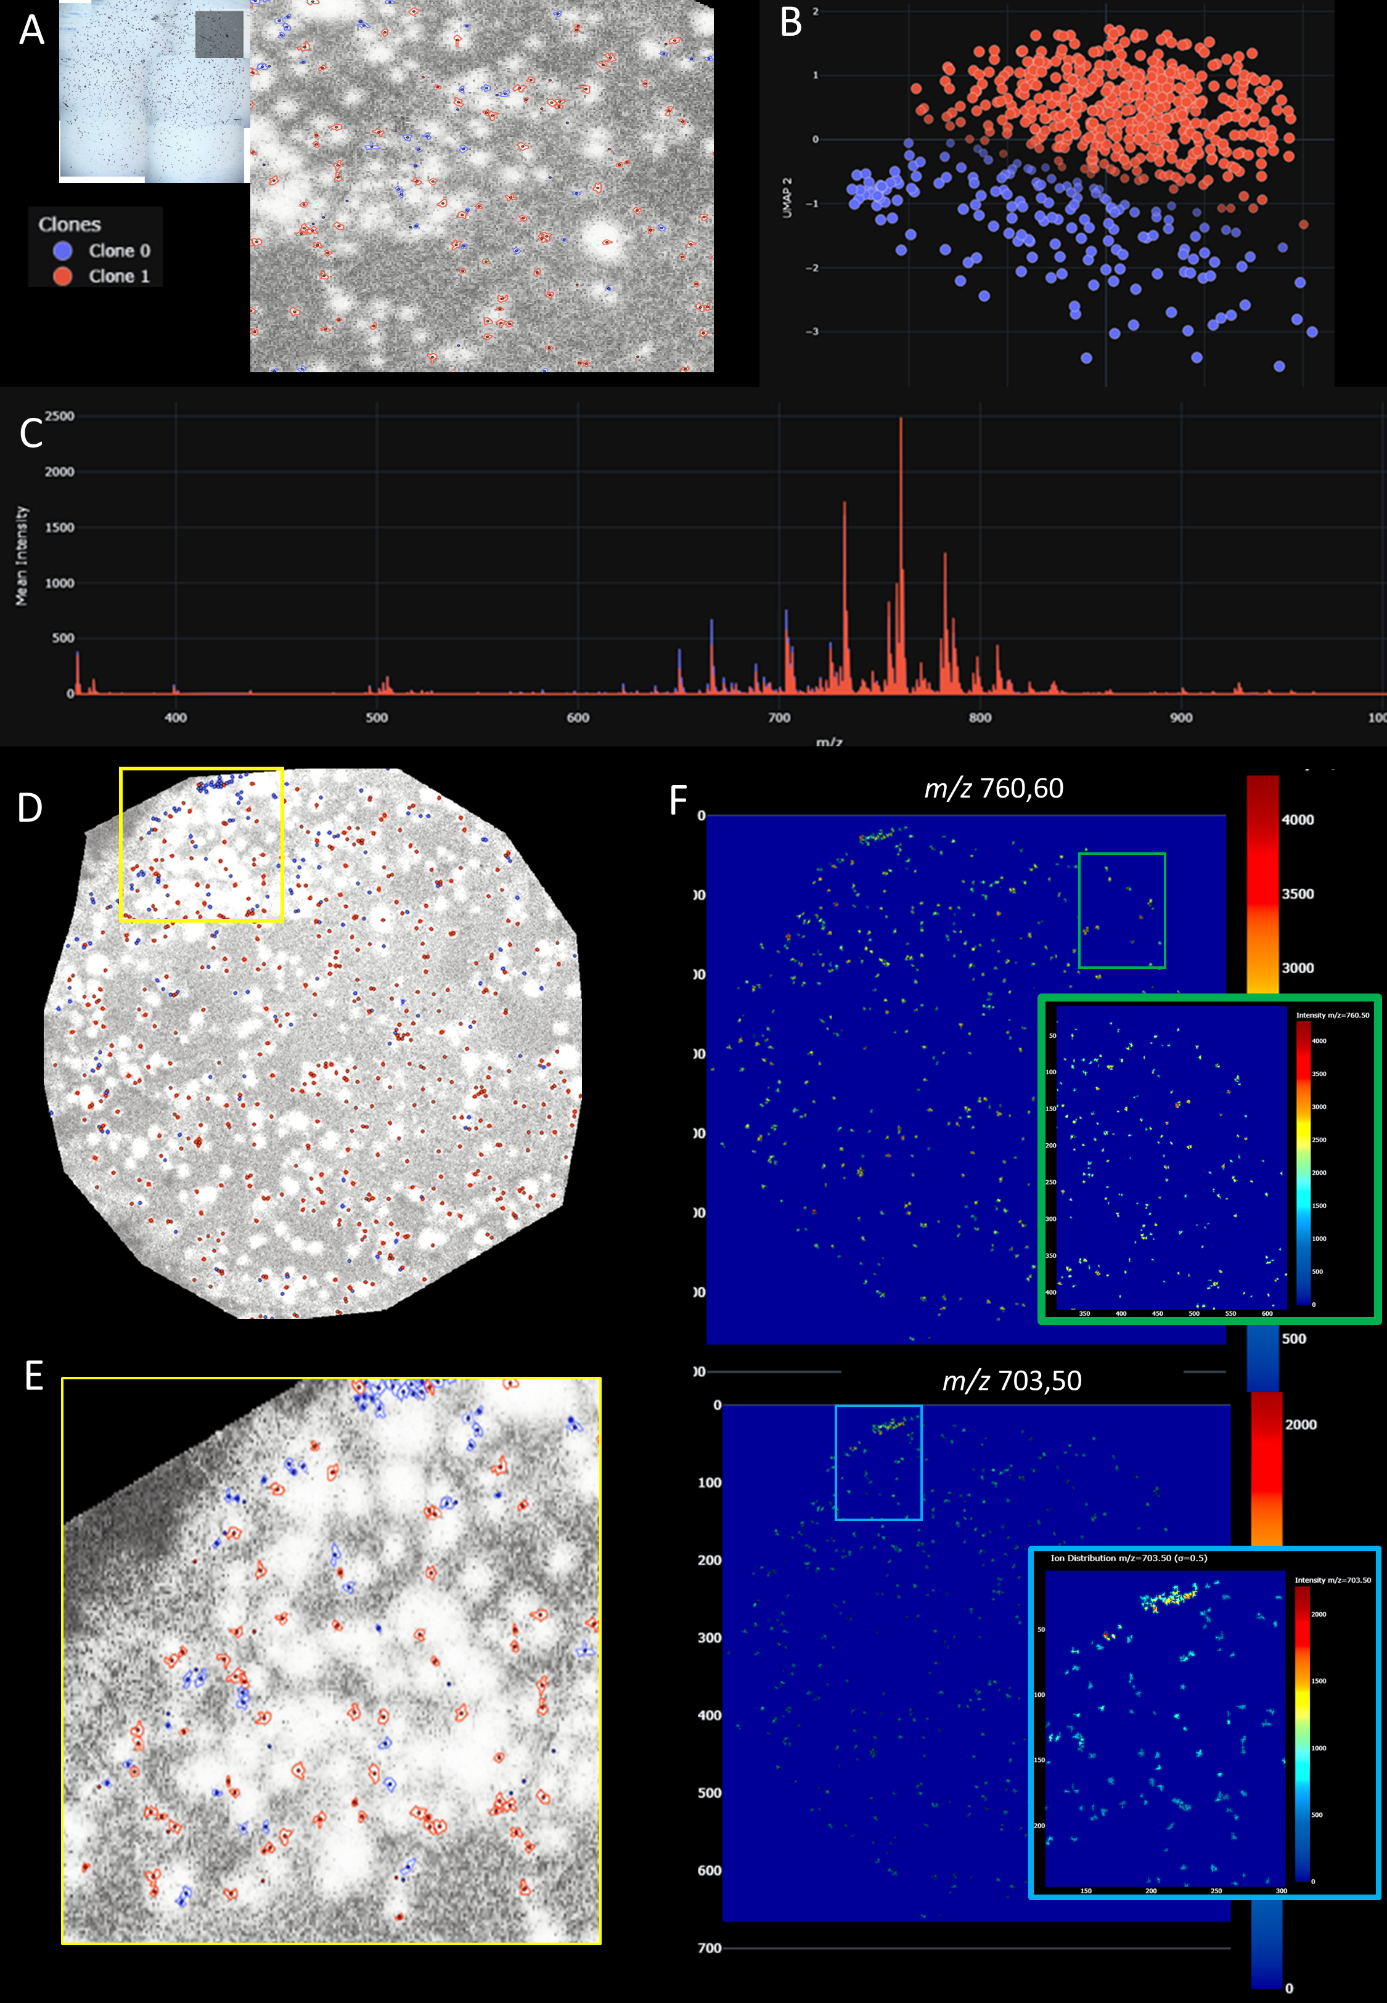


**Figure S8: Spatial and Molecular Characterization of AU565 positive-mode and Cells molecular Subpopulations.** **(A) Optical Microscopy and Cell Segmentation.** High-resolution brightfield image of AU565 cells pre-MALDI analysis. Inset shows the full sample area, while the main view displays individual cell segmentation and initial assignments based on morphological and spatial features. **(B) UMAP Visualization of Lipidomic Clusters.** Uniform Manifold Approximation and Projection (UMAP) plot showing the dimensionally reduced clustering of single-cell spectra. Cells are color-coded into two distinct molecular subpopulations (0–1), indicating metabolic heterogeneity within the AU565 population. **(C) Representative Positive Mode Mass Spectrum.** Mean intensity spectrum highlighting prominent lipid species identified in positive ion mode. Peaks are color-coded by their contribution to the specific clusters identified in Panel B. **(D) Spatial Distribution Map of molecular Subpopulations.** A reconstructed spatial map of the entire sample where each dot represents a single cell, color-coded by its molecular cell populations. The yellow box indicates the region of interest magnified in Panel E. **(E) High-Magnification Spatial ROI.** Zoomed-in view of the area highlighted in Panel D, showing the precise spatial arrangement and segmentation masks of the different AU565 subpopulations. **(F) Ion-Specific Intensity Maps.** Spatial distribution and abundance of specific lipid ions (*m/z* 760.60 and *m/z* 703.50). The heatmaps (pseudo-colored from blue to red) demonstrate how specific lipid metabolites are differentially expressed across the cell population, corresponding to the clusters identified in the UMAP.


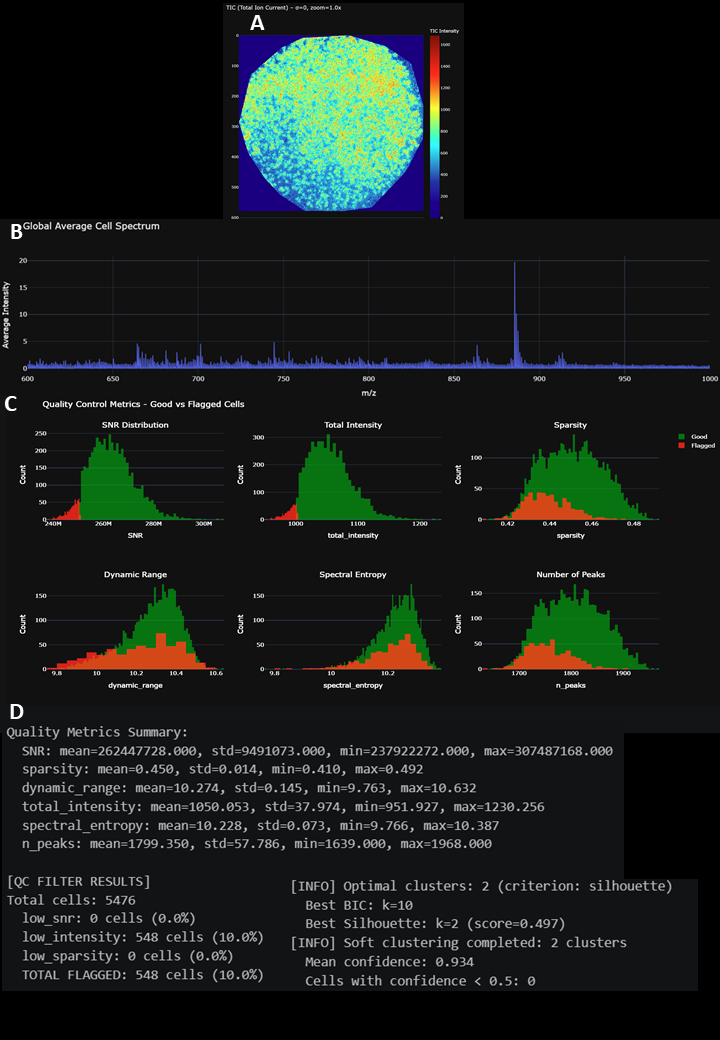


**Figure S9: Quality metrics for MDA-MB-231 negative-mode analysis.** (A) Corresponding TIC MALDI image. (B) Average mass spectrum zoomed mass range 600-1000 *m/z*. (C) Histograms of quality-control metrics. (D) Summary of quality-control results.


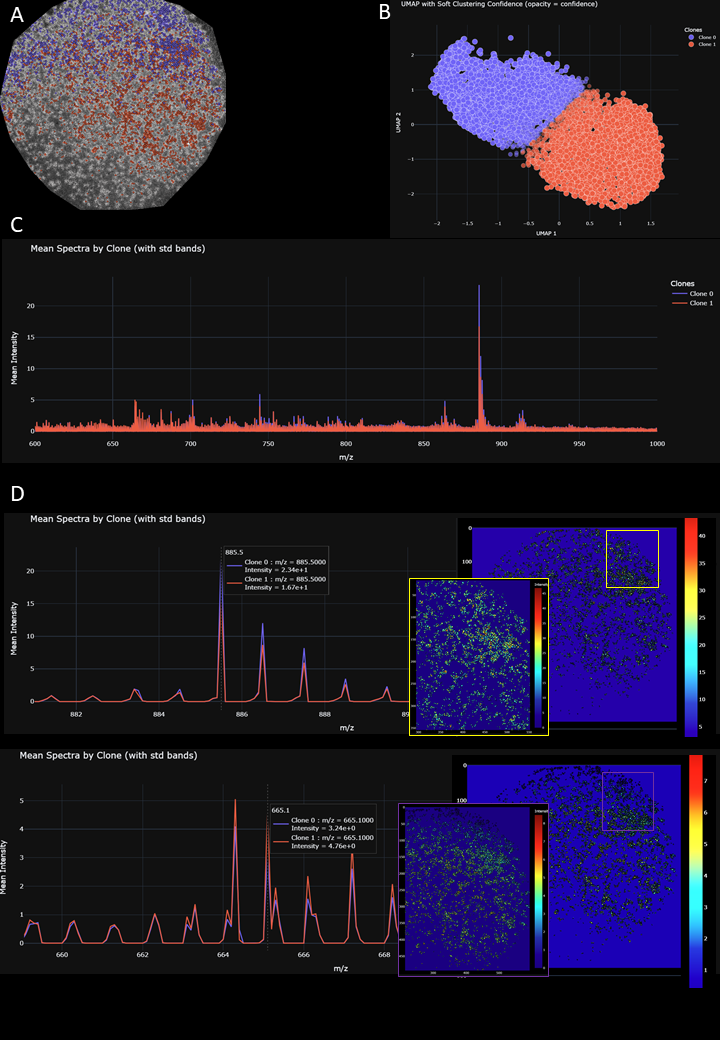


**Figure S10: Spatial and Molecular Characterization of MDA-MB-231 negative-mode and cells molecular Subpopulations.** **(A) Optical Microscopy and Cell Segmentation.** High-resolution brightfield image of MDA-MB-231 cells pre-MALDI analysis. Inset shows the full sample area, while the main view displays individual cell segmentation and initial assignments based on morphological and spatial features. **(B) UMAP Visualization of Lipidomic Clusters.** Uniform Manifold Approximation and Projection (UMAP) plot showing the dimensionally reduced clustering of single-cell spectra. Cells are color-coded into two distinct molecular subpopulations (0–1), indicating metabolic heterogeneity within the MDA-MB-231 population. **(C) Representative Negative Mode Mass Spectrum.** Mean intensity spectrum highlighting prominent lipid species identified in negative ion mode. Peaks are color-coded by their contribution to the specific clusters identified in Panel B. **(D) Ion-Specific Intensity Maps.** Mean spectra and spatial distribution with abundance of specific lipid ions (*m/z* 885.55 and *m/z* 665.10). The heatmaps (pseudo-colored from blue to red) demonstrate how specific lipid metabolites are differentially expressed across the cell population, corresponding to the clusters identified in the UMAP.


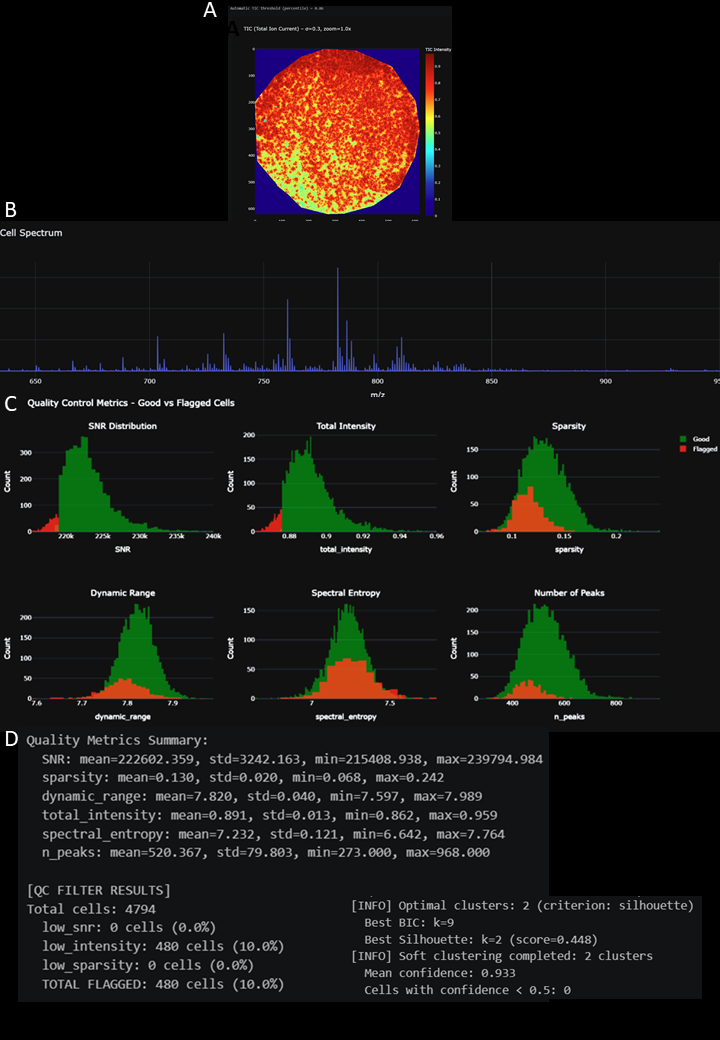


**Figure S11: Quality metrics for MDA-MB-231 positive-mode analysis.** (A) Corresponding TIC MALDI image. (B) Average mass spectrum zoomed mass range 600-1000 *m/z*. (C) Histograms of quality-control metrics. (D) Summary of quality-control results.


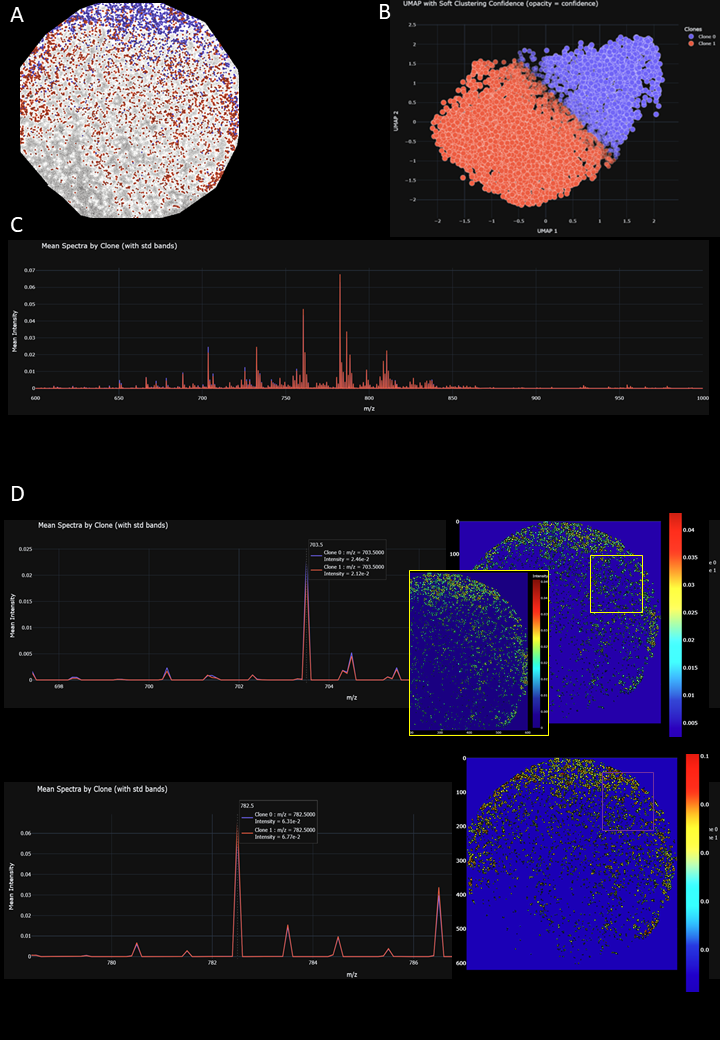


**Figure S12: Spatial and Molecular Characterization of MDA-MB-231 positive-mode and cells molecular Subpopulations.** **(A) Optical Microscopy and Cell Segmentation.** High-resolution brightfield image of MDA-MB-231 cells pre-MALDI analysis. Inset shows the full sample area, while the main view displays individual cell segmentation and initial assignments based on morphological and spatial features. **(B) UMAP Visualization of Lipidomic Clusters.** Uniform Manifold Approximation and Projection (UMAP) plot showing the dimensionally reduced clustering of single-cell spectra. Cells are color-coded into two distinct molecular subpopulations (0–1), indicating metabolic heterogeneity within the MDA-MB-231 population. **(C) Representative Positive Mode Mass Spectrum.** Mean intensity spectrum highlighting prominent lipid species identified in positive ion mode. Peaks are color-coded by their contribution to the specific clusters identified in Panel B. **(D) Ion-Specific Intensity Maps.** Mean spectra and spatial distribution with abundance of specific lipid ions (*m/z* 703.50 and *m/z* 782.50). The heatmaps (pseudo-colored from blue to red) demonstrate how specific lipid metabolites are differentially expressed across the cell population, corresponding to the clusters identified in the UMAP.


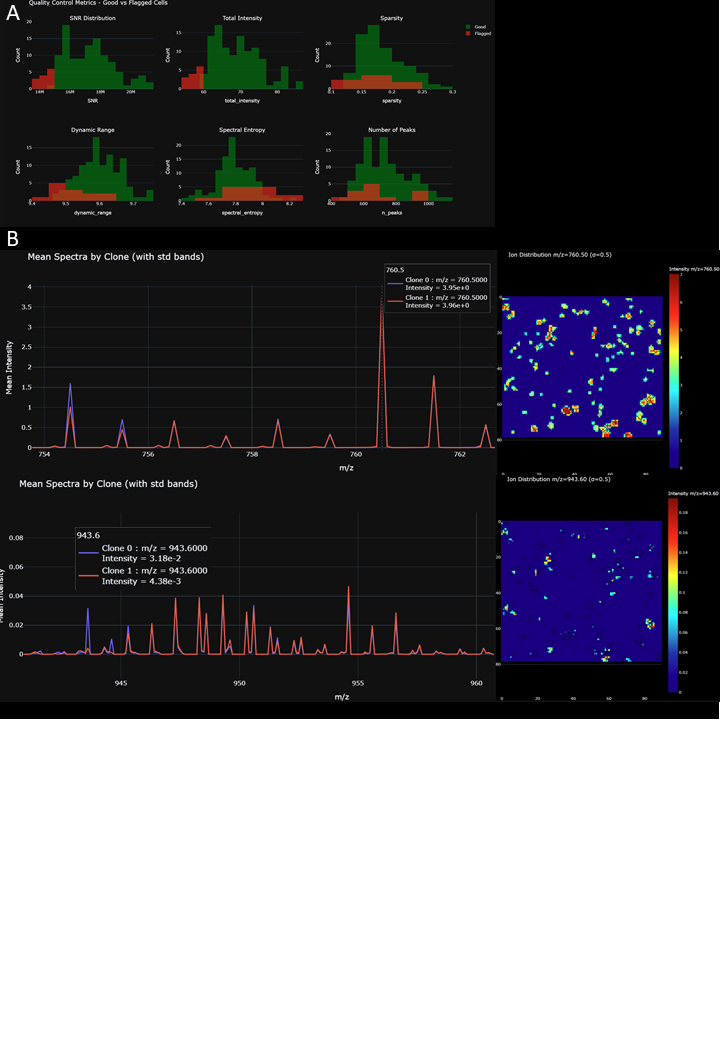


**Figure S13: Quality control histograms and ion spatial maps for the binary NCH82/AU565 co-deposition (positive mode).** (**A**) Histograms of quality-control metrics. **(B) Ion-Specific Intensity Maps.** Mean spectra and spatial distribution with abundance of specific lipid ions (*m/z* 760.50 and *m/z* 943.60). The heatmaps (pseudo-colored from blue to red) demonstrate how specific lipid metabolites are differentially expressed across the cell population, corresponding to the clusters identified in the UMAP (**Figure 4**).


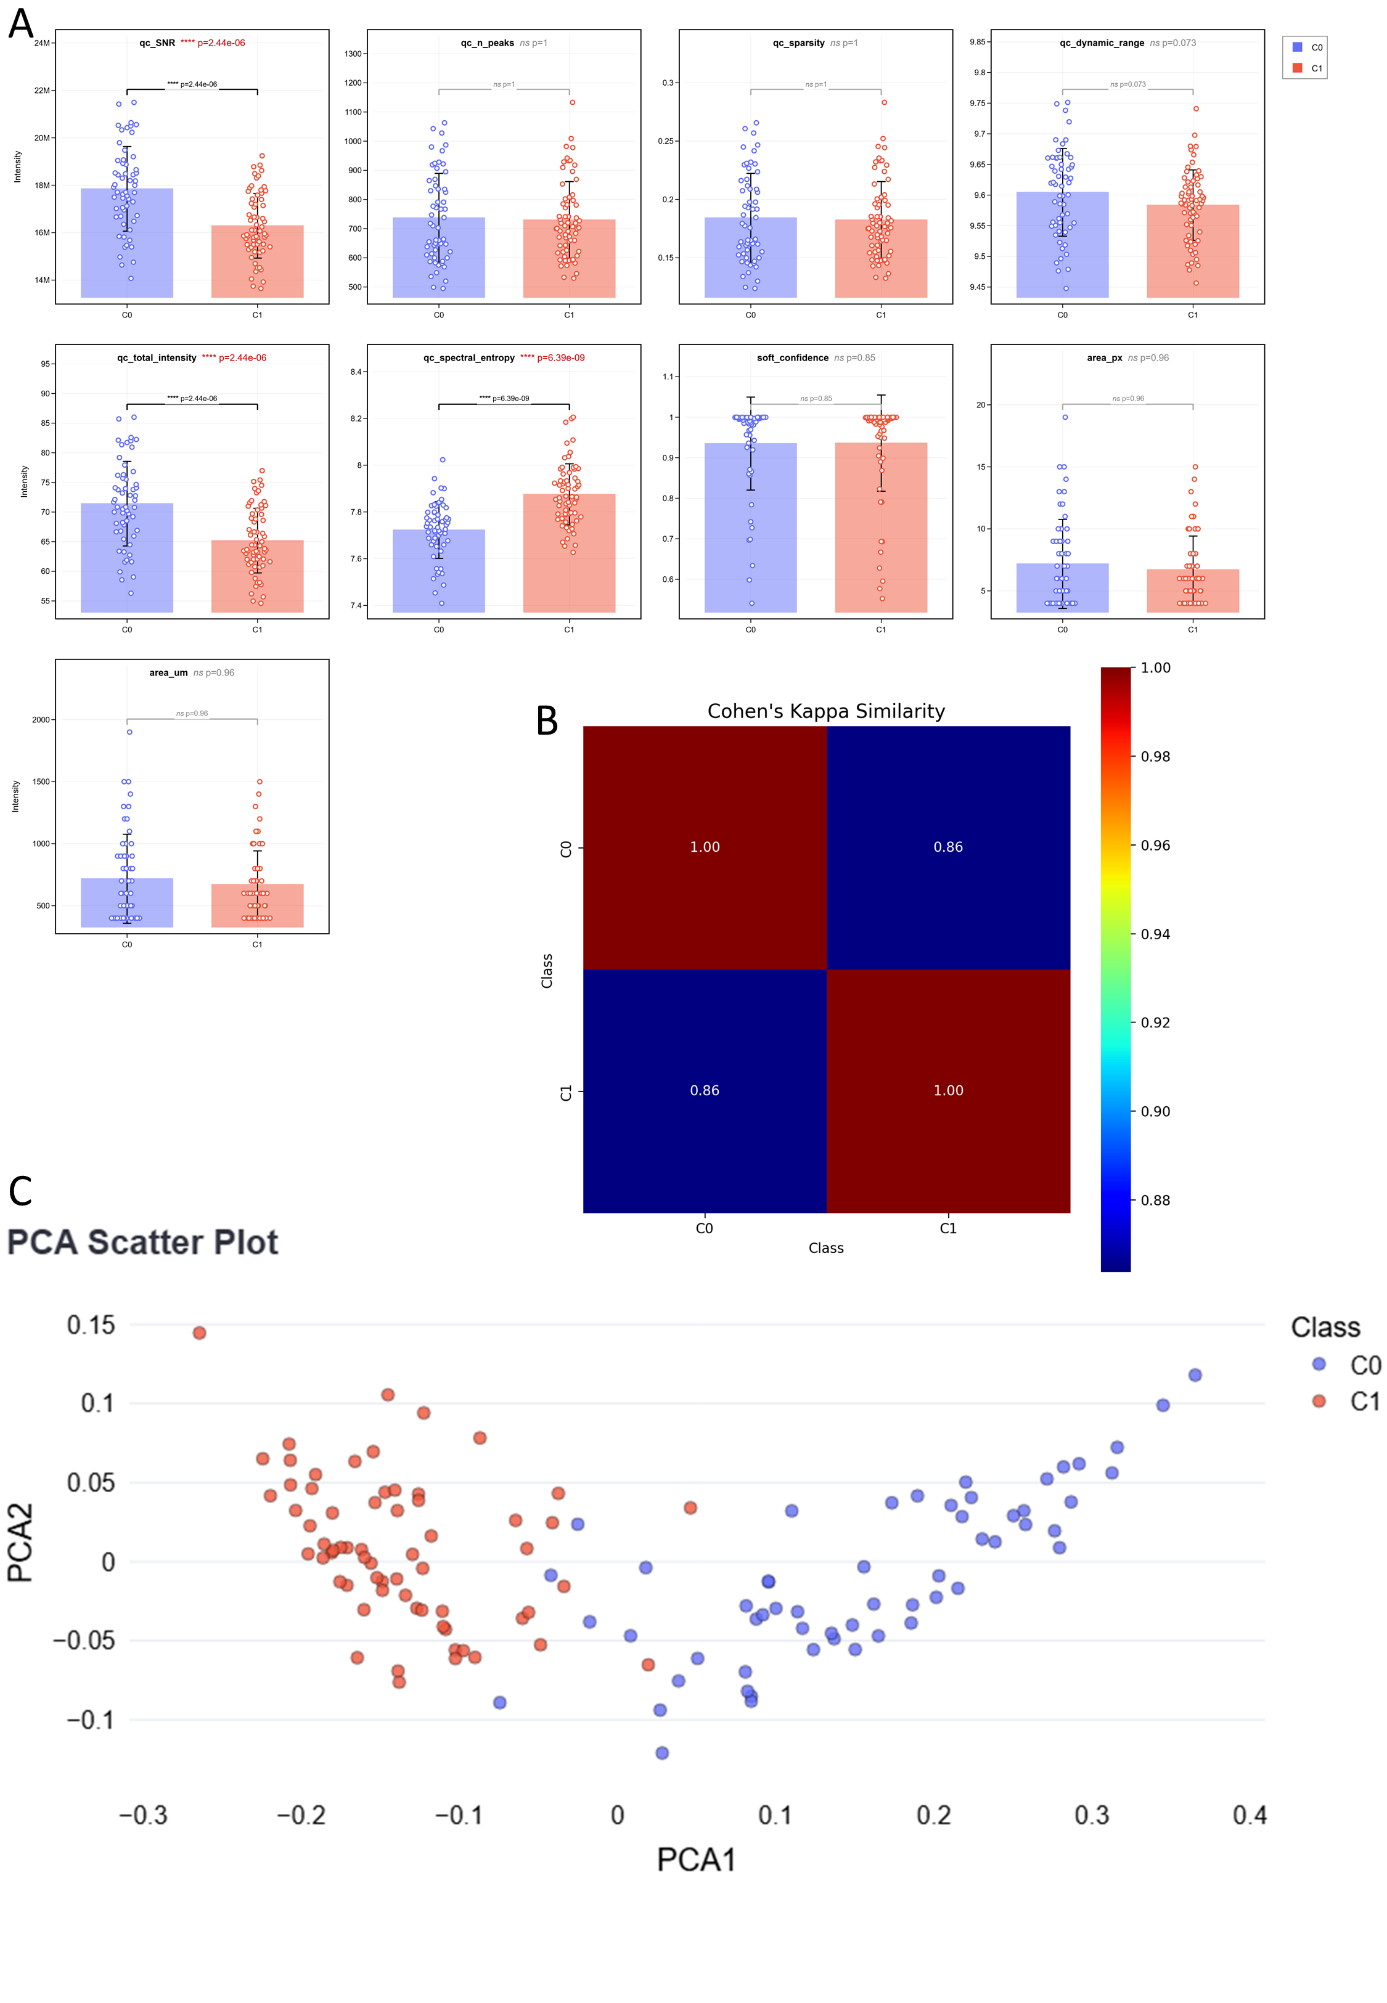


**Figure S14: Cluster-level statistical analysis of the binary NCH82/AU565 mixture (positive mode): QC metrics per cluster, Cohen’s kappa spectral similarity, and PCA projection.*.***(**A**) Histograms of quality-control metrics, **(B)** Cohen’s kappa similarityand **(C)** PCA scatter plot of C0 and C1 clusters.


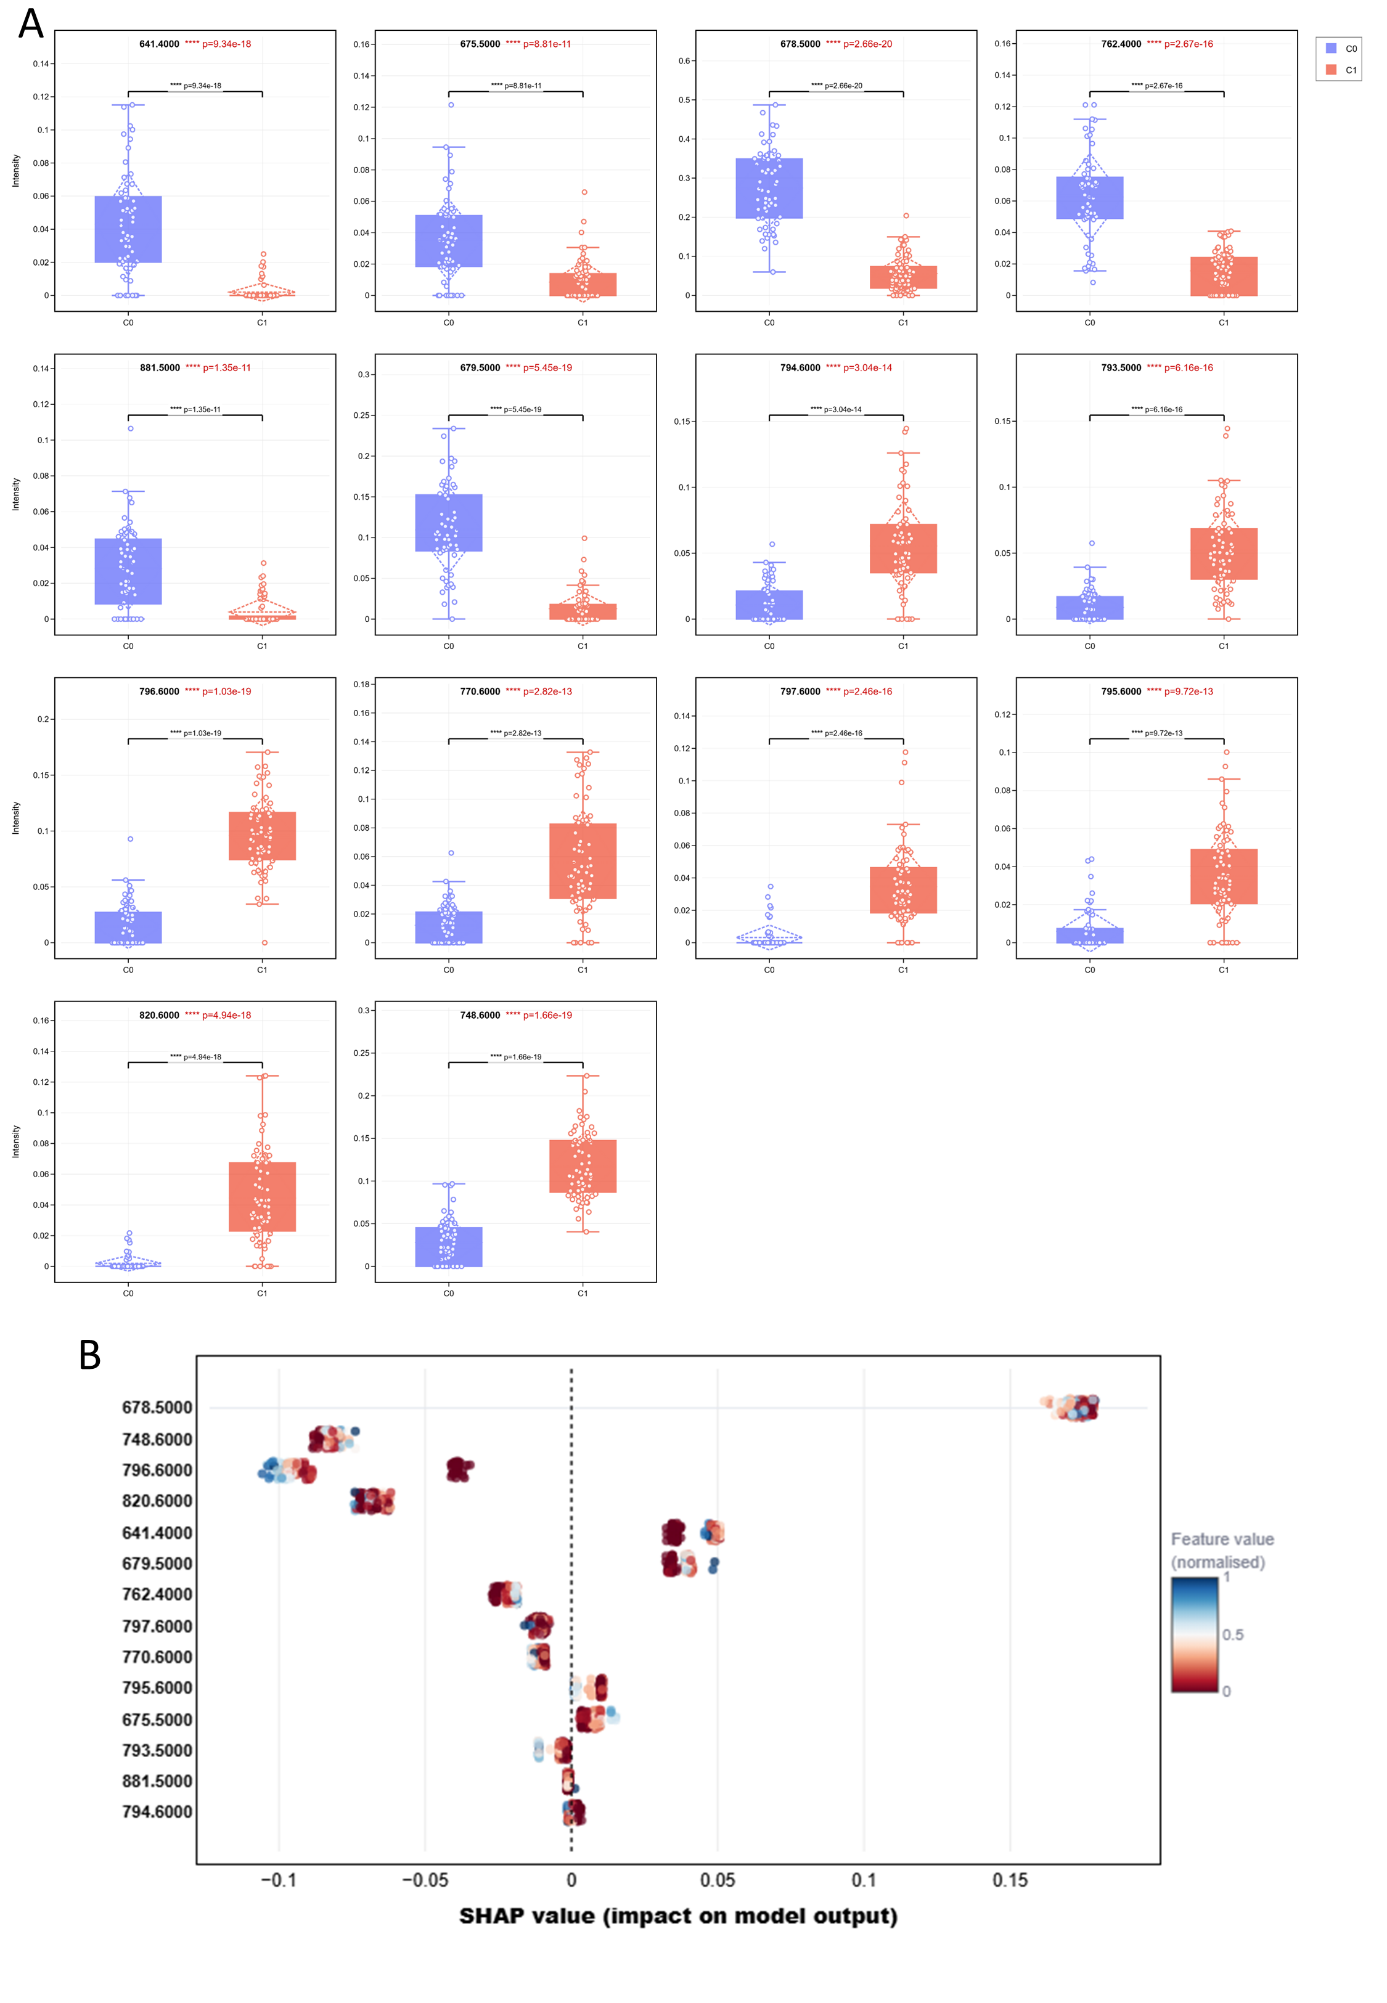


**Figure S15**: **Feature importance analysis for the binary NCH82/AU565 mixture (positive mode): per-cluster ion boxplots and SHAP beeswarm for the Random Forest classifier**. (**A**) Specific ions box plots for C0 and C1 clusters. (**B**) SHAP beeswarm.


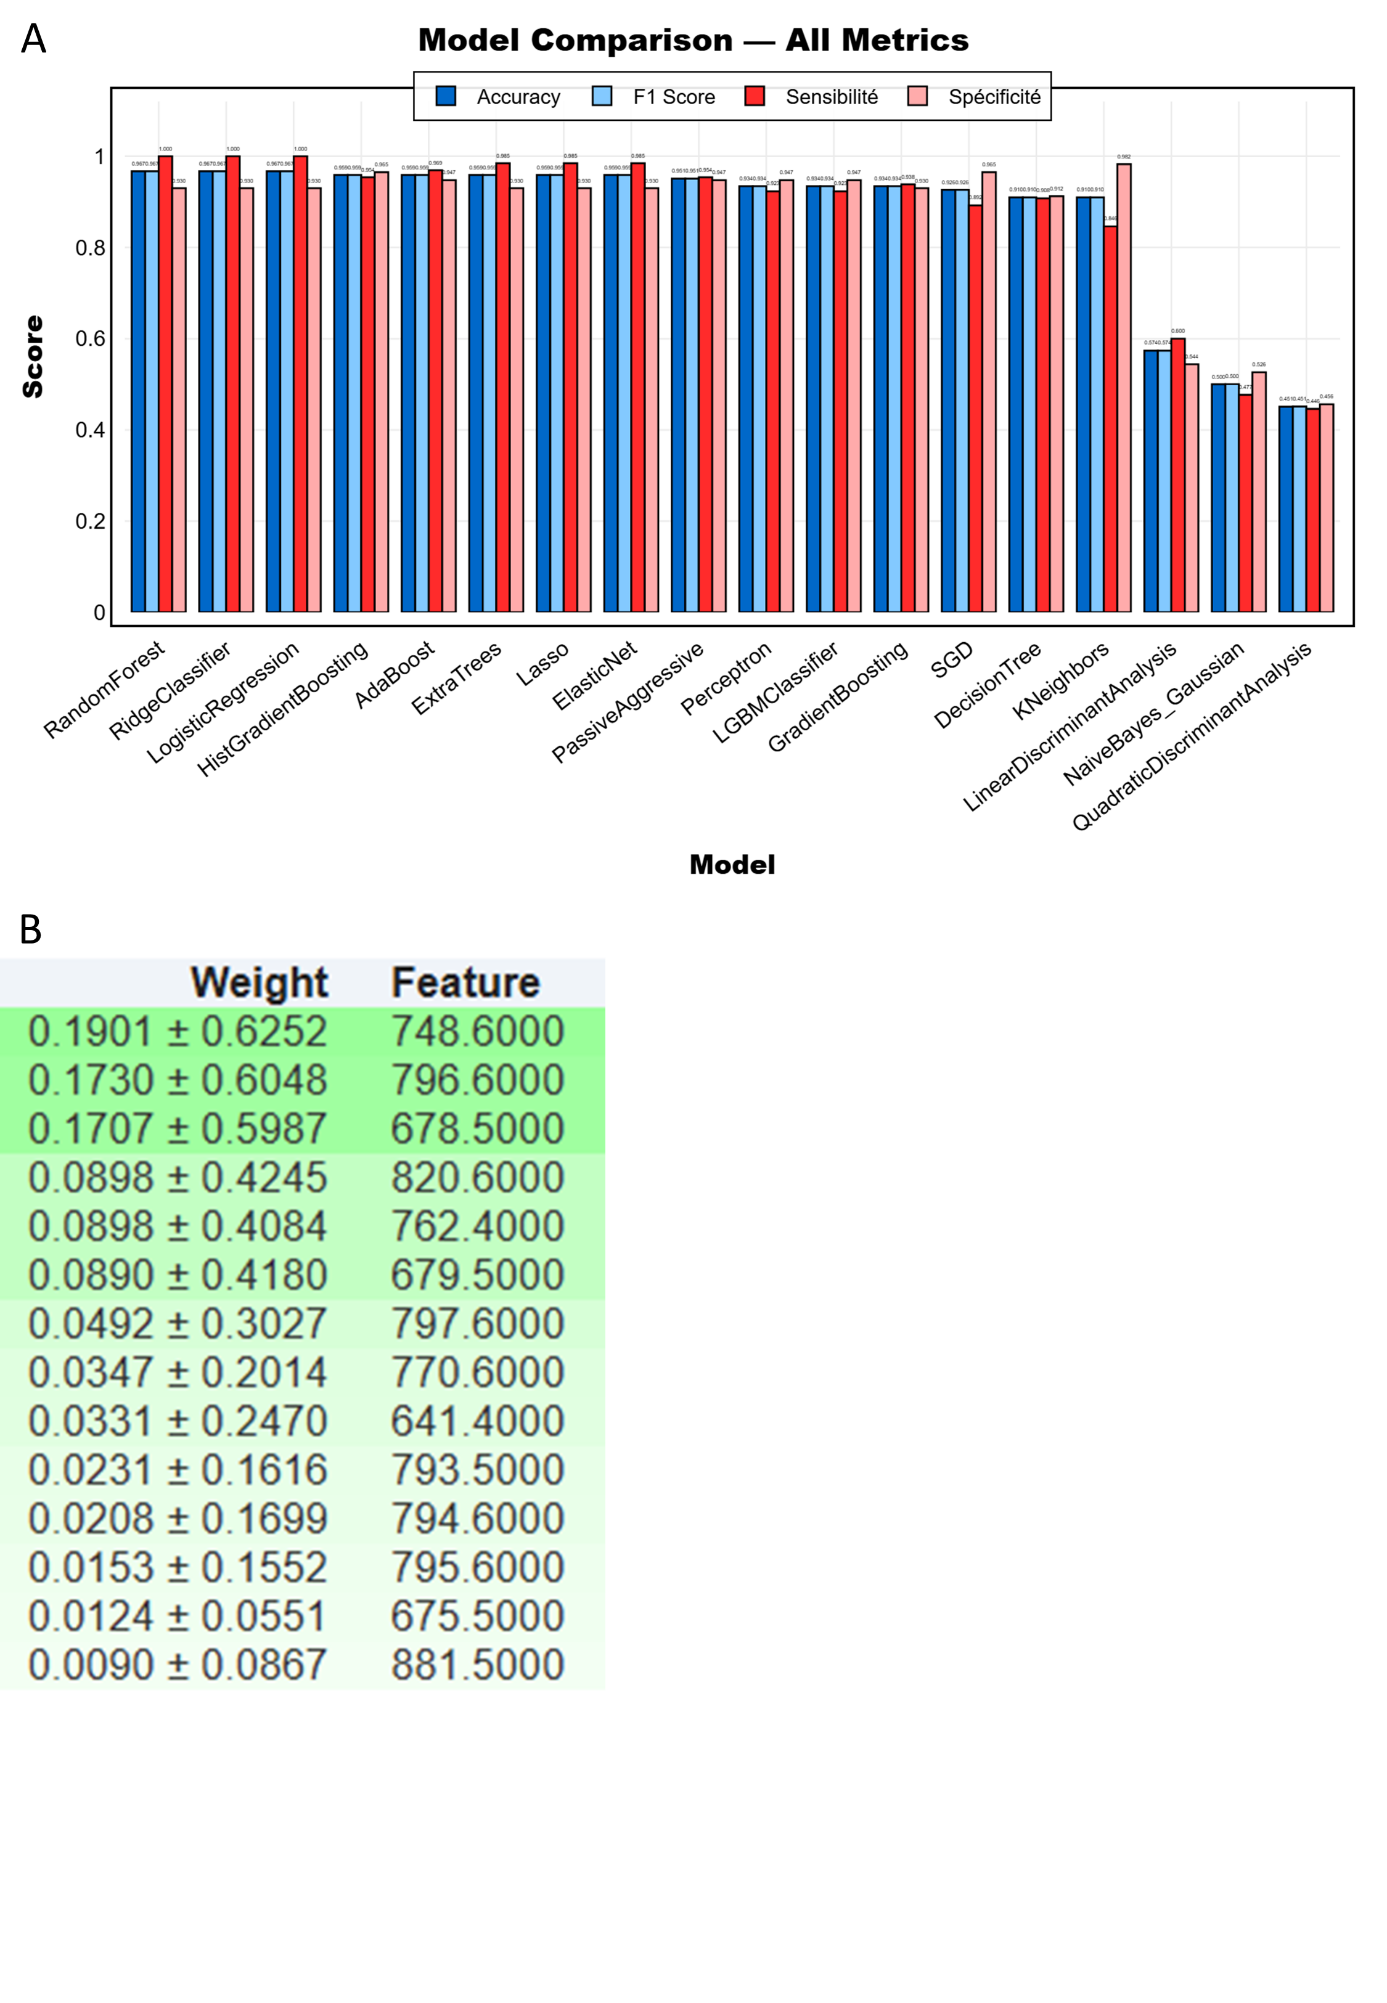


**Figure S16: Machine learning model comparison and LIME feature importance for the binary NCH82/AU565 mixture (positive mode)..** (**A**) Machine learning model comparison. **(B)** LIME specific ions.


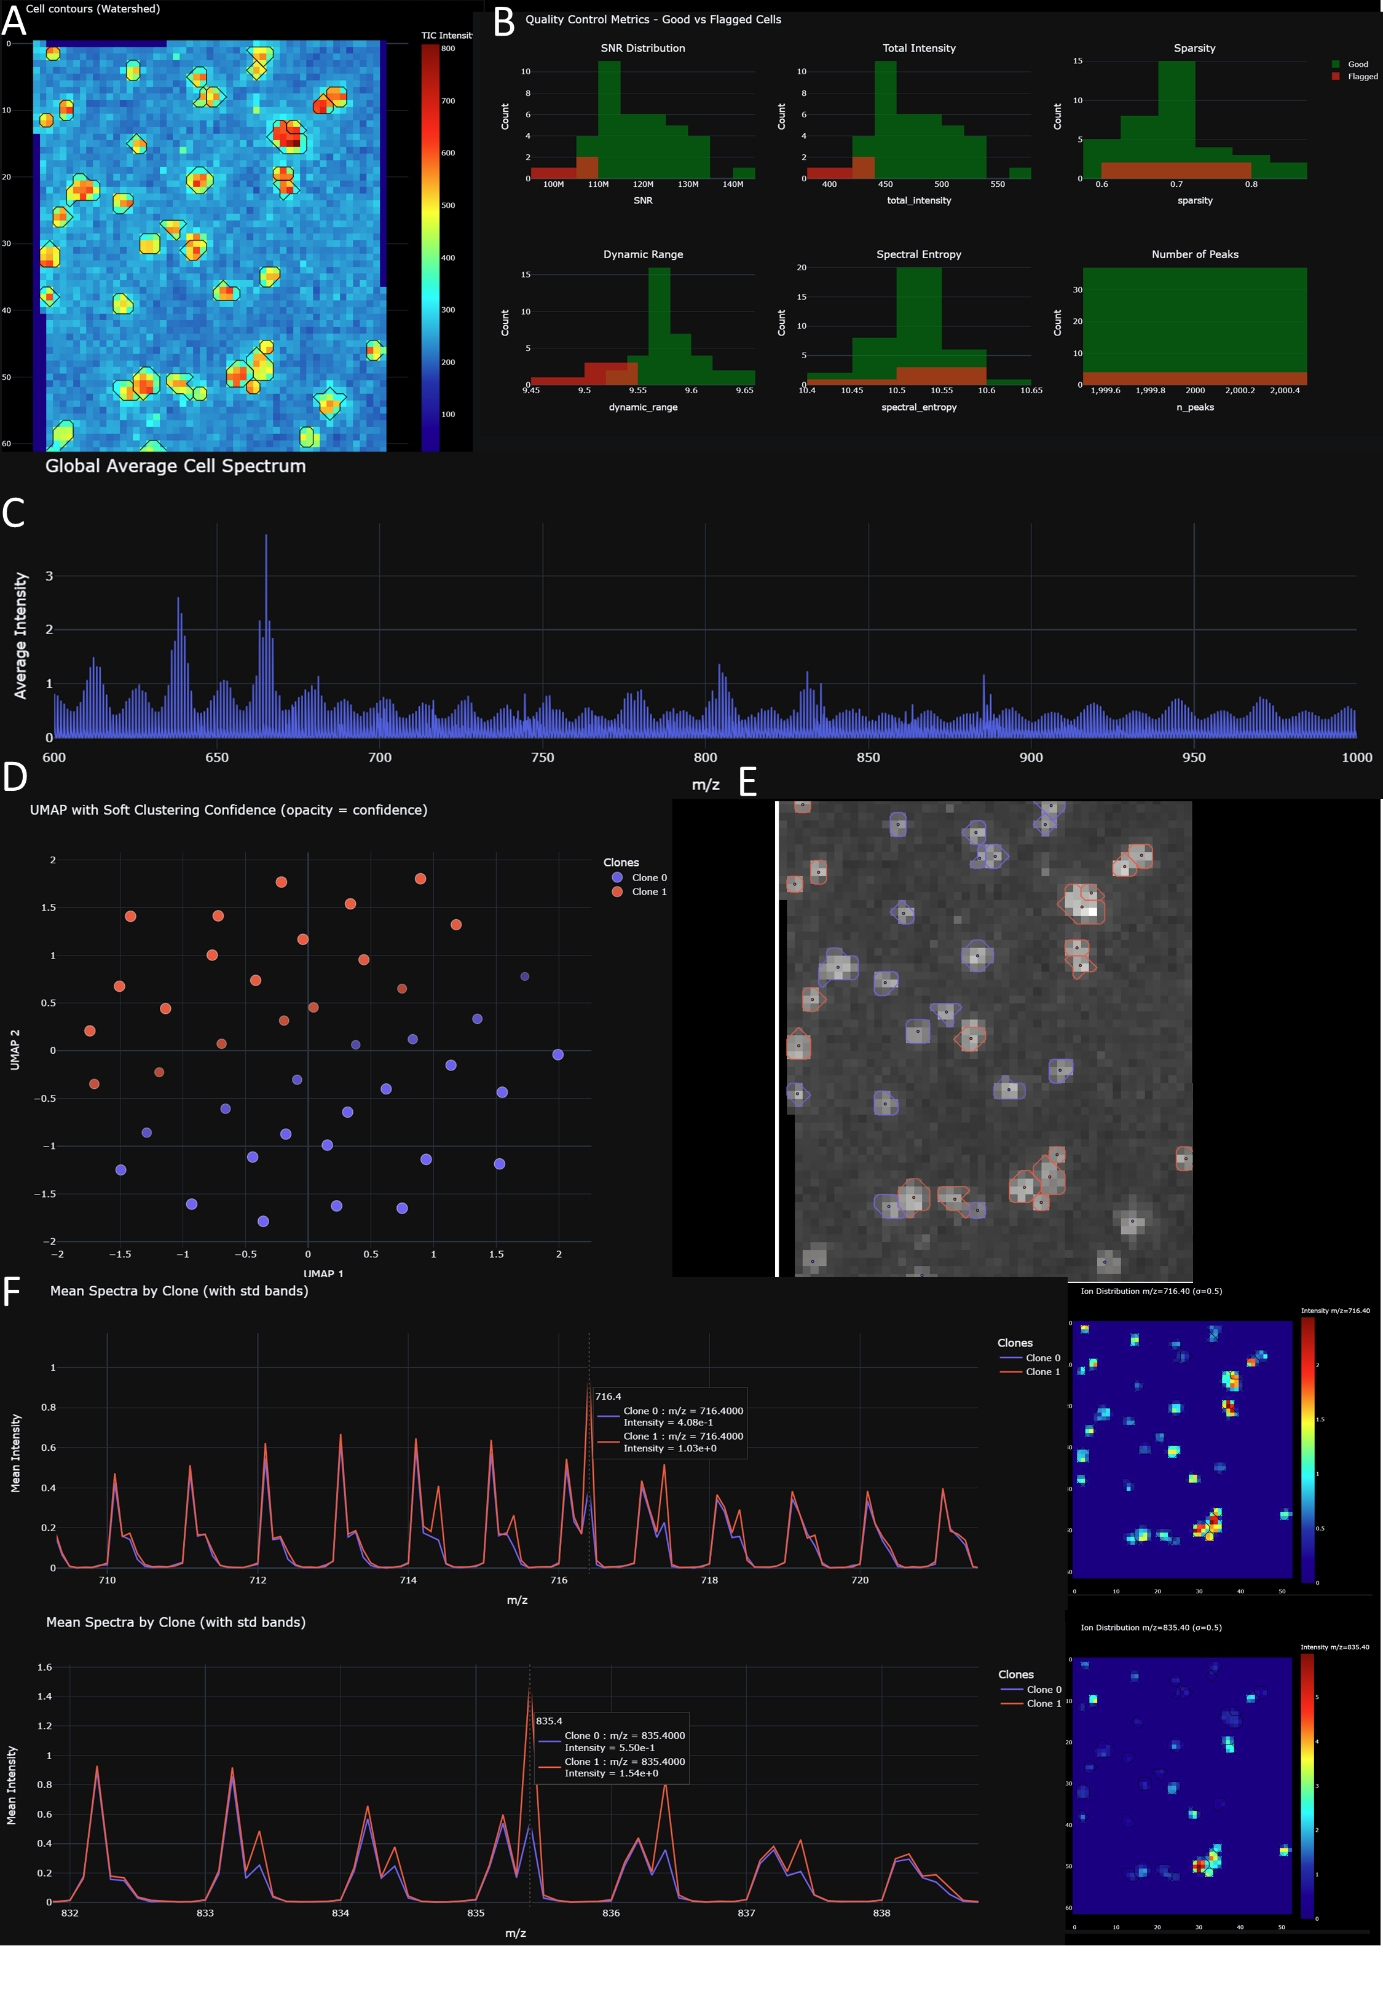


**Figure S17: Spatial and Molecular Characterization of AU565 mixed with NCH82 negative-mode.** (**A**) TIC map with watershed-based cell contours delineated across the mixed NCH82/AU565 cytospin preparation. (**B**) Histograms of quality-control metrics. (**C**) Global average mass spectrum computed across all retained cells (*m/z* 350–1050). (**D**) UMAP projection with soft clustering confidence revealing two distinct subpopulations: C0, blue and C1, red. (**E**) Spatial back-projection of cluster assignments onto the MSI acquisition area, confirming stochastic intermingling of C0 and C1 cells. (**F**) Ion-Specific Intensity Maps. Spatial distribution and abundance of specific lipid ions (*m/z* 716.40 and m/z 835.40). The heatmaps (pseudo-colored from blue to red) demonstrate how specific lipid metabolites are differentially expressed across the cell population, corresponding to the clusters identified in the UMAP (**Figure 4**).


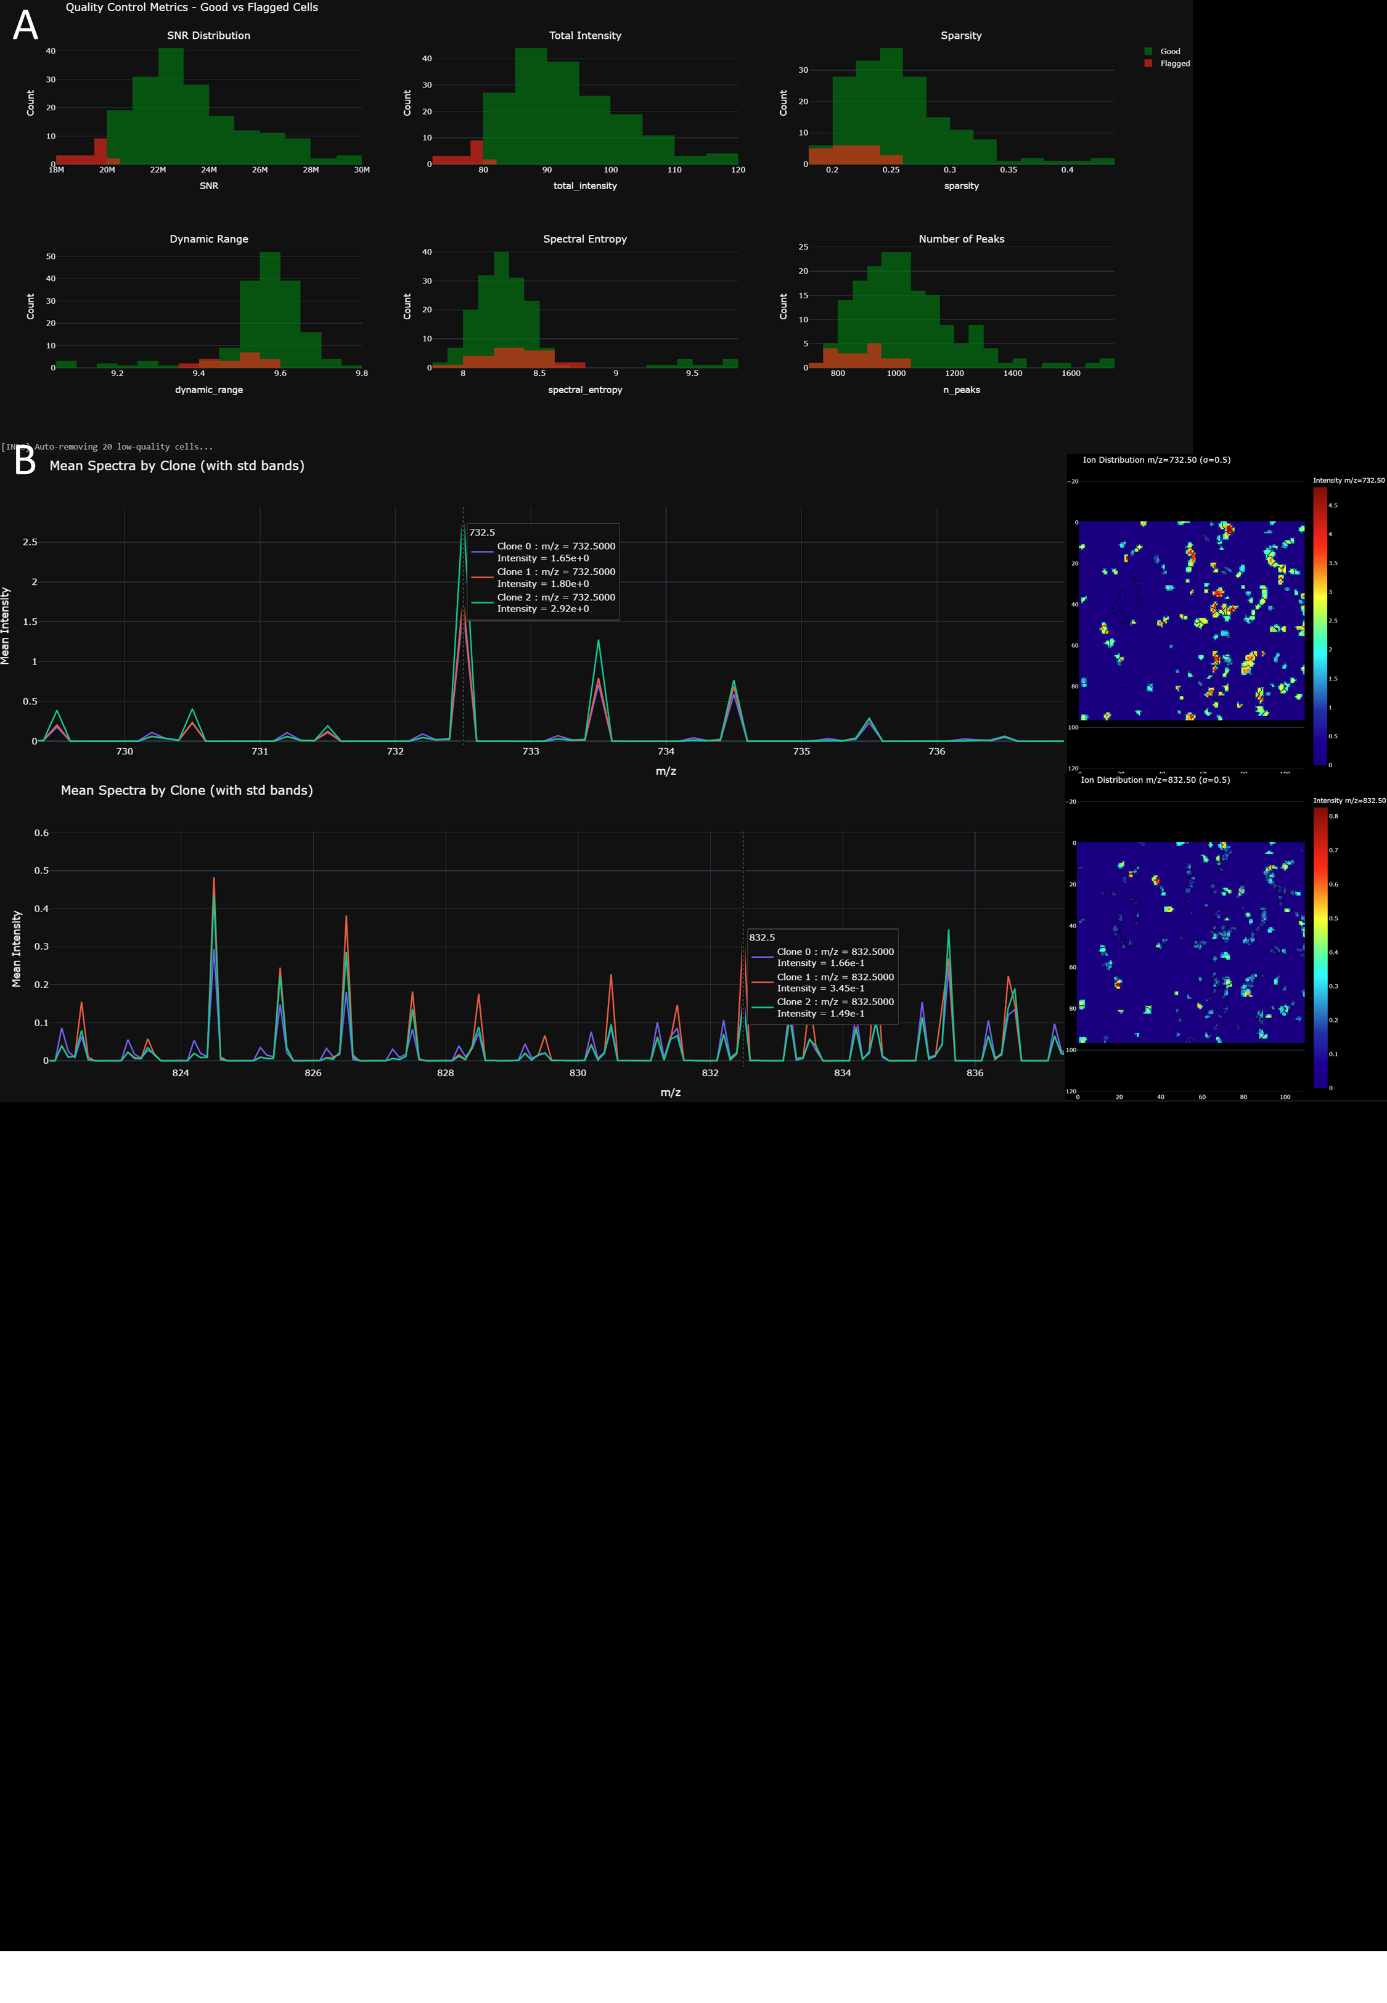


**Figure S18: Spatial and Molecular Characterization of AU565 mixed with MCF7 and MDA231 positive-mode*.***(**A**) Histograms of quality-control metrics. **(B) Ion-Specific Intensity Maps.** Spatial distribution and abundance of specific lipid ions (*m/z* 732.50 and *m/z* 832.50). The heatmaps (pseudo-colored from blue to red) demonstrate how specific lipid metabolites are differentially expressed across the cell population, corresponding to the clusters identified in the UMAP (**Figure 5**).


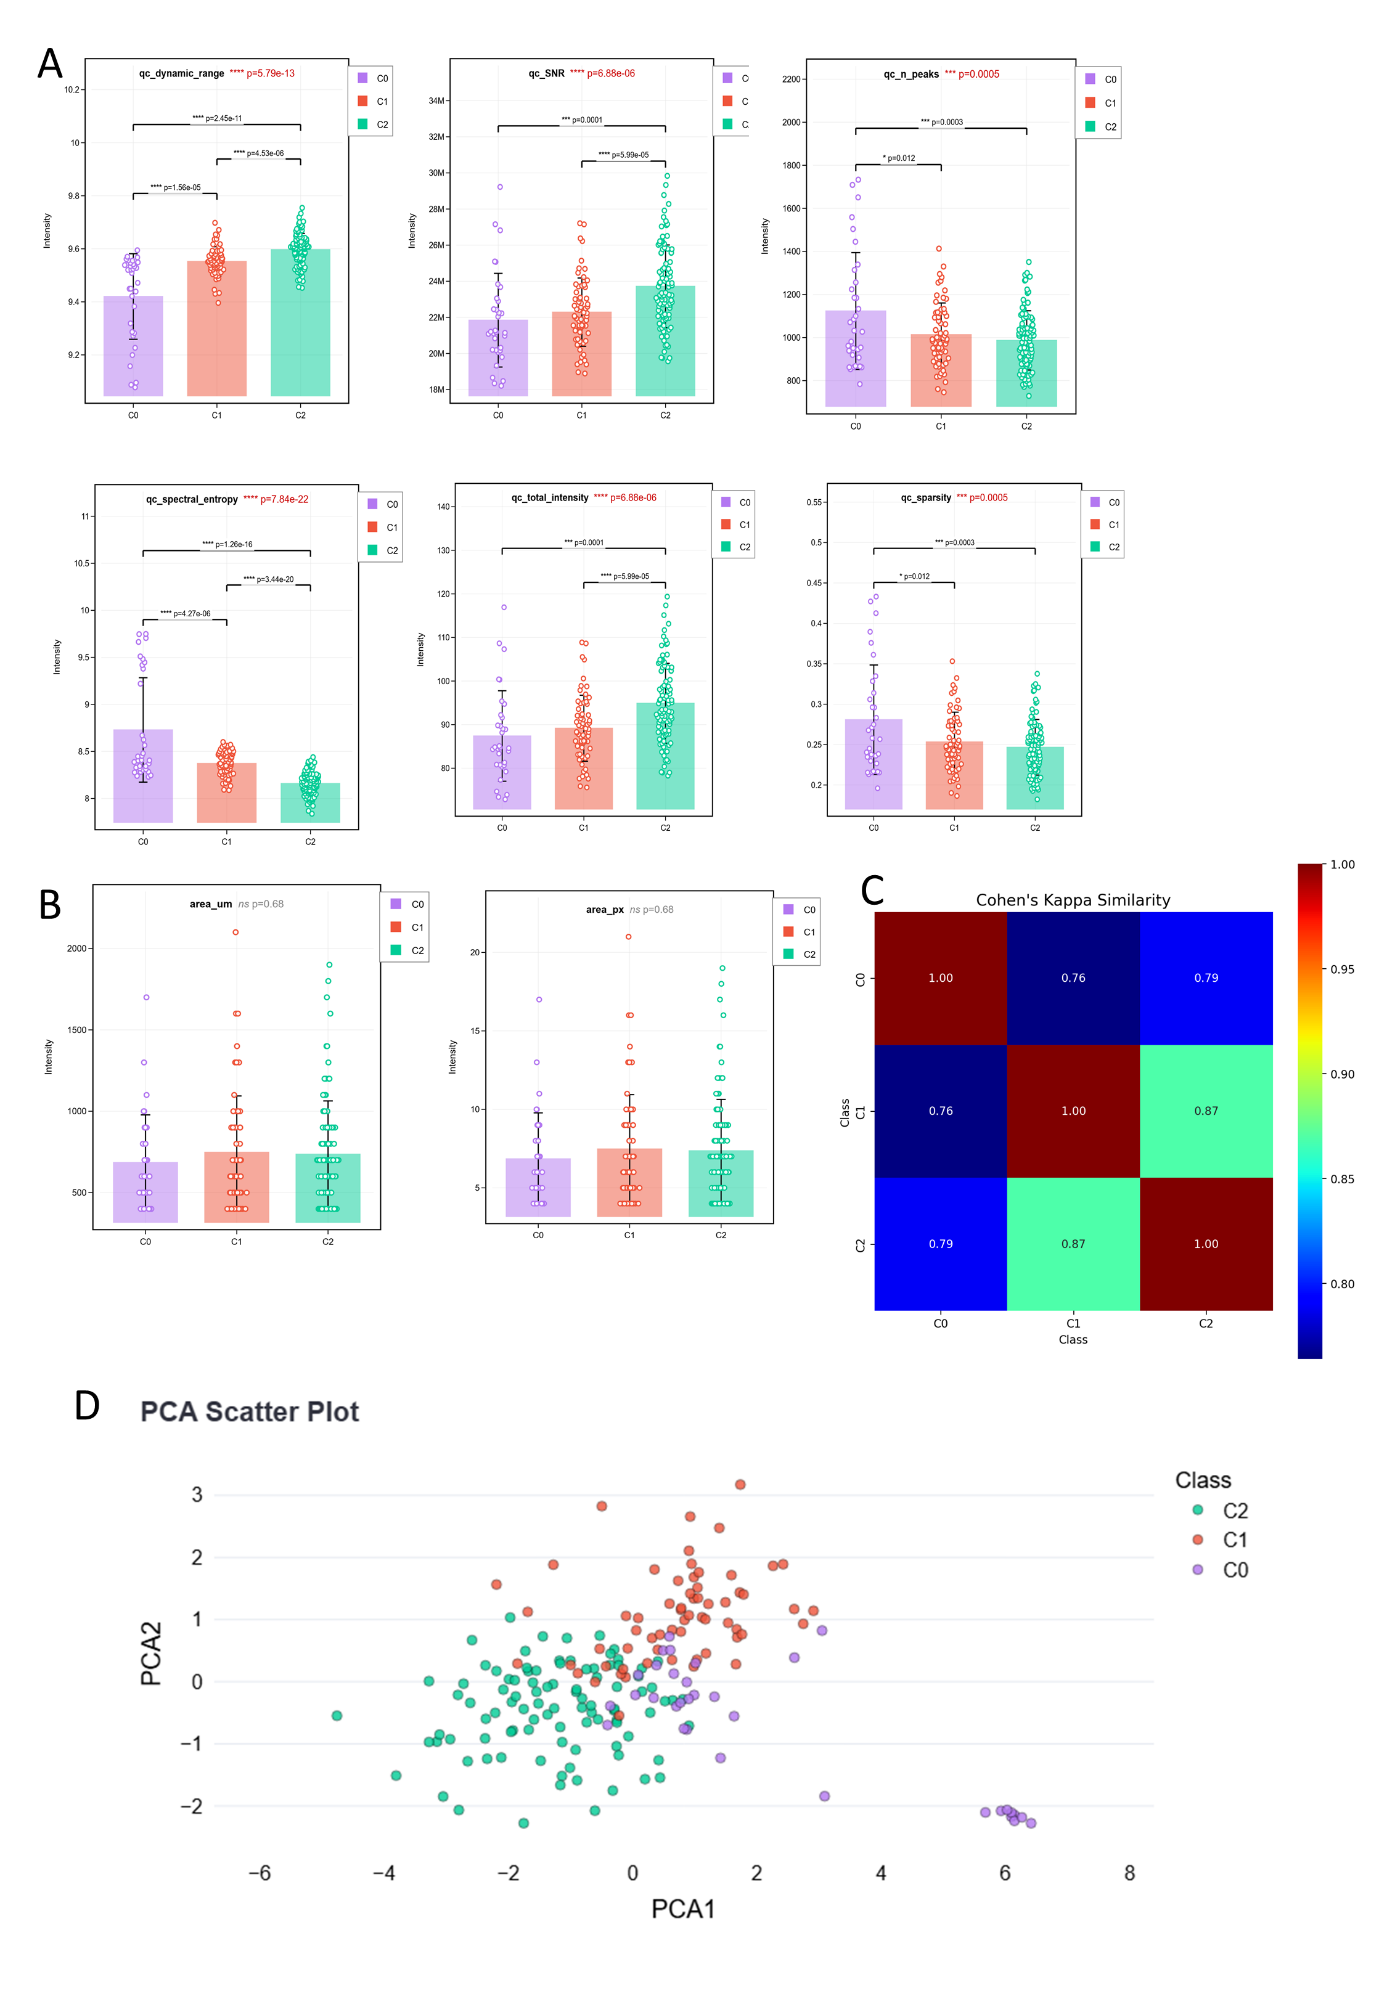


**Figure S19: *Spatial and Molecular Characterization of* AU565 mixed with MCF7 and MDA-MB-231 positive-mode CSV analysis*.***(**A**) Histograms of quality-control metrics within C0 and C1 clusters. (**B**) Area cell plot. (**C**) Cohen’s kappa similarity. (**D**) PCA scatter plot.


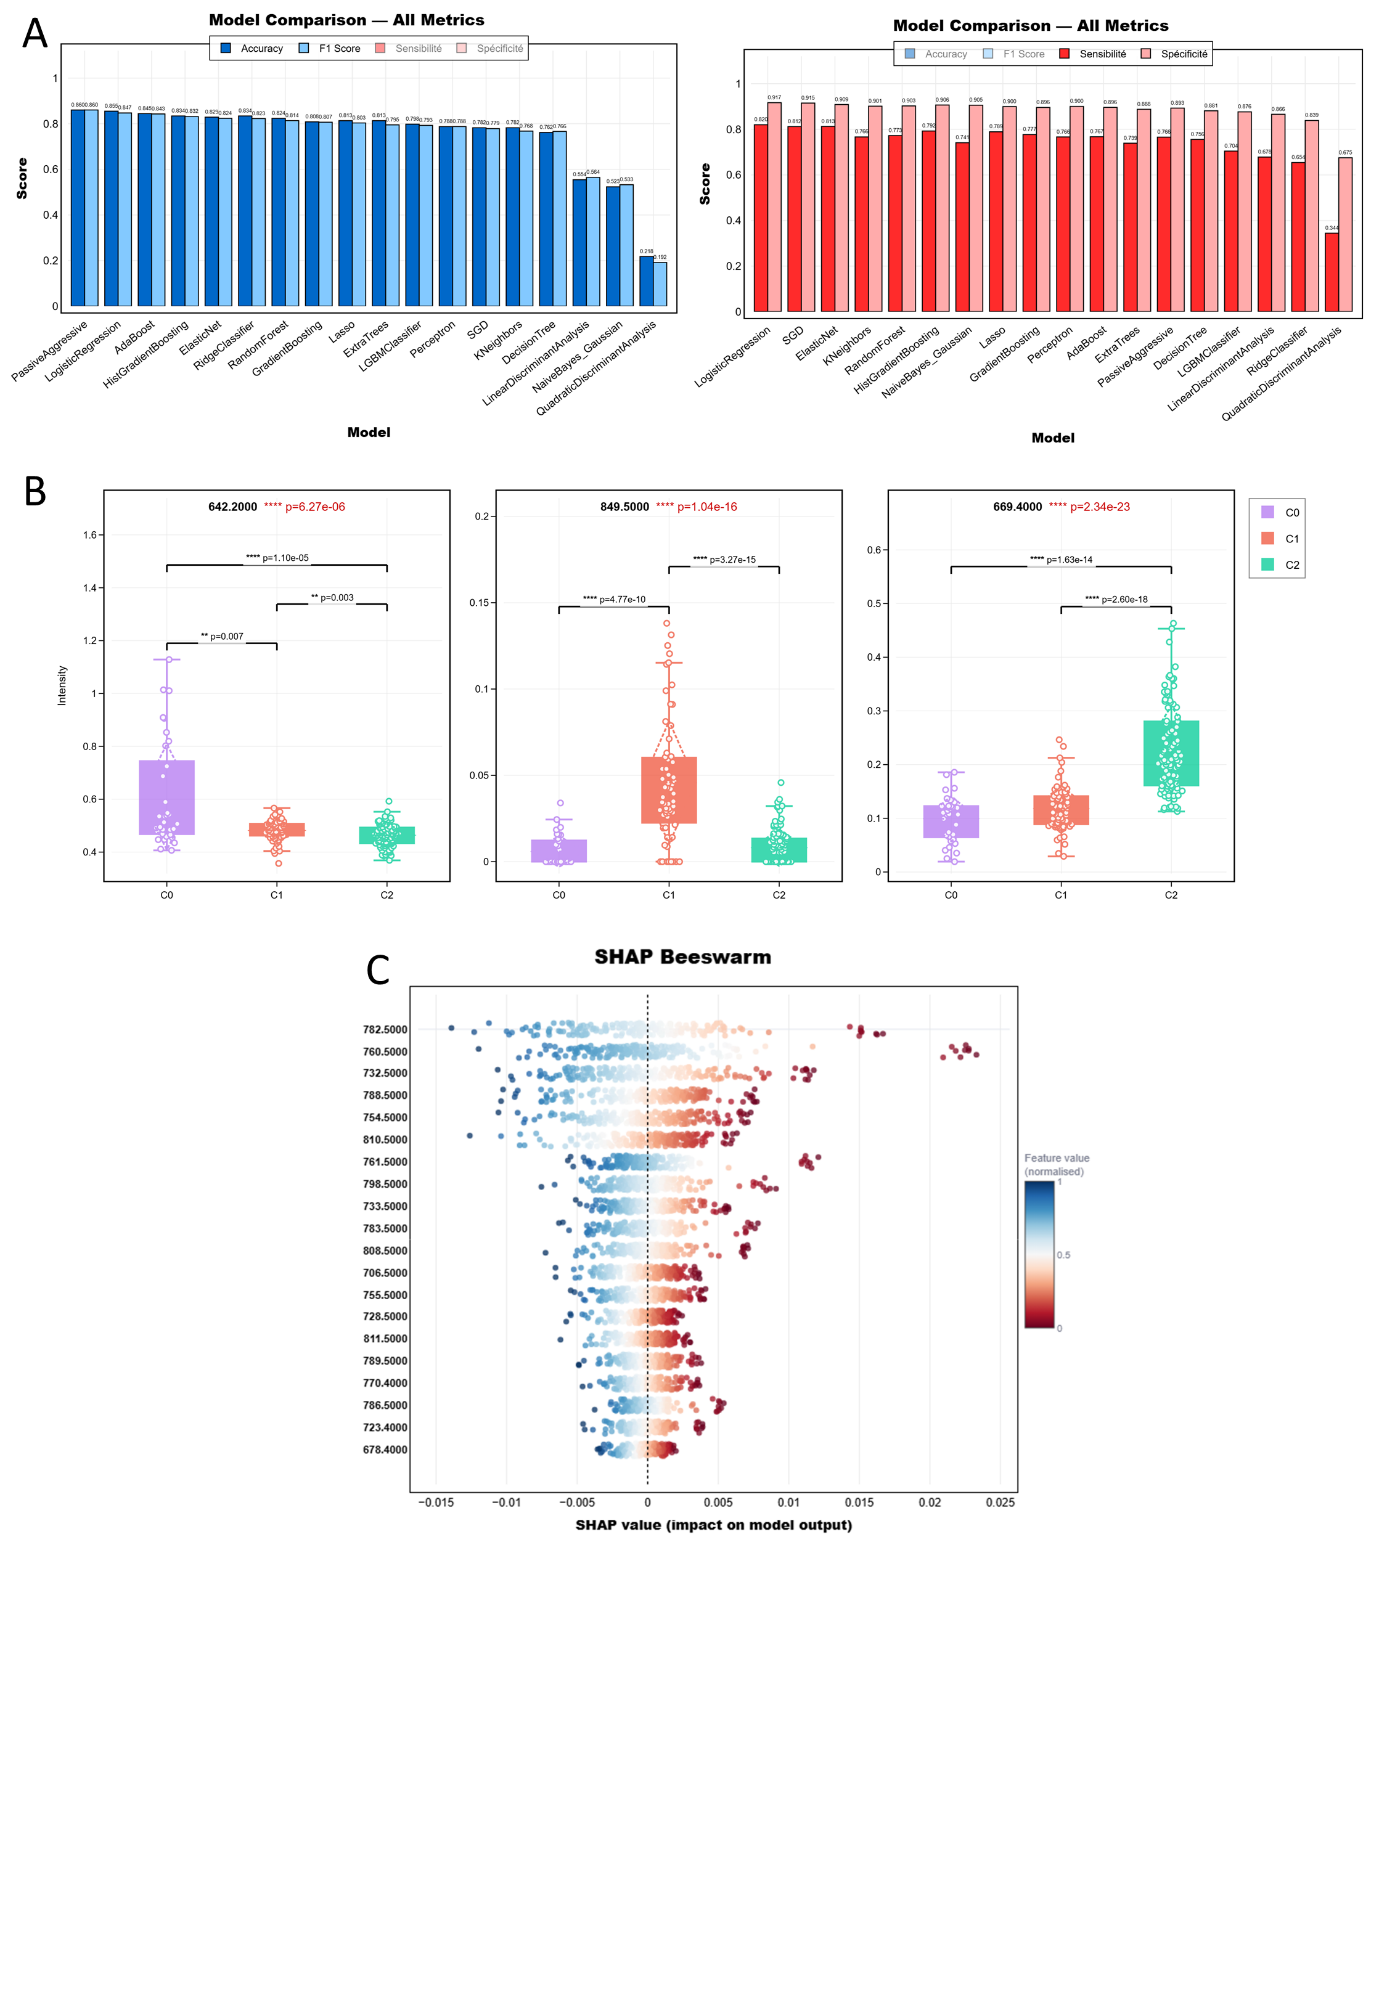


**Figure S20: Spatial and Molecular Characterization of AU565 mixed with MDA-MB-231 and MCF7 positive-mode CSV analysis.** (**A**) Machine learning model comparison. (**B**) Specific cluster ions box plots within C0, C1 and C2 clusters. (**C**)SHAP beeswarm.


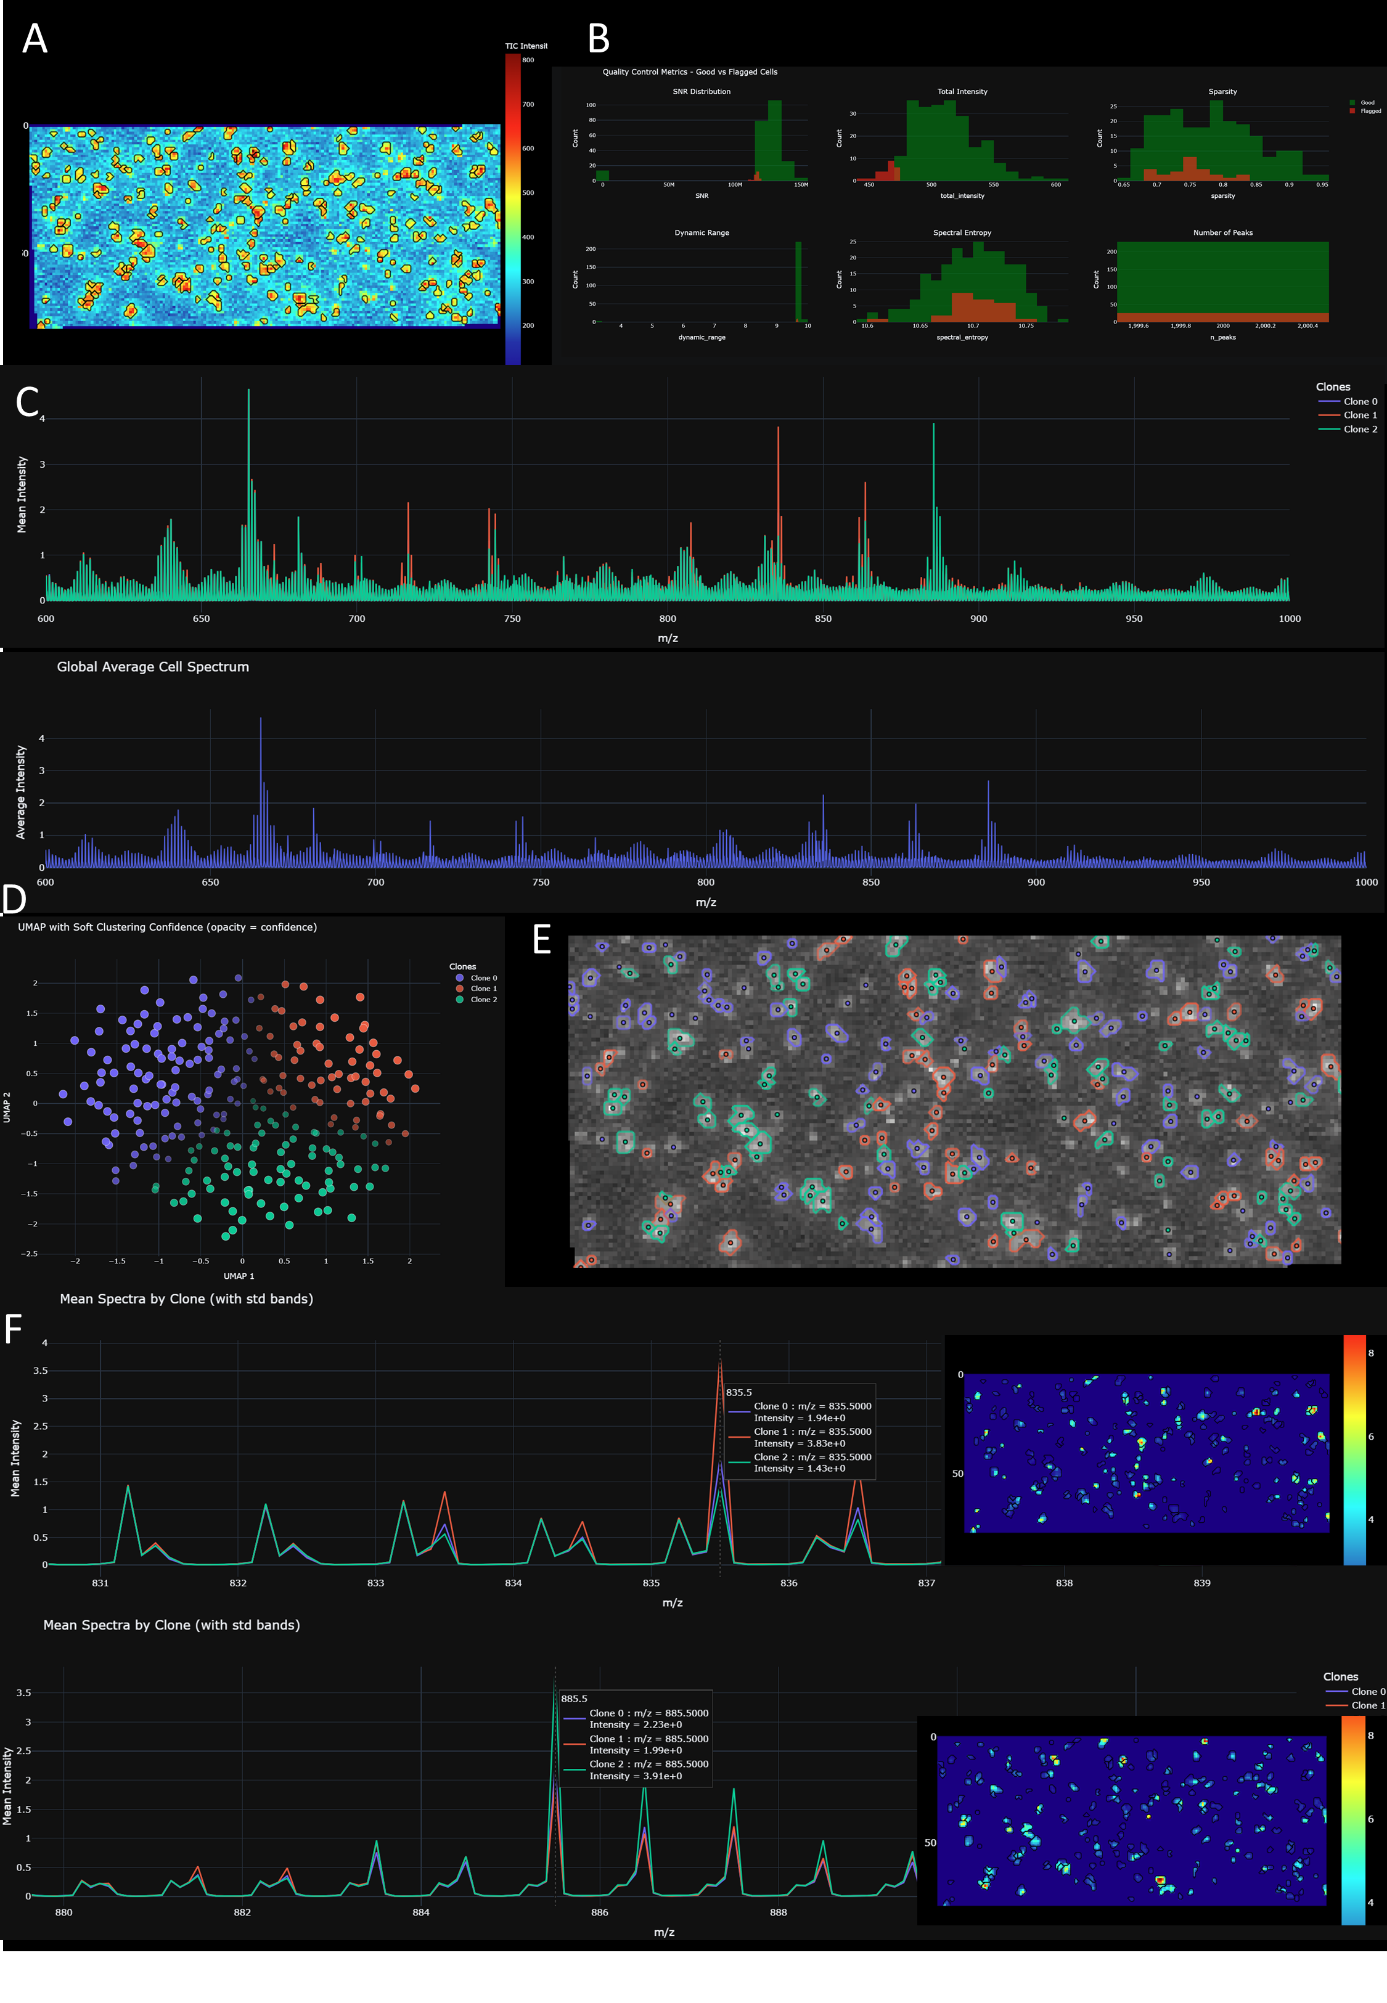


**Figure S21: Spatial and Molecular Characterization of AU565 mixed with MDA-MB-231 and MCF7 negative-mode.** (**A**) TIC map with watershed-based cell contours delineated across the mixed MDA-MB-231/MCF7/AU565 cytospin preparation. (**B**) Histograms of quality-control metrics. (**C**) Global average mass spectrum computed across all retained cells (*m/z* 350–1050). (**D**) UMAP projection with soft clustering confidence revealing three distinct subpopulations: C0 in blue, C1 in red and C2 in green. (**E**) Spatial back-projection of cluster assignments onto the MSI acquisition area, confirming stochastic intermingling of C0, C1 and C2 cells. (**F**) Spatial distribution and abundance of specific lipid ions (*m/z* 835.50 and *m/z* 885.50). The heatmaps (pseudo-colored from blue to red) demonstrate how specific lipid metabolites are differentially expressed across the cell population, corresponding to the clusters identified in the UMAP.


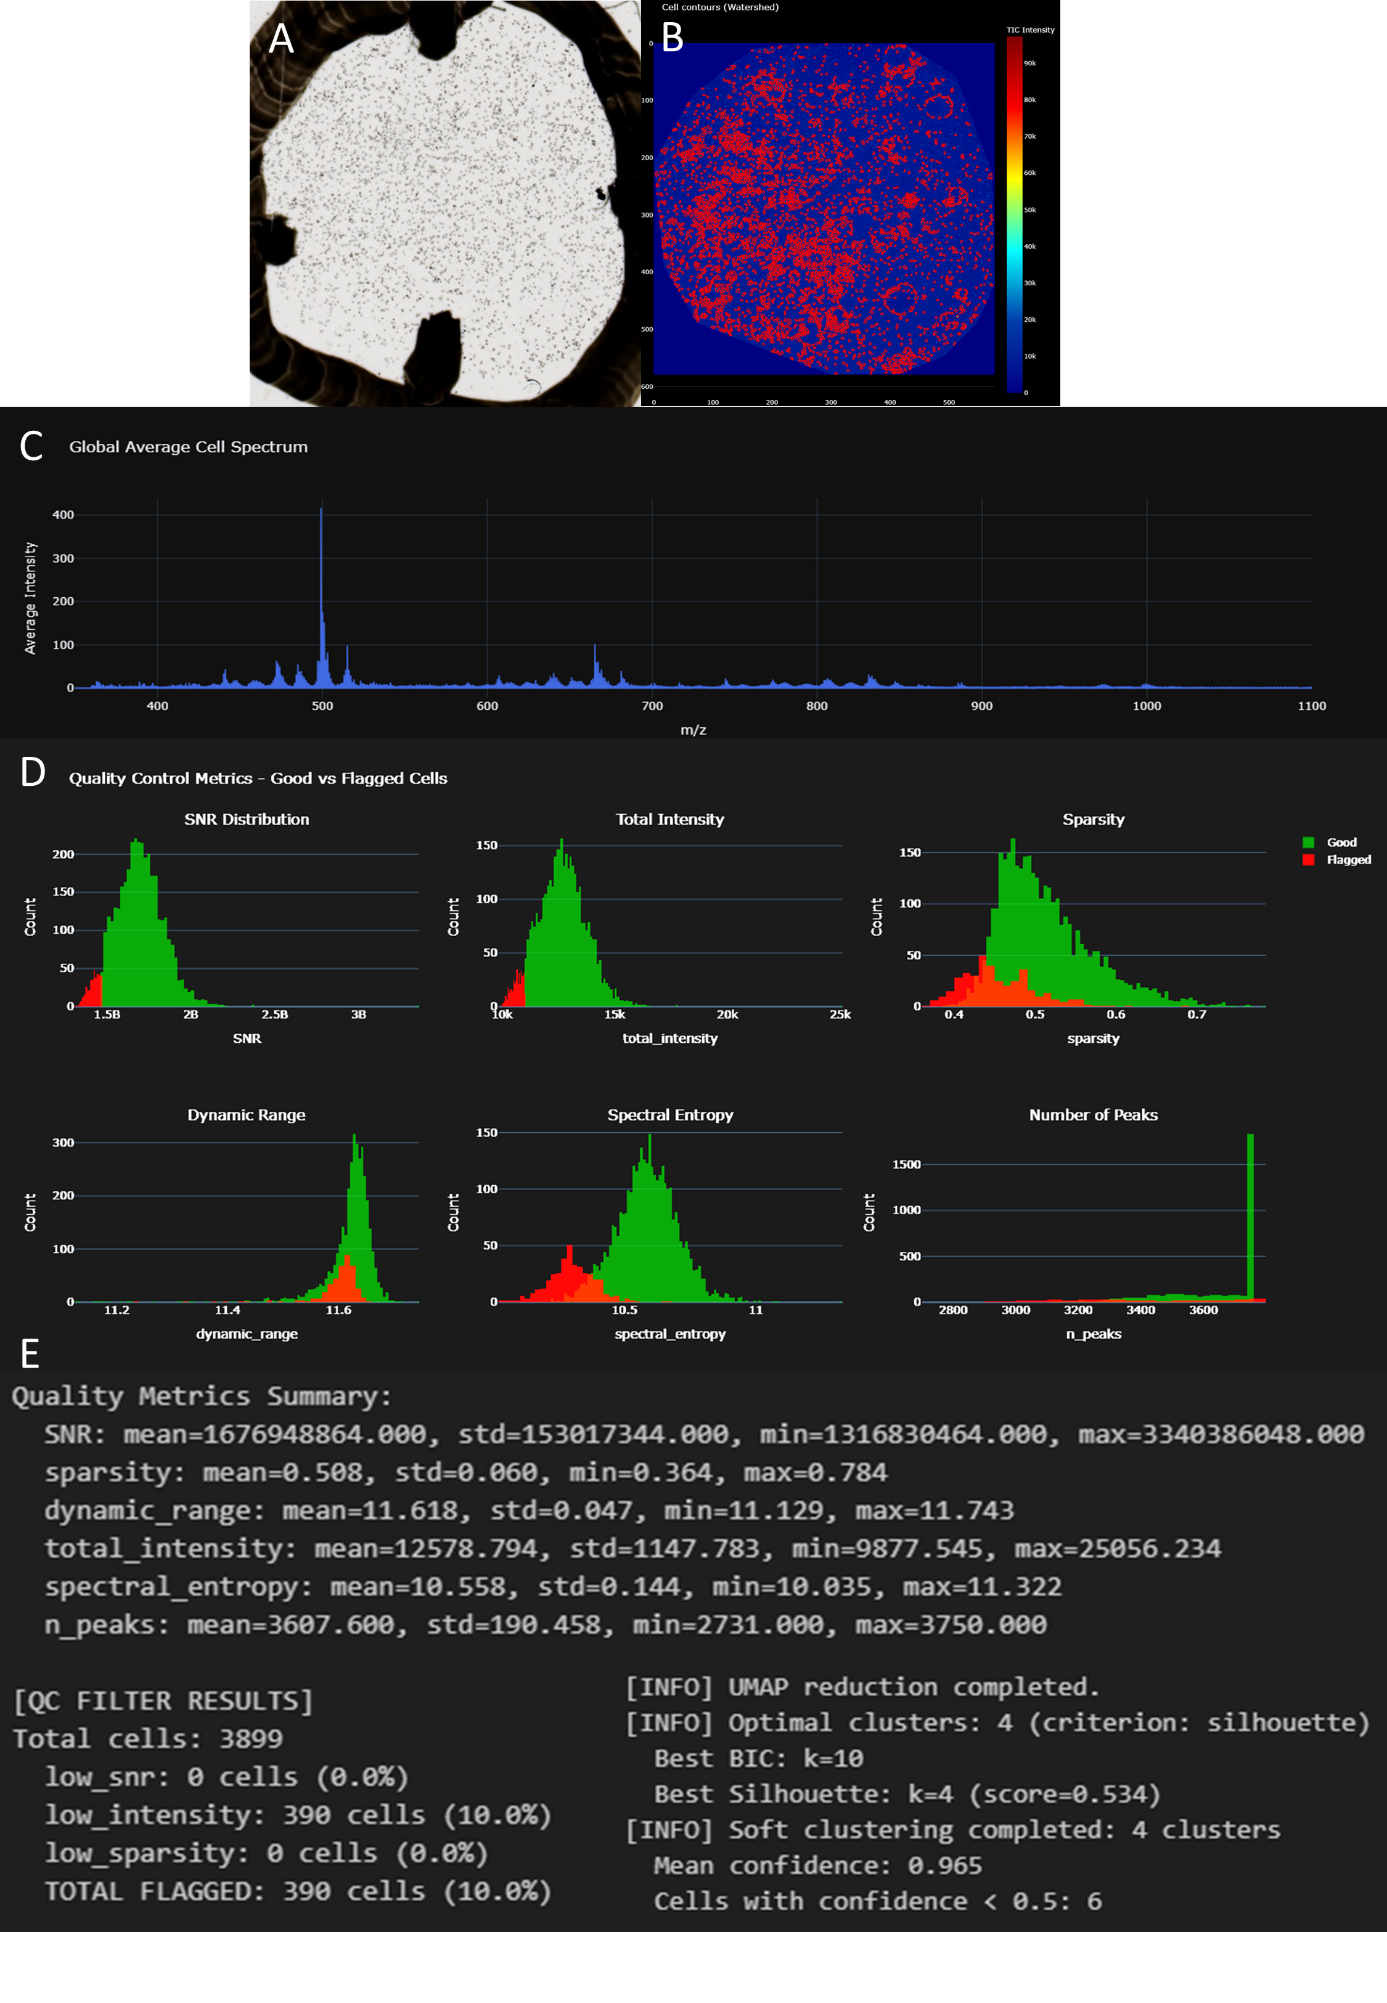


Figure S22: Quality metrics for NCH82 negative-mode analysis. (A) Microscopy. (B) TIC MALDI image. (C) Average spectrum. (D) QC histograms. (E) QC summary with automated first-pass log (k = 4). Figure 6 reports the curated three-MSp biological interpretation.


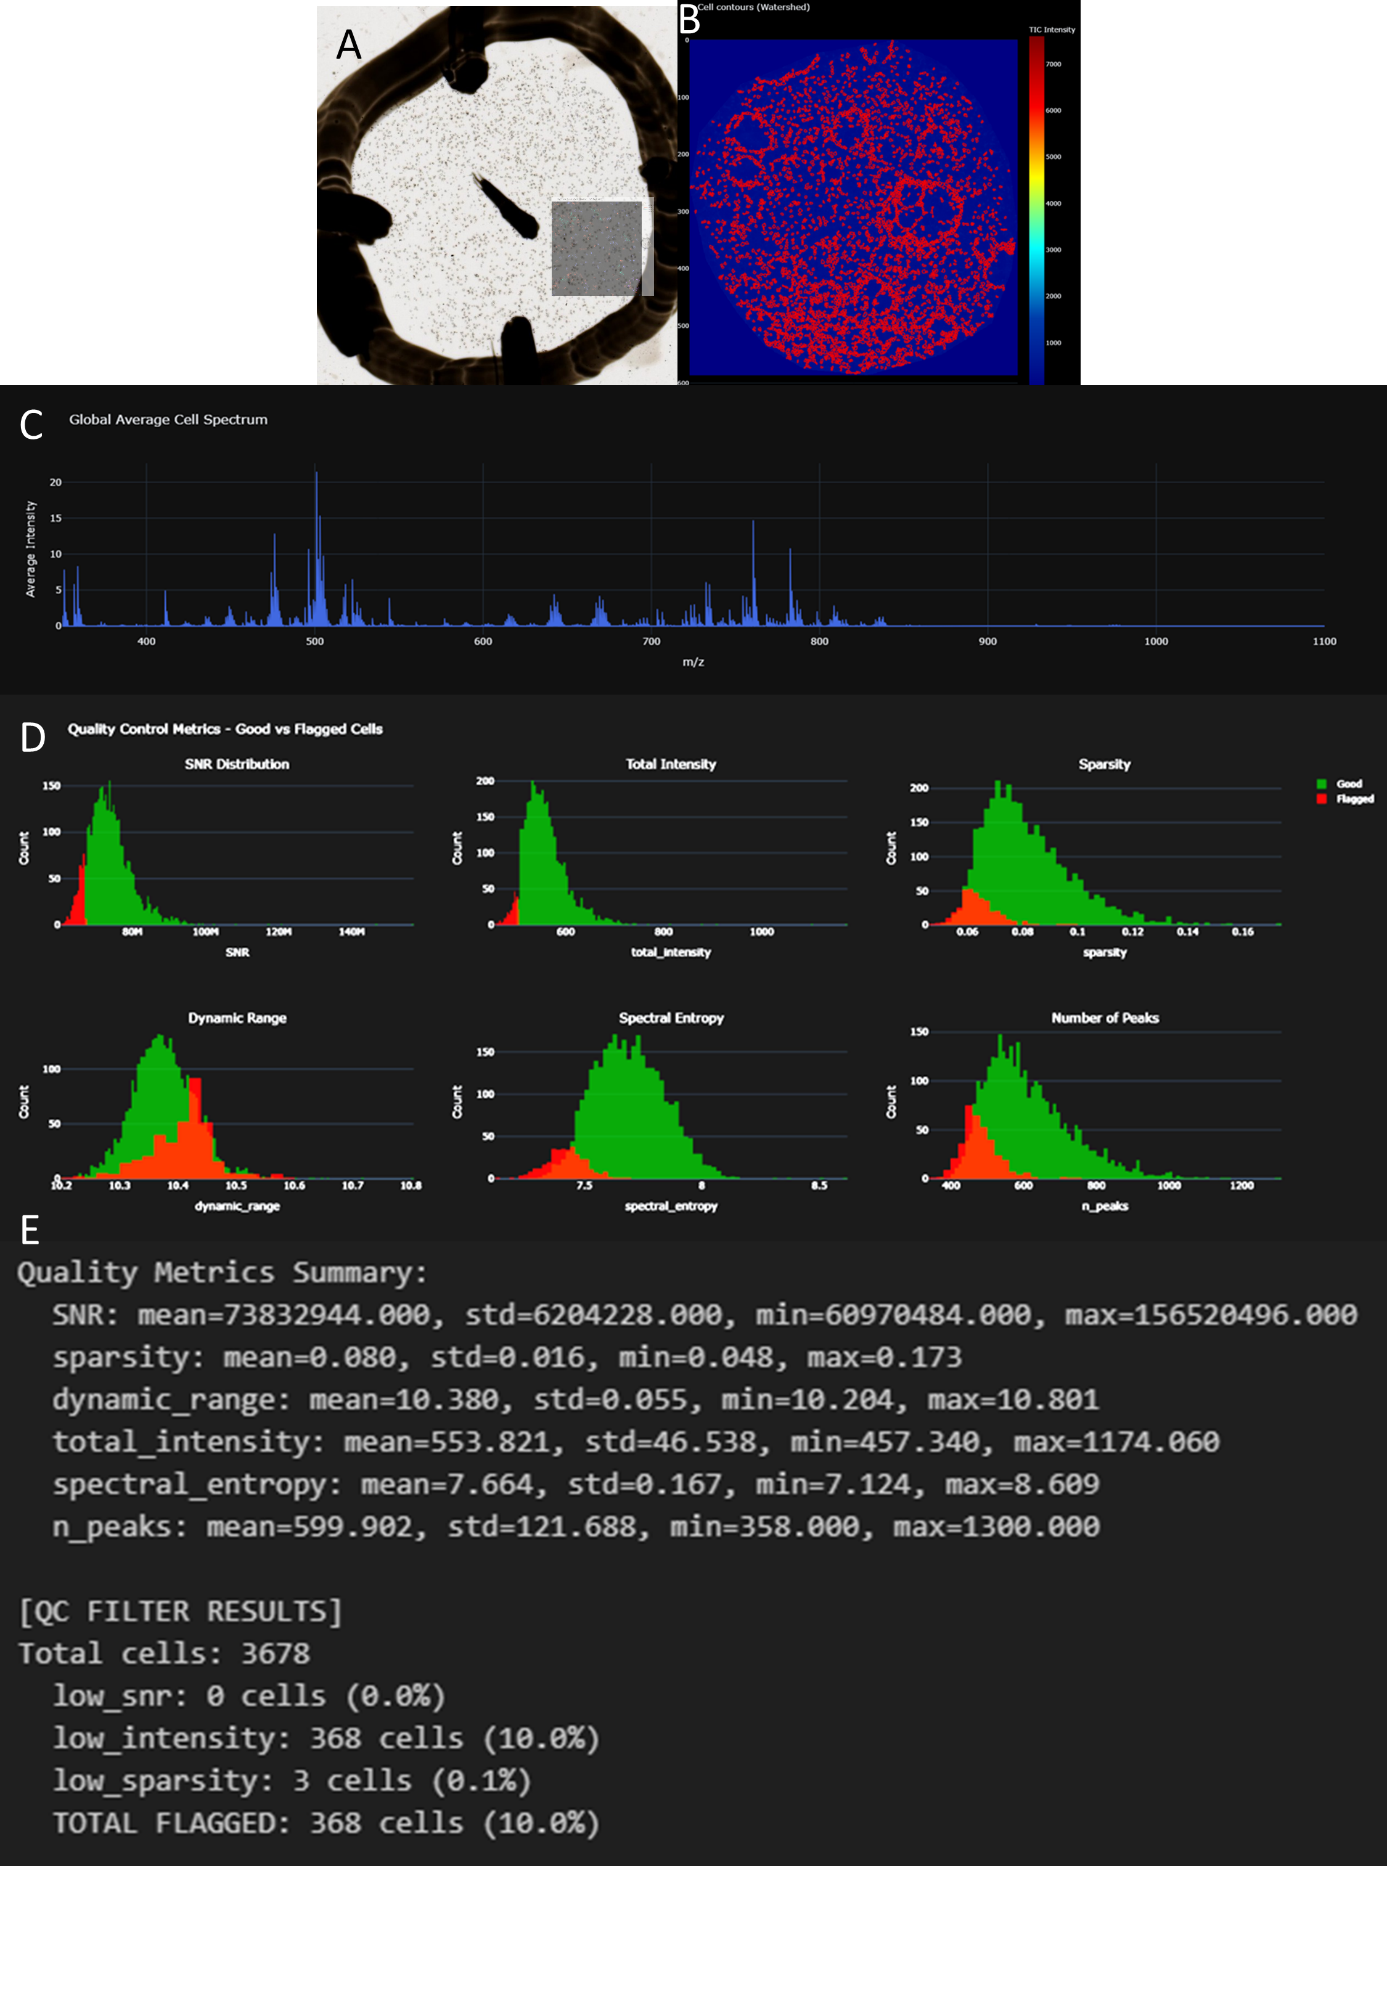


**Figure S23: Quality metrics for NCH82 positive-mode analysis.** (**A**) Microscopy image of the cells. (**B**) Corresponding TIC MALDI image. (**C**) Average mass spectrum. (**D**) Histograms of quality-control metrics. (**E**) Summary of quality-control results.

**
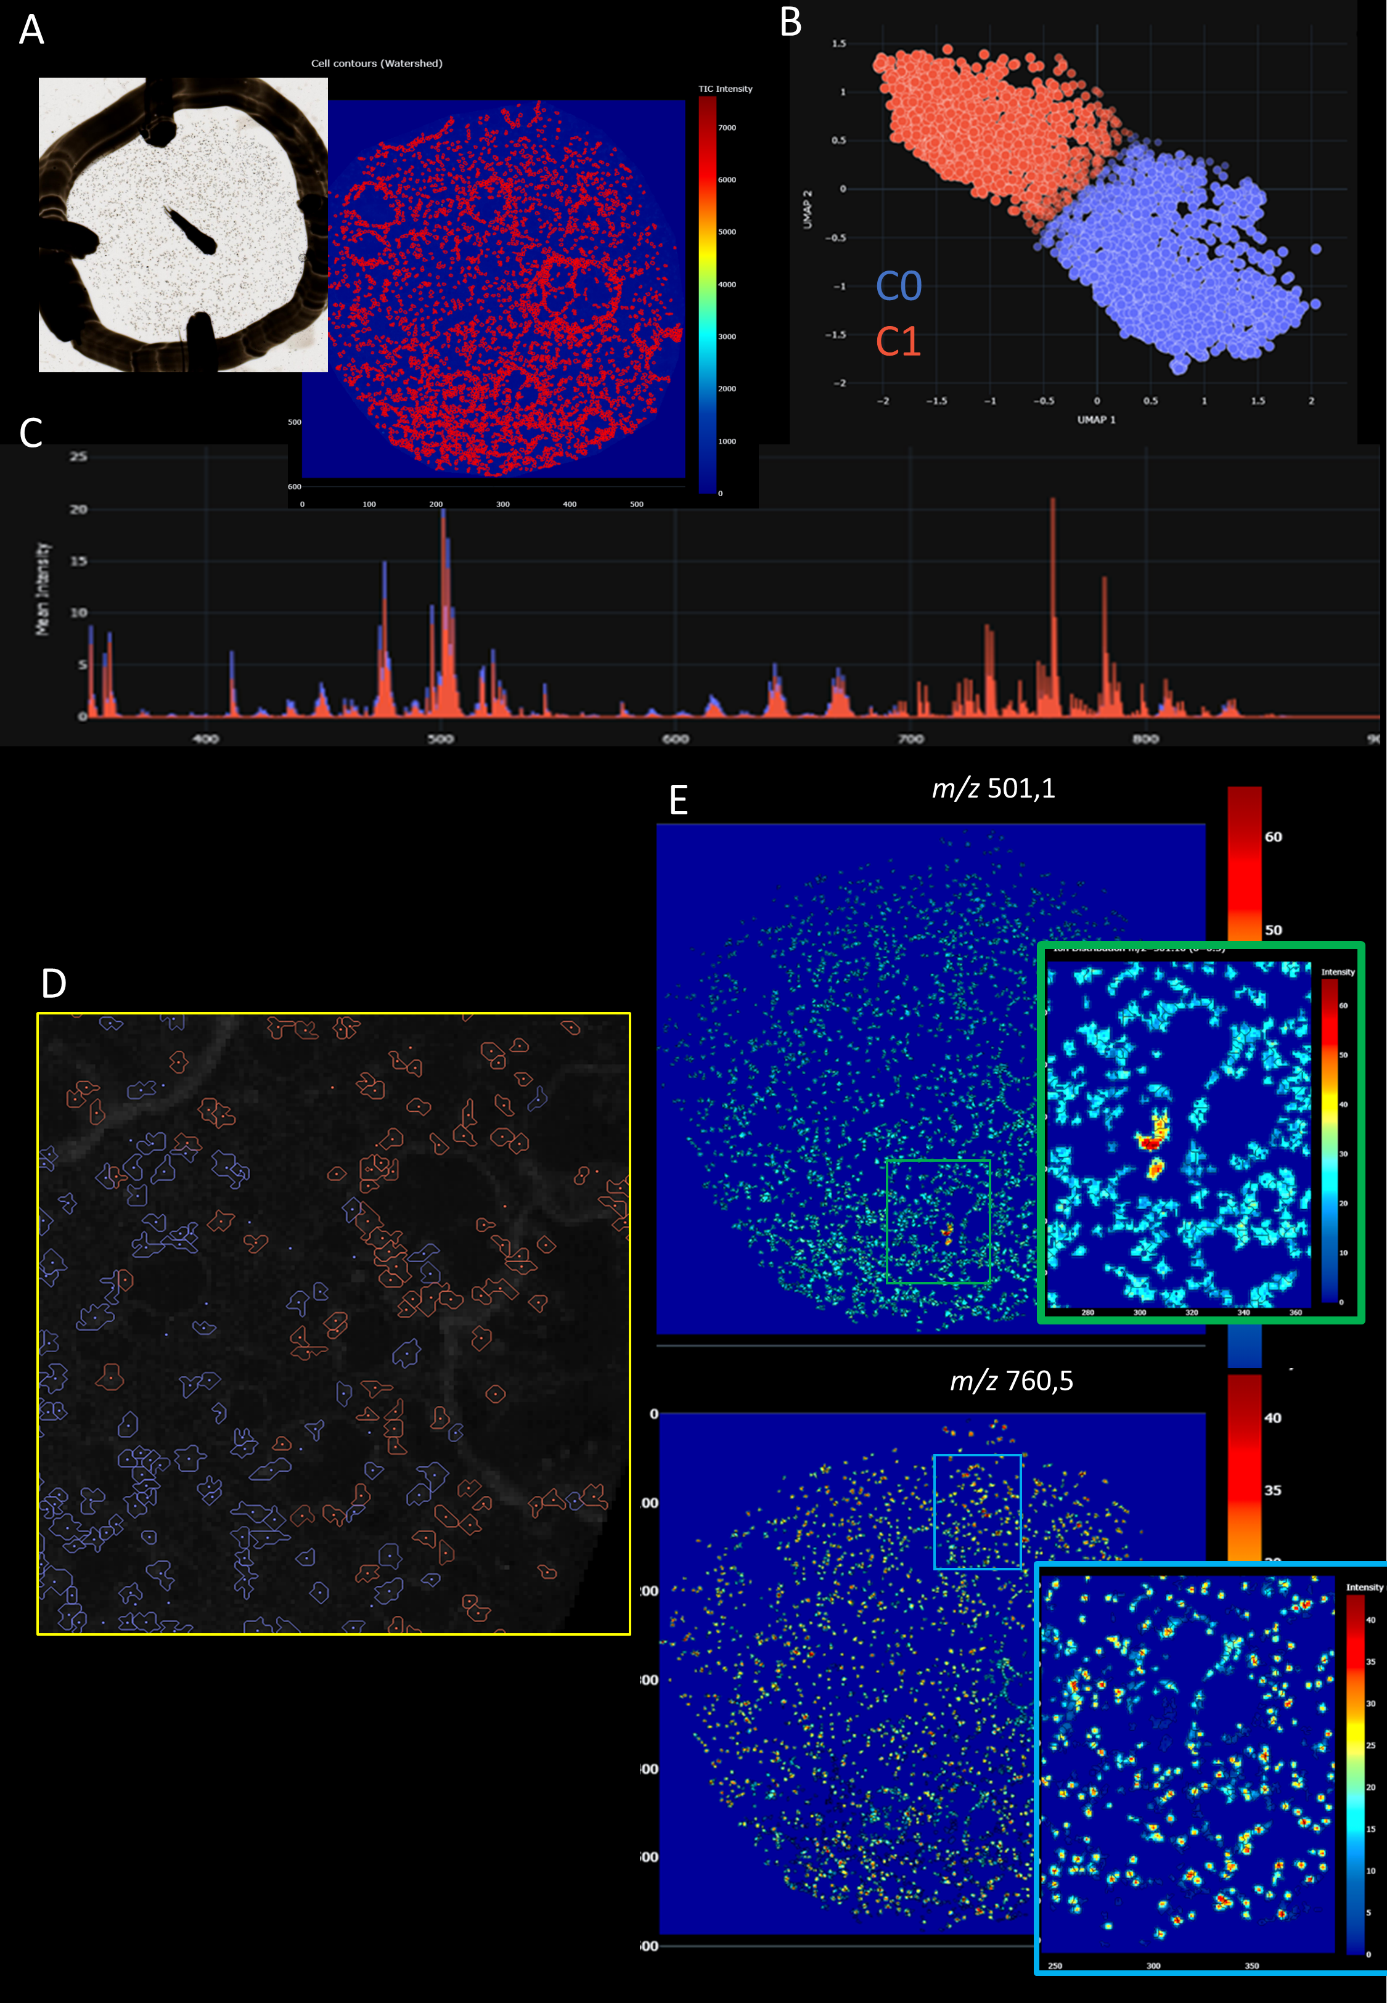
**

Figure S24: Spatial and molecular characterization of NCH82 in positive mode. (A) Optical microscopy and cell segmentation. High-resolution brightfield image of NCH82 cells before MALDI analysis; inset shows the full sample area, and the main view displays individual cell segmentation and MSp assignments. (B) UMAP visualization of lipidomic clusters. The UMAP projection shows two molecular subpopulations (MSp 0 and MSp 1), indicating metabolic heterogeneity within the NCH82 population. (C) Representative positive-mode mass spectrum. Mean intensity spectrum highlighting prominent lipid species identified in positive ion mode; peaks are color-coded by their contribution to the clusters in panel B. (D) Spatial distribution map of MSp assignments in the highlighted region of interest. (E) Ion-specific intensity maps showing spatial abundance of m/z 501.1 and m/z 760.5.


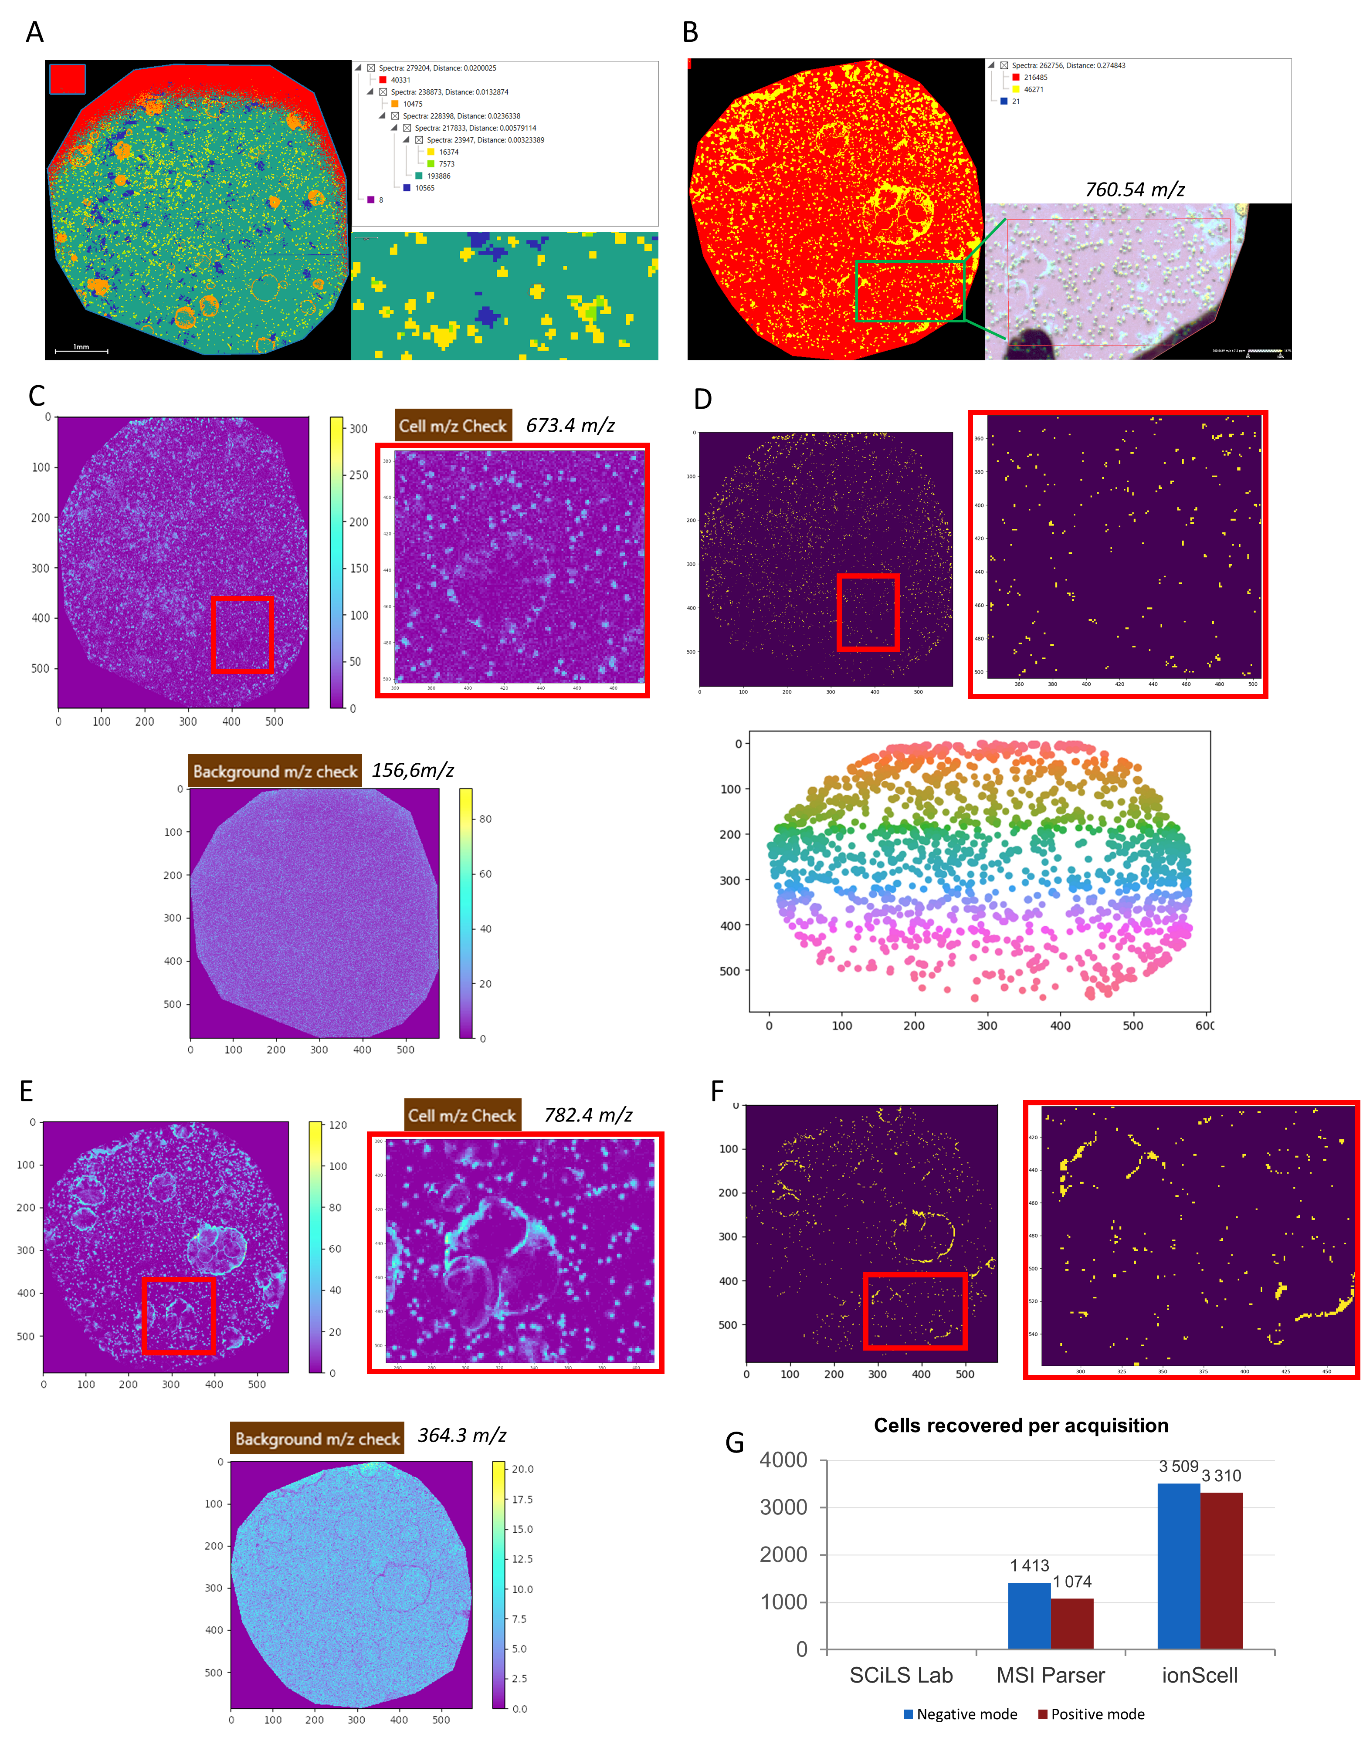


**Figure S25: *Benchmark comparison of ionScell, SCiLS Lab and MSI Parser on the NCH82 glioblastoma cytospin in negative and positive ionization modes.*** **(A) SCiLS Lab negative mode.** Bisecting k-means segmentation (correlation distance) applied to the NCH82 negative-mode cytospin, iterated to 7 clusters. The cell layer (yellow cluster) is distinguished from the matrix background (red cluster, dominant). A red-framed control region devoid of cells is visible in the lower-right quadrant, confirming correct background assignment. Inset shows a zoomed region highlighting the spectral cluster boundaries: cells are detected as a single collective region of interest and cannot be isolated as individual objects. The hierarchical cluster tree (right) shows the bisection structure with spectral distances. No per-cell boundary delineation is possible. **(B) SCiLS Lab positive mode.** Two-cluster bisecting k-means result in positive mode: the dominant red cluster encompasses the full cell layer; a smaller cluster marks background regions. An ion image overlay at *m/z* 760.54 (PC 34:1 [M+H]⁺) is displayed on the optical brightfield image (right). At this zoom level, individual cells are visually distinguishable and the ion signal is clearly cell-restricted; however, SCiLS Lab does not automatically delineate individual cell contours, each cell would require manual ROI annotation to be isolated as a distinct spectral object, which is impractical at the scale of thousands of cells per acquisition. **(C) MSI Parser negative mode, ion maps.** Ion map used as cell m/z seed: *m/z* 673.4 (PI 34:1 [M−H]−; top panel, cell m/z check). Signal is diffuse and heterogeneous across the cell layer with no spatially coherent cell-level resolution. Zoomed inset (red frame) confirms the absence of individual cell-level signal peaks. Ion map used as background seed: *m/z* 156.6 (matrix artefact; bottom panel, background m/z check). The background ion is featureless and homogeneous, confirming absence of cellular specificity and providing a valid non-cellular reference. **(D) MSI Parser negative mode, DFS segmentation result and isolated cell map.** Top: depth-first search (DFS) segmentation seeded on *m/z* 673.4 produces a binary fragmented map of isolated pixel clusters (yellow spots). Zoomed inset shows that detected regions correspond to scattered, non-contiguous pixel groups rather than coherent individual cell contours. Bottom: spatial scatter plot of the 1,413 cell positions extracted by MSI Parser in negative mode. Colour encodes spatial position only (no cluster identity). Only average spectra can be extracted per cell; no ion spatial localisation within cells is available. **(E) MSI Parser — positive mode, ion maps.** Cell m/z seed: *m/z* 782.4 (PC 36:4 [M+H]⁺; top panel). The ion map displays ring-like intensity patterns consistent with the glycerophosphocholine-enriched cell membrane. The zoomed inset (red frame) reveals arc-shaped intensity regions delineating cell peripheries. Background m/z seed: *m/z* 364.3 (bottom panel): homogeneous low-intensity distribution confirming a valid background reference ion for positive-mode DFS. **(F) MSI Parser positive mode, DFS segmentation result.** DFS segmentation seeded on *m/z* 782.4 in positive mode produces elongated, arc-shaped, fragmented regions (yellow) that reflect the ring-like ion distribution around cell membranes but do not form closed, coherent single-cell contours. Zoomed inset confirms that detected regions are non-contiguous arcs rather than individual cell boundaries. A total of 1,074 cell positions were extracted (vs 3,310 by ionScell, 3.1× fewer). As in negative mode, only average spectrum extraction is available; per-cell ion spatial maps are not generated. **(G) Quantitative comparison of cells recovered per acquisition.** Bar chart comparing the number of individually isolated cells yielded by each method on the NCH82 cytospin in negative mode (blue) and positive mode (red). SCiLS Lab: 0 individual cells isolated in both modes (ROI-level segmentation only). MSI Parser: 1,413 cells (negative) and 1,074 cells (positive). ionScell: 3,509 cells and 3,310 segmented cells retained after six-metric spectral QC in negative and positive mode respectively. ionScell recovers 2.3× more cells than MSI Parser in negative mode and 3.1× more in positive mode, while additionally providing individual cell contours, per-cell ion maps and probabilistic subpopulation clustering.


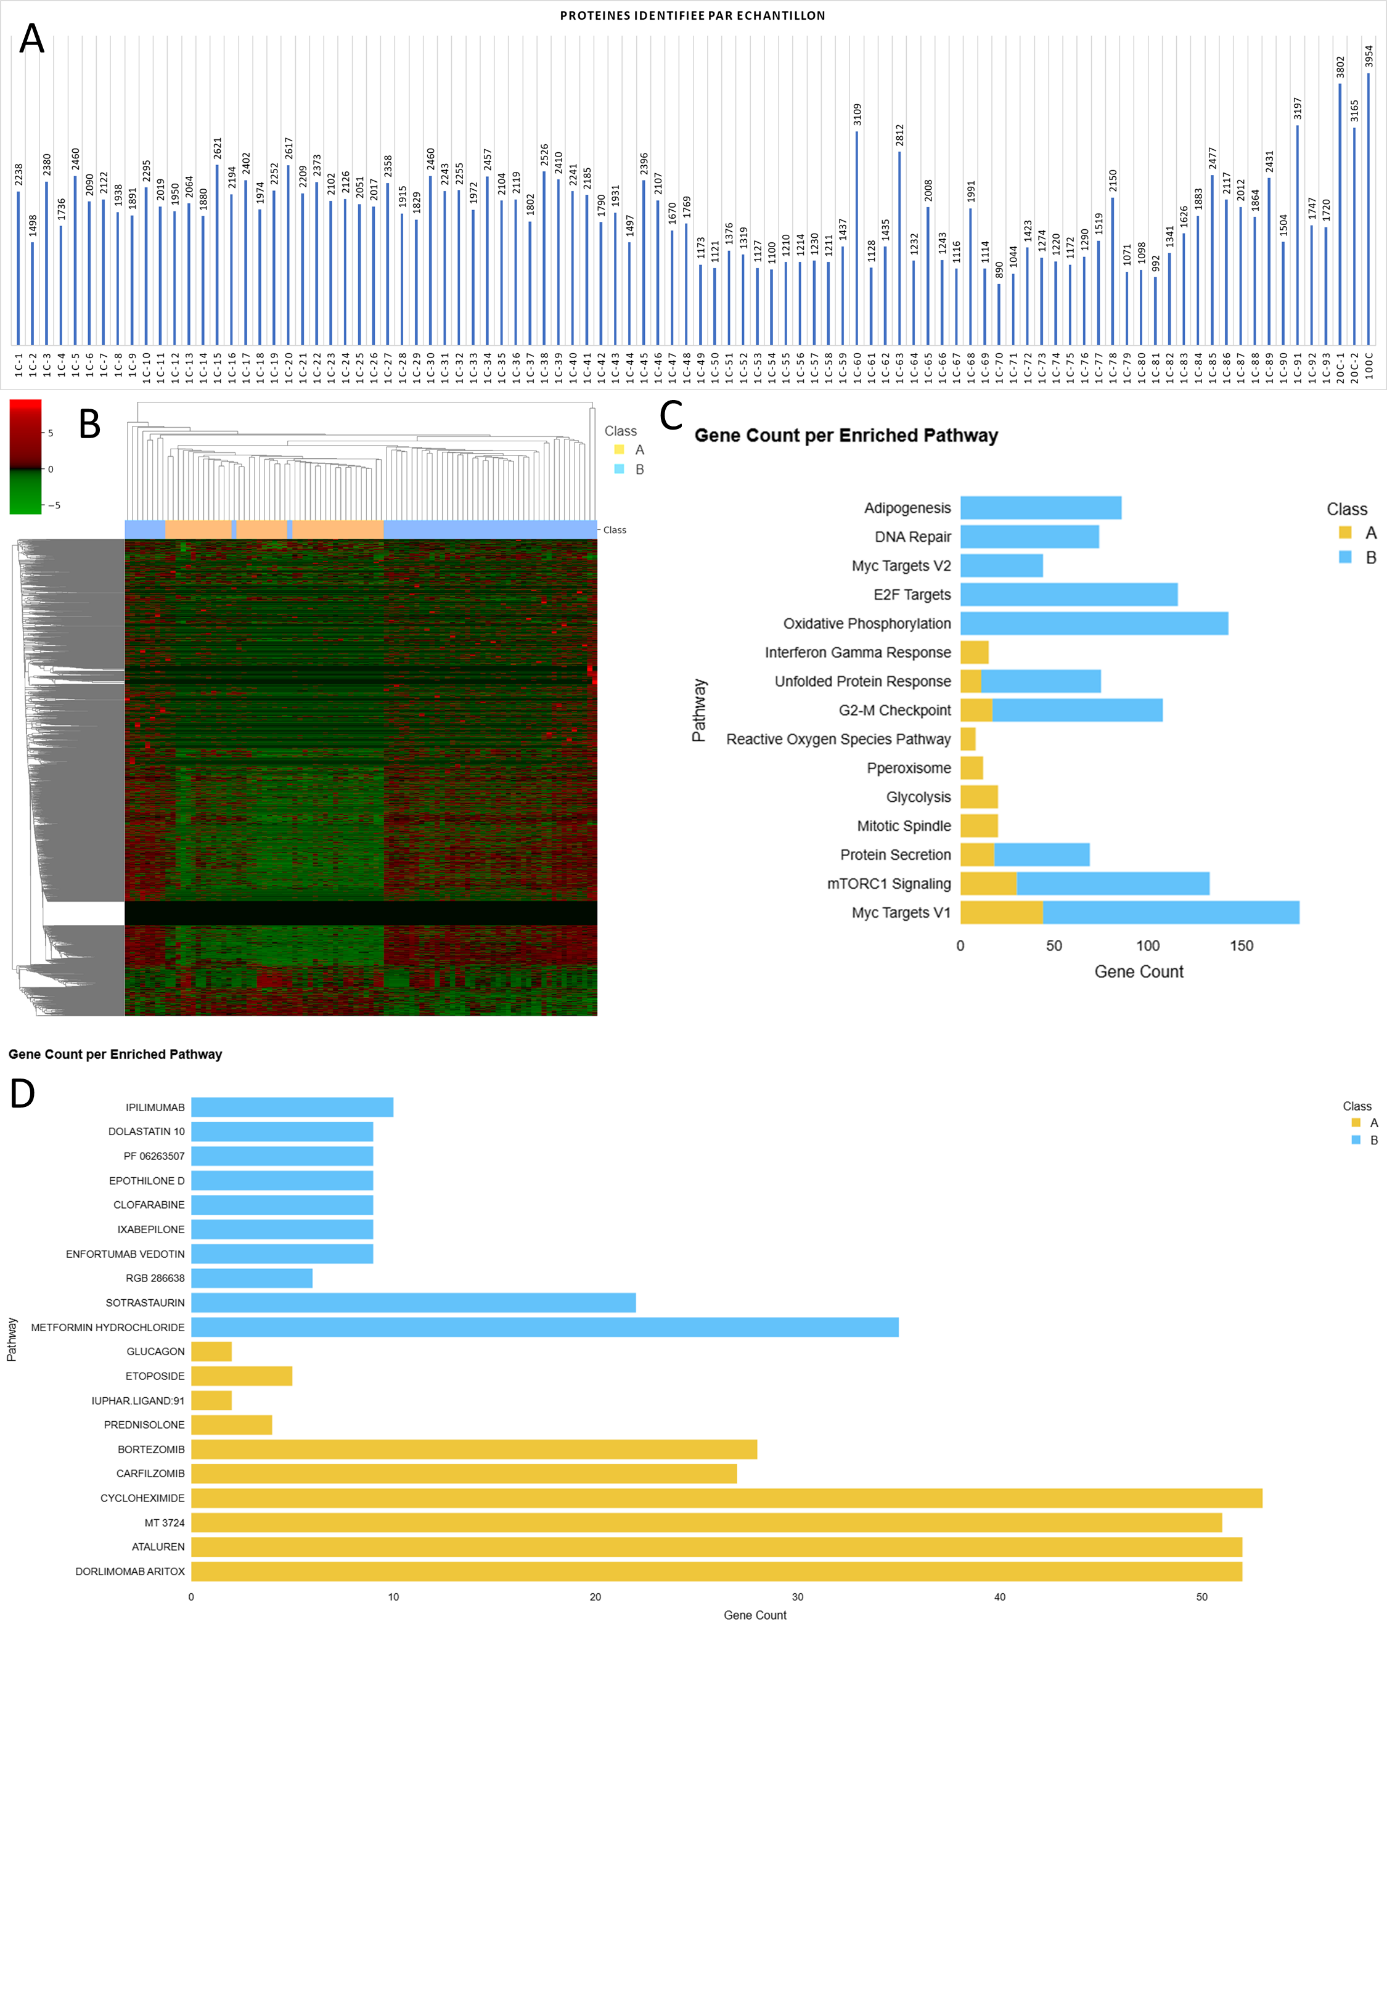
**Figure S26: Global Proteomic Landscape and Differential Pathway Enrichment for NCH82 single cell analysis.** (**A**) Identified Protein Count per cell. (**B**) Hierarchical Clustering and Heatmap. (**C**) Gene Set Enrichment Analysis (GSEA) by Biological Pathway. (**D**) Comparative Drug Connectivity Analysis.


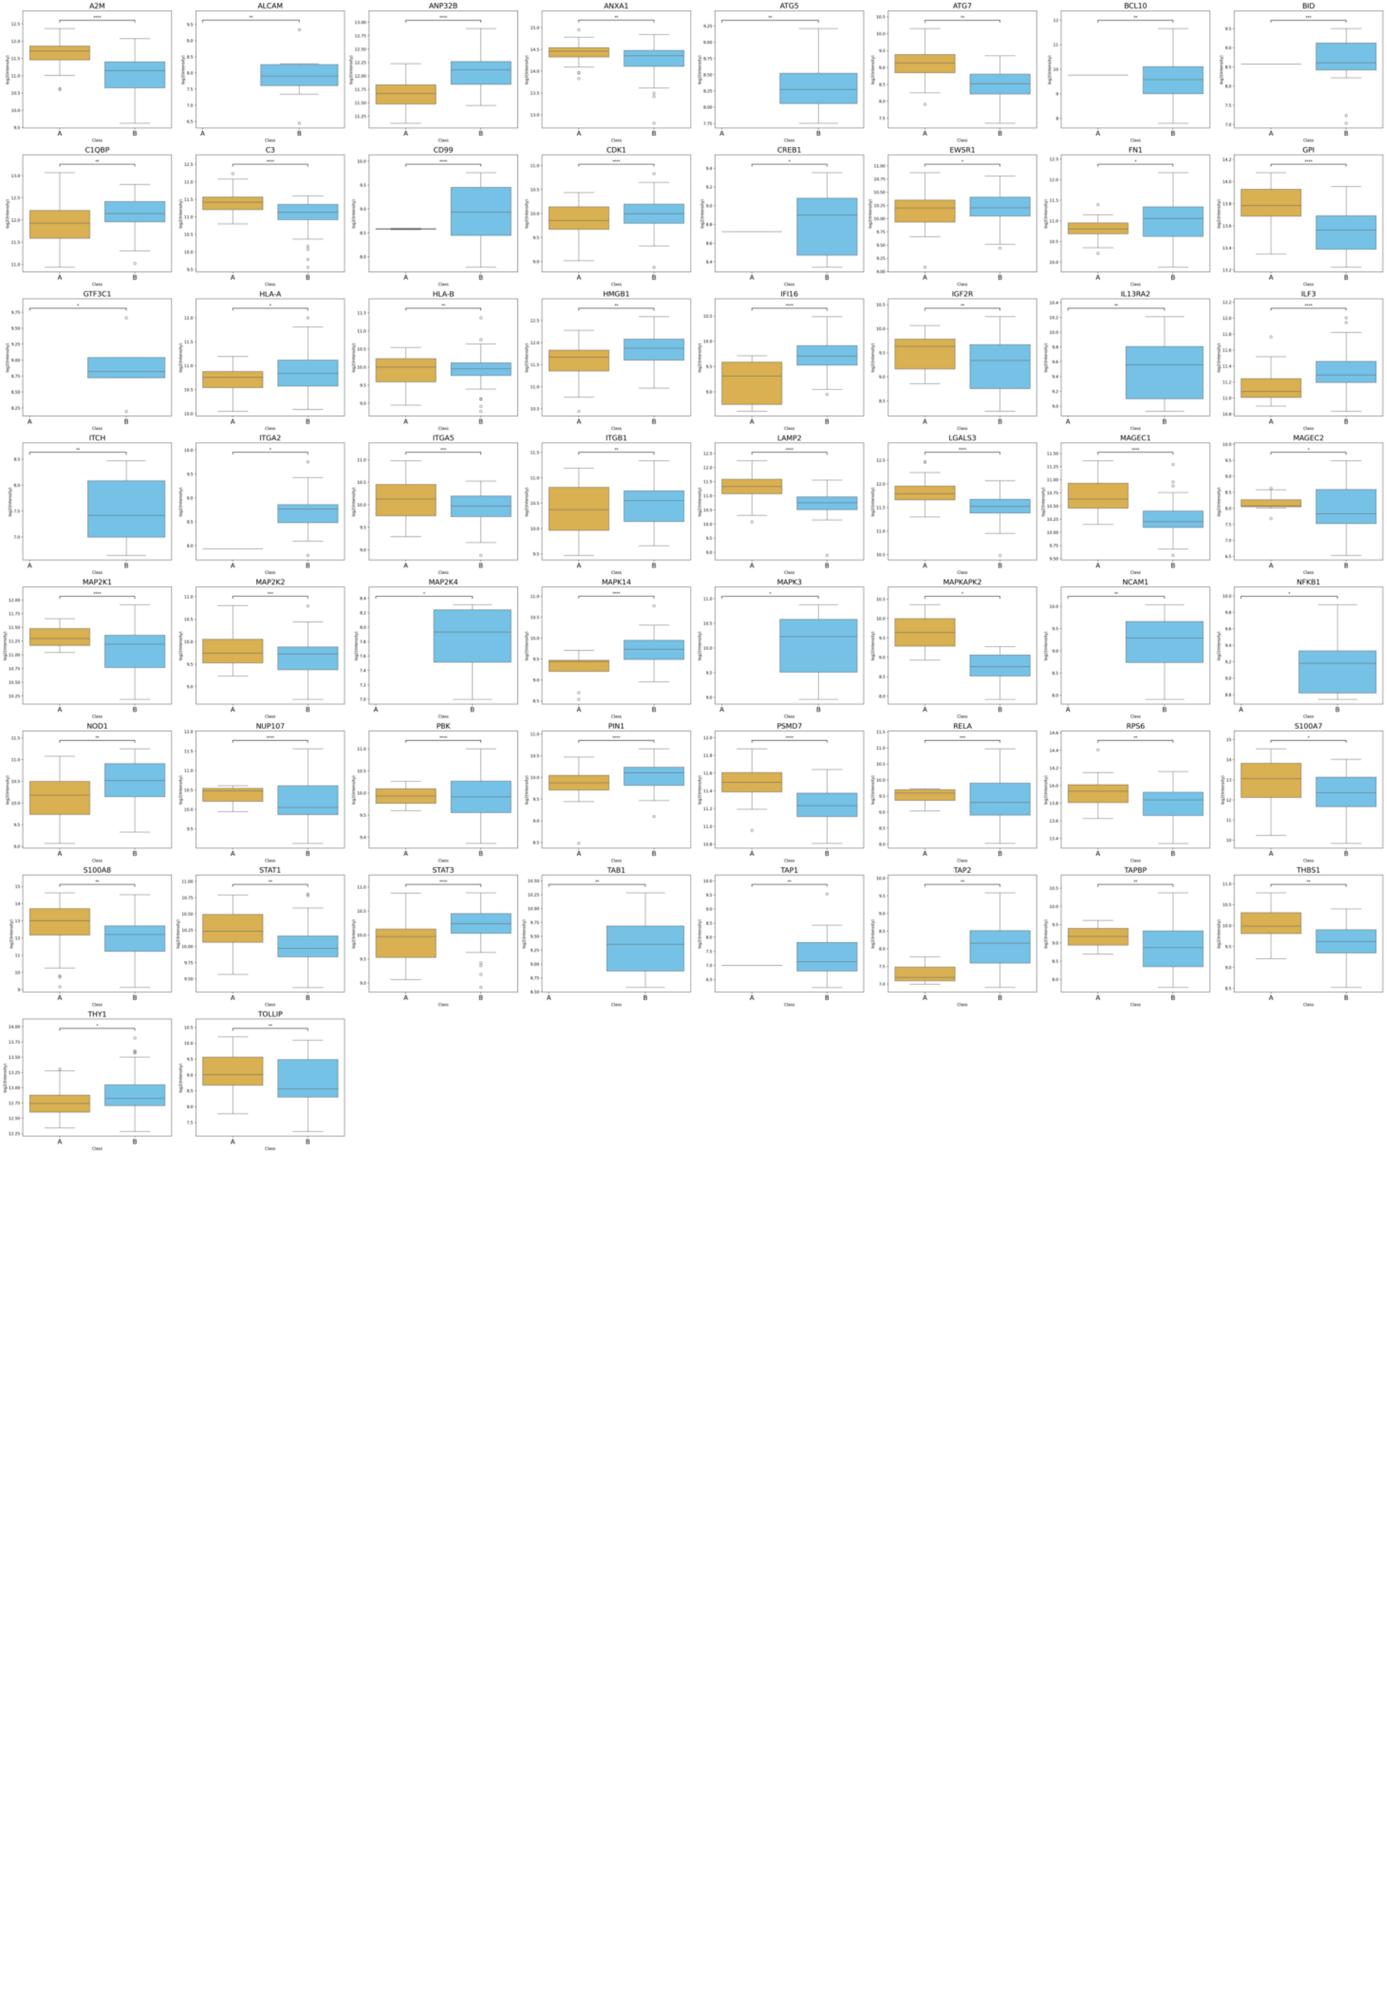


**Figure S27: Differential Expression of Key Immune and Regulatory Markers Across NCH82 Single-Cell Proteomic Clusters.** This figure presents a panel of boxplots comparing the protein expression levels (log intensity) of various immune checkpoints, signaling mediators, and regulatory markers between the two identified groups (**Class A** and **Class B**) in NCH82 single-cell proteomic data. The markers displayed represent several functional categories, including: **Immune Recognition and MHC-I Processing:** HLA-A, HLA-B, TAP1, TAP2, and TAPBP. **Signaling Cascades:** MAPK series (MAP2K1, MAPK14, MAPK3), STAT1, and STAT3. **Cell Adhesion and Surface Markers:** CD99, ITGA2, and NCAM1. A**utophagy and Survival:** ATG5, ATG7, and BCL10.


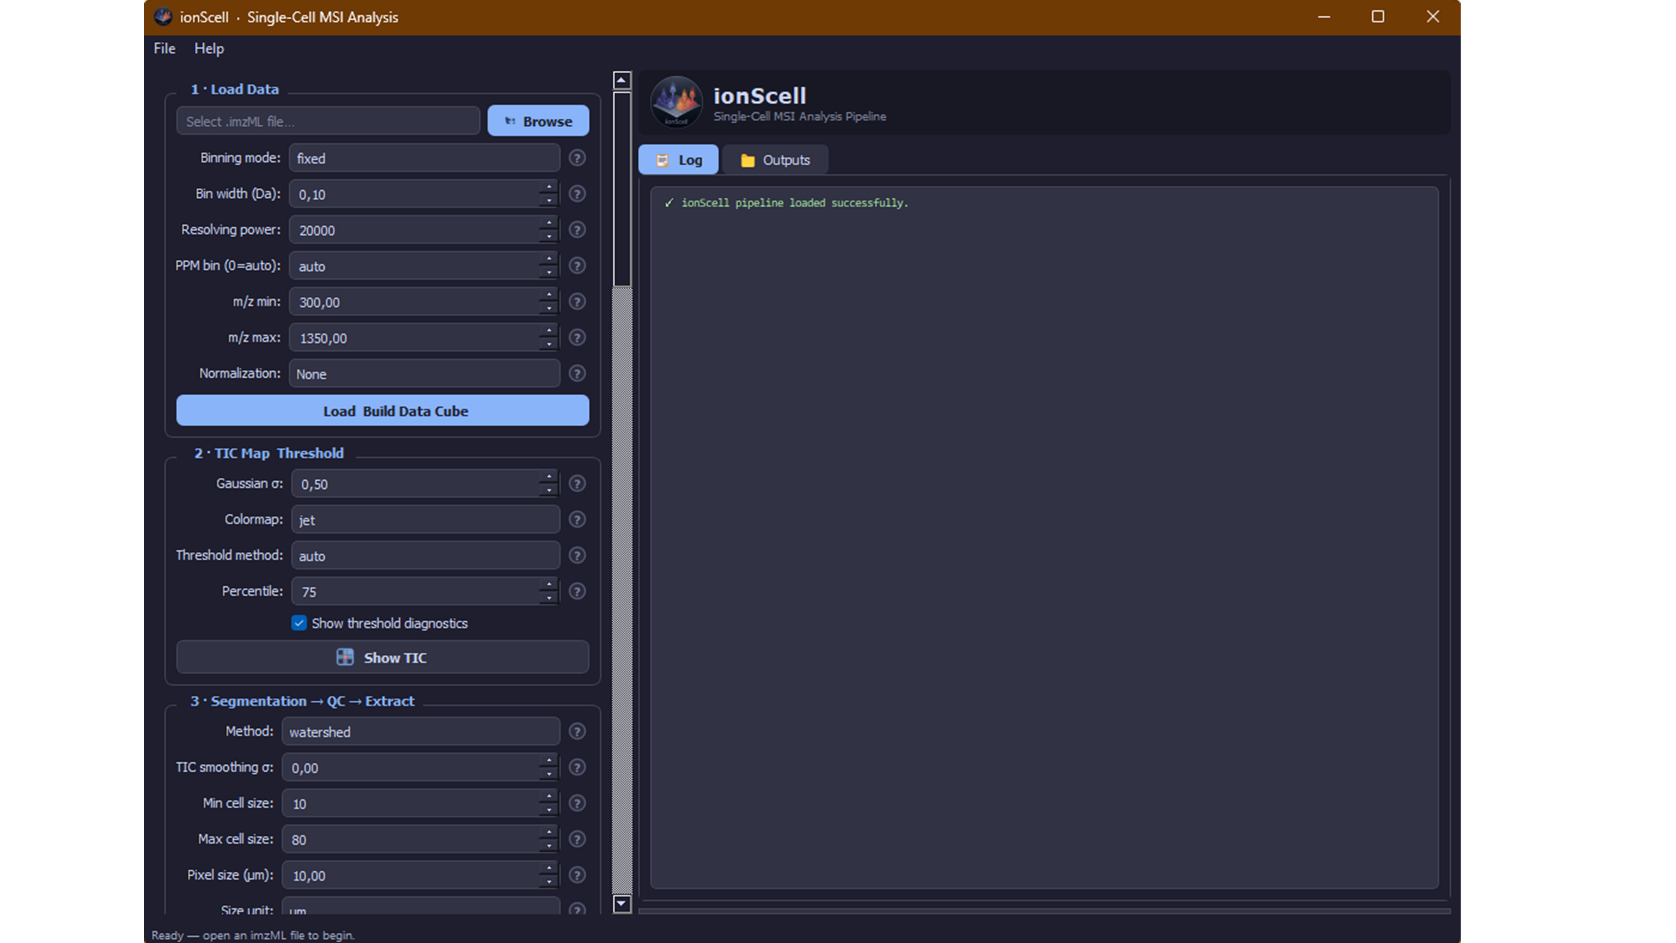


**Figure S28: Screenshot of ionScell GUI.**


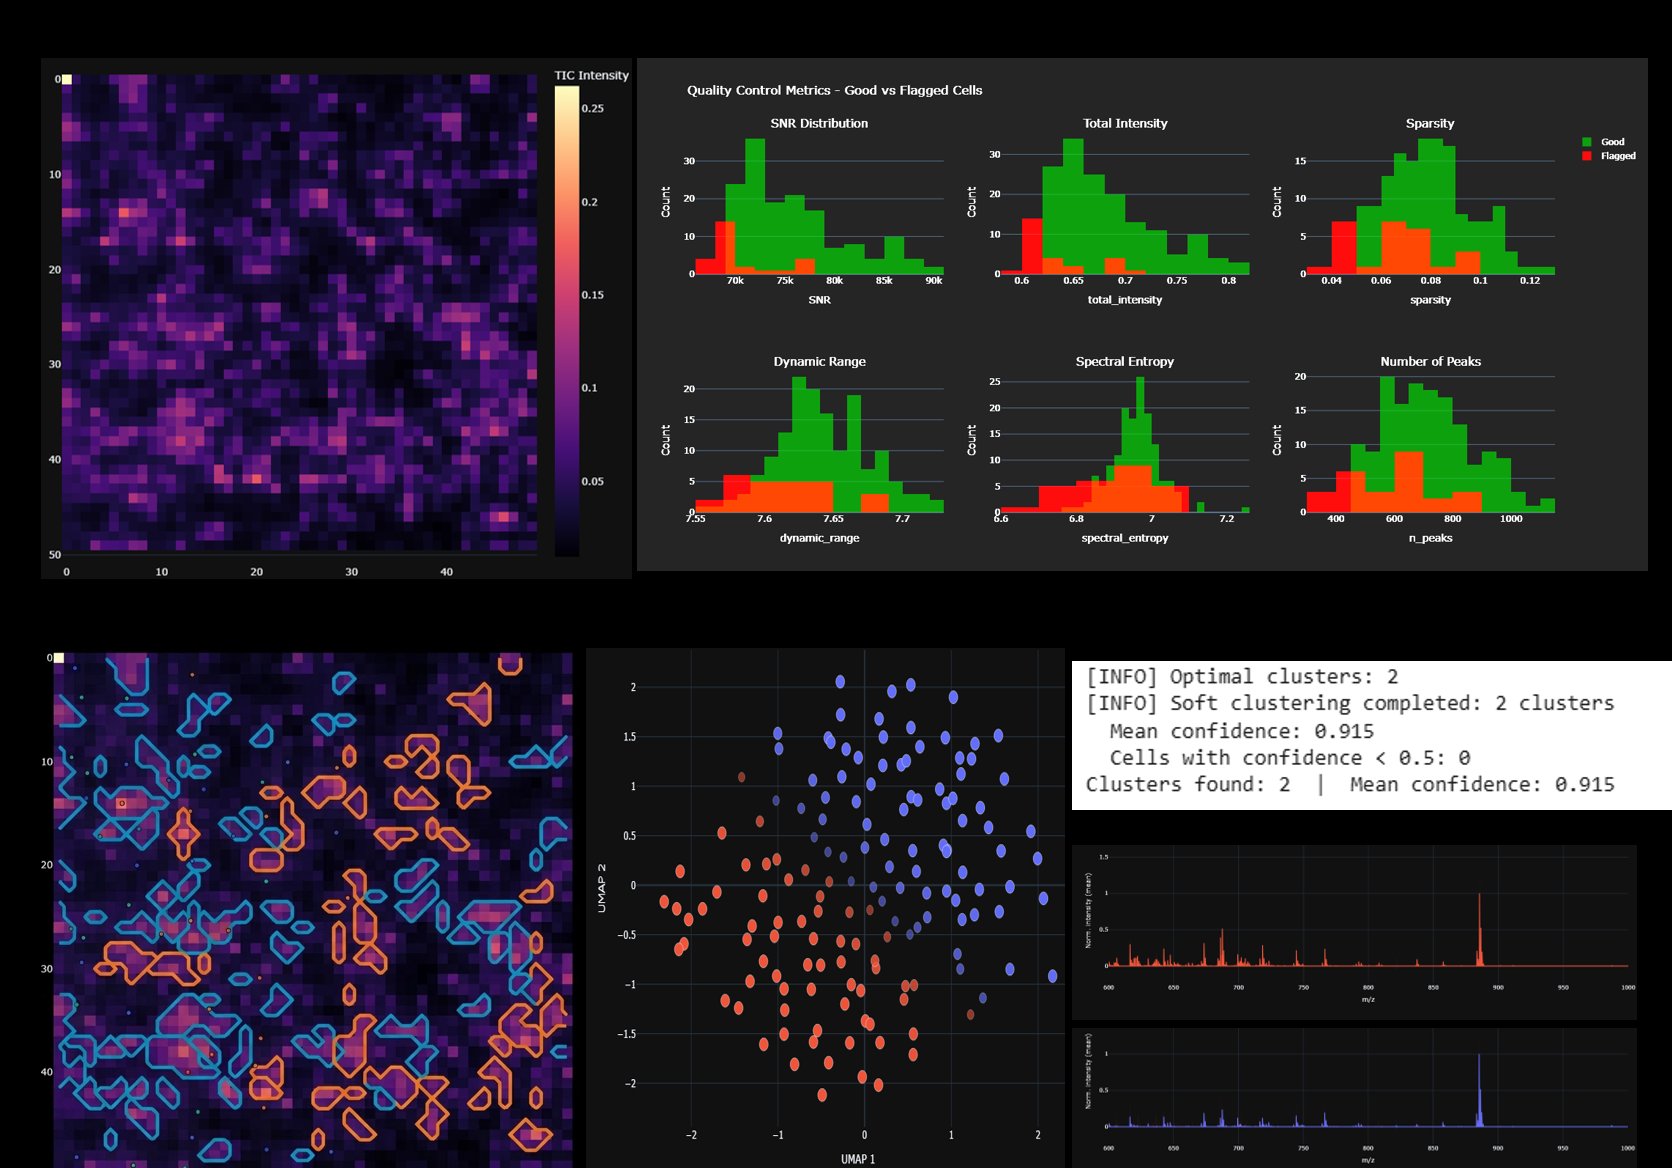


Figure S29: Cross-platform validation of ionScell on the public SpaceM HeLa/NIH3T3 co-culture dataset. Dataset: 14052018_coculture_HeLa_NIH3T3_N1_Neg; MALDI-Orbitrap, negative mode, 50 µm spatial resolution; 52 lipid annotations at FDR 10% (LipidMaps 2017); METASPACE project Rappez_2021_SpaceM [13]. The morphological filter was adapted to the 50 µm pixel size (min_cell_size = 50 µm, max_cell_size = 150 µm), and TIC normalization was applied. (A) TIC map after normalization showing the full acquisition field with pixel intensity encoded in a violet-to-yellow pseudocolor scale. (B) Six-metric QC histograms (SNR, total intensity, sparsity, dynamic range, spectral entropy and number of peaks): 177 cells segmented; 31 flagged (red); 146 retained (green; 82.5% retention), consistent with retention rates on our own acquisitions (Supplementary Table S2). (C) Spatial map of segmented cell contours color-coded by MSp assignment (C0: orange; C1: cyan), overlaid on the TIC image. (D) UMAP projection with soft GMM clustering: two high-confidence molecular subpopulations (mean confidence = 0.915; 0 cells below the 0.5 ambiguity threshold). Terminal log confirms optimal clusters = 2 and mean confidence = 0.915. (E,F) Mean spectra for C0 (orange) and C1 (blue), illustrating the spectral basis of subpopulation separation; the two profiles are consistent with the distinct lipid compositions of HeLa and NIH3T3 cells. The successful identification of two subpopulations concordant with the known co-culture composition demonstrates cross-instrument and cross-protocol applicability of ionScell without parameter re-optimization beyond cell-size adaptation. For context, SpaceM reported 91.3% cell-type classification accuracy on 846 HeLa/NIH3T3 cells pooled across six acquisitions (two co-culture replicates, two HeLa mono-cultures and two NIH3T3 mono-cultures) using fluorescence reporters (mCherry/GFP) as ground truth. The present ionScell validation used a single ROI from one negative-mode acquisition (dataset: 14052018_coculture_HeLa_NIH3T3_N1_Neg; 50 µm pixel size; 50×50-pixel field; 177 cells segmented, 146 retained after QC), without fluorescence input or microscopy co-registration. These two analyses are not quantitatively comparable (asymmetric scale: six acquisitions versus one ROI; fluorescence ground truth versus unsupervised TIC-only clustering). The ionScell result demonstrates cross-instrument transferability and biological coherence of the two-population partition (C0/C1 consistent with HeLa/NIH3T3 lipid compositions; mean confidence = 0.915; 0 cells below the 0.5 threshold), not head-to-head performance equivalence.
